# Supplementary material
Source: publisher figshare collection journal article supplement (https://tandf.figshare.com/ndownloader/files/35118454)
Supplement: Supplementary file 1 [file 35118454]

## Sheet: Table S1 Sediment Geochemistry
Sample	Depth [cm bsf]	Ctot [weight%]	Corg [weight%]	Ccarb [weight%]	CaCO3 [weight%]	Ntot [weight%]	Stot[weight%]	Corg/Ntot	Corg/Stot	δ13Ccarb [VPDB‰]	δ18Ocarb [VPDB‰]	δ13Corg [VPDB‰]	δ15Ntot [ATM‰]
CC-K04-0-3	3	15.93	8.97	6.96	57.99	1.02	1	8.77	8.97	-4.51	-1.77	-18.49	3.97
CC-K04-3-5.5	5.5	15.15	7.48	7.67	63.91	0.85	0.91	8.76	8.21	-4.61	-1.49	-19.09	3.57
CC-K04-5.5-8	8	14.45	6.46	7.99	66.58	0.71	0.81	9.09	7.97	-4.58	-1.53	-19.9	3.52
CC-K04-8-11.5	11.5	13.38	4.9	8.48	70.67	0.47	0.74	10.33	6.62	-4.68	-1.54	-21.56	3.69
CC-K04-11.5-15	15	12.29	3.4	8.89	74.08	0.28	0.62	11.88	5.48	-4.58	-1.47	-22.46	4.24
CC-K04-15-18.5	18.5	11.21	2.31	8.9	74.17	0.18	0.45	12.83	5.13	-2.6	-1.74	-21.21	3.46
CC-K04-18.5-22	22	9.84	4.1	5.74	47.83	0.18	0.52	21.8	7.88	-2.19	-1.92	-26.56	3.93
CC-K04-22-25.5	25.5	10.57	10.57	0	0	0.65	1.09	16.03	9.69			-26.08	4.01
CC-K04-25.5-28.5	28.5	15.4	15.4	0	0	0.92	1.78	16.63	8.65			-23.92	4.27
CC-K04-28.5-32	32	12.22	8.84	3.38	28.16	0.44	1.49	19.95	5.93	-6.19	-3.76	-26.32	5.03
CC-K04-32-35	35	13.89	10.09	3.8	31.67	0.4	2.32	24.97	4.34	-9.58	-3.42	-25.72	5.11

## Sheet: Table S2 Sediment Mineralogy
Sample	Depth [cm bsf]	Aragonite [wt%]	Calcite [wt%]	High-Magnesium-Calcite [wt%]	Other Phases [%]
CC-K04-0-3	3	45.7545	9.022	3.2221	42.0013
CC-K04-3-5.5	5.5	48.2915	10.6525	4.9712	36.0848
CC-K04-5.5-8	8	51.2168	10.2434	5.1217	33.4182
CC-K04-8-11.5	11.5	57.7385	7.7559	5.1706	29.3349
CC-K04-11.5-15	15	59.9709	7.9373	6.1735	25.9183
CC-K04-15-18.5	18.5	54.6967	10.1977	9.2706	25.835
CC-K04-18.5-22	22	27.2644	14.3497	6.2182	52.1677
CC-K04-22-25.5	25.5	0	0	0	100
CC-K04-25.5-28.5	28.5	0	0	0	100
CC-K04-28.5-32	32	7.1364	21.0296	0	71.834
CC-K04-32-35	35	4.906	18.286	8.474	68.3341

## Sheet: Table S3 Pore Water Chemistry
Sample	Depth [cm bsf]	Salinity [g kg-1]	pH	Eh [mV]	TA [mmol kg-1]	Ca2+ [mmol kg-1]	Mg2+ [mmol kg-1]	Na+ [mmol kg-1]	K+ [mmol kg-1]	Cl- [mmol kg-1]	∑H2S [mmol kg-1]	SO42- [mmol kg-1]	Cl-/SO42-	NH4+ [mmol kg-1]	SiO2 [mmol kg-1]	δ13C [VPDB‰]	δ18O [VSMOW‰]
ALD_CC_02	+5.0 (water column)	45.3721	8.53	186.6	3.26399	13.5031	68.2571	604.542	12.9052	704.18	0	36.4152	7.13674	0.024817	0.0132228	-9.3681	2.16743
CC_K04_01	2	56.4656	6.998	-41	12.7164	14.0898	88.8401	748.616	15.8851	869.408	0.248569	43.4329	7.3876	0.429563	0.167221	-5.5358	2.8248
CC_K04_02	4.5	65.4919	6.9	85	8.09876	16.6781	103.42	868.176	18.0059	1010.62	0.00632	53.7066	6.94477	0.39369	0.115779
CC_K04_03	7	73.6542	6.863	126	6.74593	19.0181	115.78	978.505	20.0897	1139.16	0.000371312	60.5801	6.93989	0.347693	0.0843219	-7.18703	2.99347
CC_K04_04	10	80.198	6.909	132	5.68691	21.1	125.401	1067.08	21.6334	1242.87	0	65.8623	6.96448	0.177924	0.0627319		3.0623
CC_K04_05	13	82.4315	6.959	148	4.90815	21.8085	127.798	1099.27	22.3338	1280.68	0	66.7415	7.0818	0.0677148	0.0542984	-7.46203	3.03668
CC_K04_06	16.5	82.5284	6.95	147	4.64093	22.1604	126.876	1101.53	22.4846	1282.74	0	66.6552	7.10234	0.0562388	0.0521745	-8.52914	3.03655
CC_K04_07	20	82.365	6.867	151	4.6336	22.4454	126.649	1098.66	22.5225	1280.46	0	66.4133	7.11558	0.0296403	0.0529945	-7.63984	3.05145
CC_K04_08	23.5	81.978	6.881	---	4.53663	22.3004	127.241	1091.6	22.2788	1274.19	0	66.4777	7.07385	0.0240338	0.0510348
CC_K04_09	27	82.005	6.85	---	4.68972	22.2884	127.273	1092.58	22.147	1274.41	0	66.3911	7.08429	0.0511314	0.0492557
CC_K04_10	30.5	80.3753	6.833	146	4.93139	21.9997	124.485	1070.91	21.8382	1249.55	0.000744913	64.6147	7.13711	0.0783325	0.0481869

## Sheet: Table S4 Saturation Indices
Sample	Depth [cm bsf]	Aragonite [SI]	Calcite [SI]	Dolomite (d) [SI]	Dolomite [SI]
ALD_CC_02	+5.0 (water column)	1.11	1.25	2.95	3.46
CC_K04_01	2	0.32	0.46	1.42	1.96
CC_K04_02	4.5	0.09	0.23	0.97	1.5
CC_K04_03	7	0.03	0.17	0.84	1.37
CC_K04_04	10	0.04	0.18	0.86	1.39
CC_K04_05	13	0.04	0.19	0.86	1.39
CC_K04_06	16.5	0.02	0.16	0.8	1.33
CC_K04_07	20	-0.06	0.09	0.64	1.17
CC_K04_08	23.5	-0.05	0.09	0.65	1.18
CC_K04_09	27	-0.07	0.07	0.62	1.15
CC_K04_10	30.5	-0.07	0.07	0.61	1.14		SI = log(IAP/Ksp)

## Sheet: Table S5 Total community (DNA)
Depth [cm bsf]	Acidobacteriota [%]	Actinobacteriota [%]	Bacteroidota [%]	Campilobacterota [%]	Chloroflexi [%]	Cyanobacteria [%]	Dependentiae [%]	Desulfobacterota [%]	DTB120 [%]	Entotheonellaeota [%]	Firmicutes [%]	Gemmatimonadota [%]	Halanaerobiaeota [%]	Myxococcota [%]	NB1.j [%]	Nitrospirota [%]	Alphaproteobacteria [%]	Gammaprotebacteria-Halomonas [%]	Gammaproteobacteria [%]	Patescibacteria [%]	Planctomycetota [%]	SAR324 clade Marine group B [%]	Spirochaetota [%]	Synergistota [%]	unclassified taxa [%]	rare taxa [%]
+5.0 (water column)	0.018679	18.1428	10.6923	3.6361	0.322318	0.555092	0.0244793	0.246956	0	0	16.472	0.00383597	0.191805	0.00483448	0	0.000623893	7.29276	0.0214273	35.3993	1.97973	0.0576914	0.0240772	0.0881025	0	4.09678	0.728332
0	0.00425532	28.0596	0.204255	0	8.42553	5.75745	0.0425532	0.629787	0	0	3.97872	0.012766	0.0808511	0.587234	0.00425532	0	34.817	0.26383	5.84255	1.42553	0.131915	0	0.00425532	0	8.37872	1.34894
2.5	1.26104	6.92073	8.87799	0.0175314	7.48733	4.40705	0.0204921	14.4949	0	0	12.5737	1.29681	0.79823	0.933759	0.0688594	0	13.9803	0.00730985	7.50466	1.07789	0.909148	0.0237781	0.818523	4.93969	8.93387	2.64632
5	0.586393	13.4731	1.41953	0.0553946	7.75564	9.13456	0.0797865	21.5317	0	0.000364729	12.5893	0.35707	0.580676	0.867417	0.0773519	0.102065	9.87501	0.00977989	8.1692	0.735932	1.35991	0.0269552	0.216934	0.573237	9.5407	0.881932
7.5	0.442396	26.0671	0.0098049	0.0216299	2.9677	17.965	0.286018	1.3531	0	0.215377	7.13144	0.127111	0.225153	2.53322	0.0983611	1.30722	7.20809	0.00953646	14.1344	0.396442	2.29441	0.00230898	0.00537987	0.0612106	14.7425	0.395167
10	2.32439	36.9044	0.0318343	0.000277359	5.33616	8.03038	0.252195	0.920789	0.00420258	0.63377	1.16397	0.532116	0.359846	1.14787	0.857935	0.0873819	10.072	2.05212	5.47105	0.794971	2.19814	0.02843	0.0279286	0	20.5196	0.248238
12.5	2.32484	35.7934	0.0745147	0	3.72213	7.51142	0.204596	1.54108	0.10883	0.730503	1.9983	1.13118	0.224267	1.10191	1.63463	0.485253	9.67959	0.0350071	7.7	0.299942	2.29402	0.102325	0.0958081	0	20.3504	0.85603
15	1.06569	22.0062	0.0431599	0.0641294	3.68894	0.202132	0.393616	0.535959	0.0287934	0.601979	2.89019	0.499859	0.144296	0.219591	0.495973	0.62166	3.58096	42.8488	6.13282	0.0755244	3.49994	0.0544484	0.0390031	0	9.83935	0.426999
17.5	4.68272	30.6908	0.00616025	0.151779	6.20727	0.378923	3.60243	0.2319	0.00132523	0.843736	2.3896	0.176234	0.0537936	0.561923	0.154401	0.0803649	5.77147	1.06675	6.26743	0.193836	5.22809	0.0027816	0.00344983	0	31.0543	0.198537
20	1.9982	12.6865	0.0519556	0.00167278	4.50262	0.0246528	0.894453	0.387408	0.0318858	0.372893	0.961694	0.500343	0.158887	0.304506	0.579525	0.0851447	13.6626	31.5994	15.3228	0.0450033	4.29297	0.0327634	0.0138234	0	11.0615	0.426735
22.5	2.00286	2.92715	0.594463	0.000254197	8.13167	0.00761186	0.389152	0.978117	0.385509	0.400124	0.128284	2.35705	0.000254197	0.0753626	1.85796	1.87285	10.2519	27.2267	15.8099	0.035775	1.14116	0.41294	0.109214	0	21.3109	1.59281
25	1.89588	4.28923	0.0975171	0.000618372	19.6786	0.00455559	0.651909	0.370106	0.327705	0.283221	0.113733	2.33339	0.00246458	0.102483	0.943027	0.739729	9.48789	0.169032	19.941	0.153601	0.89378	0.557869	0.0568011	0.000923106	35.5831	1.32187
27.5	1.65101	12.3823	0.181046	0	14.1586	0.0082491	0.228015	1.43397	0.0660093	0.116664	19.2482	0.535477	1.72872	0.0481613	1.69216	0.792866	13.9196	2.48649	14.0072	0.475503	1.1938	0.118387	0.0778745	0	12.2389	1.21078
30	1.49398	3.30456	1.00302	0.000337495	9.85731	0.00820685	0.0263332	12.7914	0.196104	0.0675836	40.5747	1.47924	0.816015	0.163536	1.15354	1.50351	4.42242	0.0920836	5.70014	0.30472	1.62133	0.384937	0.670511	0.00540915	10.7155	1.64358
32.5	0.195706	0.244501	2.35762	0.506526	1.6687	0.0014604	0.00941739	13.6356	0.0697133	0.00237306	53.8308	0.283084	3.30675	0.0205852	0.329486	1.27158	2.86	2.9268	2.54532	0.279544	0.285017	0.0704867	0.21018	0	12.2135	0.87528
35	0.981471	4.20117	1.61062	0.000335207	9.89133	0.0107142	0.0322476	1.93058	0.112655	0.0171384	7.73692	0.0751073	1.2854	0.00759252	0.0172811	4.12908	3.56843	28.6928	5.35637	0.113753	0.453164	0.011137	0.257322	0.00086423	28.3086	1.19793

## Sheet: Table S6 Active community (RNA)
Depth [cm bsf]	Acidobacteriota [%]	Actinobacteriota [%]	Bacteroidota [%]	Campilobacterota [%]	Chloroflexi [%]	Cyanobacteria [%]	Dependentiae [%]	Desulfobacterota [%]	DTB120 [%]	Entotheonellaeota [%]	Firmicutes [%]	Gemmatimonadota [%]	Halanaerobiaeota [%]	Myxococcota [%]	NB1.j [%]	Nitrospirota [%]	Alphaproteobacteria [%]	Gammaprotebacteria-Halomonas [%]	Gammaproteobacteria [%]	Patescibacteria [%]	Planctomycetota [%]	SAR324 clade Marine group B [%]	Spirochaetota [%]	Synergistota [%]	unclassified taxa [%]	rare taxa [%]
+5.0 (water column)	0.00509901	34.024	0.0611881	0	2.45432	14.2177	0	0.379026	0	0	15.4534	0.0798844	0.00339934	0.328036	0.00169967	0.010198	15.5826	0.557491	2.70247	0.00849834	0.0135973	0	0.00849834	0	13.7435	0.365429
0	0.259581	4.6552	1.36362	0.0238692	2.25552	1.61069	0.00252214	24.5768	0	0.000825266	44.3461	0.548163	0.182038	0.620724	0.0965543	0.0334137	4.62786	0.0228112	5.21323	0.0207157	0.330047	0.0126591	1.38825	0.364874	6.49636	0.947567
2.5	0.176766	15.0211	0.211552	0.0035479	1.84708	4.26394	0	31.6777	0	0.0225979	24.0871	0.347416	0.2049	2.29657	0.180282	0.770128	3.789	0.0151132	4.9667	0.0471218	0.240695	0.00741269	1.57172	0.093709	7.23372	0.92402
5	0.351289	19.7679	0.00910573	0	1.61748	0.090002	0.0255288	6.21868	0	0.506415	14.1141	0.170084	0.0902443	8.86955	0.232608	18.8751	3.61007	0.0149867	8.0336	0.0119311	0.380752	0.00233462	0.00694829	0	16.5462	0.455099
7.5	2.61067	26.0792	0.038098	0	2.23333	0.0975164	0.0949958	2.15953	0.0373534	1.48696	0.971654	0.203386	0.0038665	0.905249	0.508293	1.22575	2.57467	35.6172	8.63939	0.0262329	0.727041	0.201266	0.239974	0.0056312	12.9957	0.317087
10	1.24588	21.4884	2.00907	0.00411264	3.38595	7.26943	0.0217625	1.38237	0.150028	1.49056	8.44892	0.377104	0.00394213	0.997134	0.378266	10.3477	8.59619	0.0375938	16.8383	0.0421323	0.610844	0.154114	0.105127	0.00219793	13.6001	1.01283
12.5	0.0945788	7.52395	0.0186795	0.00742204	0.781808	0.0174558	0.00592345	0.701634	0.0196104	0.148456	1.04004	0.0716734	0.0099962	0.0380897	0.0808168	8.55568	1.07047	60.8042	15.9241	0	0.315436	0.0101003	0.0246554	0	2.68099	0.054259
15	0.741101	26.0936	0.0103097	0.00327866	6.96775	0.152279	0.0775272	0.506345	0.097734	0.690437	0.518107	0.239695	0.00505177	0.311856	0.262347	13.4235	6.80283	8.47837	23.0462	0.00209413	1.37275	0.0385876	0.0100348	0	9.93022	0.218021
17.5	0.108875	2.53734	0.00514754	0.00302236	0.524366	0.00230061	0.00192163	0.248314	0.0780918	0.0676821	0.127626	0.0615607	0.0151829	0.0139229	0.0323478	0.205356	6.98027	42.7664	44.581	0.00142347	0.172038	0.00210514	0.00192971	0	1.43689	0.0249196
20	2.0428	2.59135	0.65891	0.000824912	3.06435	0.0400633	0.00150348	0.51183	1.6552	0.475948	6.88556	4.27781	0.000805282	0.14488	1.10797	2.97447	18.9229	25.0156	19.5024	0.000805283	0.588437	0.851429	0.0224536	0	7.46044	1.20127
22.5	2.60398	2.4051	0.110683	0.0015892	7.04667	0.0111197	0.00227794	0.475101	3.0487	0.427591	0.103056	5.41047	0.000571478	0.601573	1.16565	2.32181	26.5789	0.0281049	30.6401	0.000563507	0.902122	1.95868	0.0498596	0	12.6656	1.44002
25	4.38396	4.86368	0.0533115	0.0128639	11.5371	0.0268856	0.00464628	4.16435	1.33948	0.11342	2.73064	1.42482	0.139283	0.122607	1.78645	2.89167	18.7941	3.22533	35.5565	0.0315848	0.135229	0.112133	0.0863876	0	6.0313	0.432355
27.5	3.23232	2.10529	0.565956	0.0100531	5.70474	0.00660547	0	34.2762	2.78576	0.832769	11.7663	3.23463	0.120465	0.351723	1.08198	10.0739	2.04514	0.190663	5.39732	0.0518322	2.27819	1.13304	0.852275	0.00142092	11.1685	0.73294
30	0.082057	0.0435164	2.66916	1.19727	0.504999	0	0.0011329	11.9994	0.419304	0.022302	39.2686	0.173375	1.60259	0.028011	0.19526	2.65169	1.49345	16.8513	6.97488	0.129029	0.0514144	0.0588308	0.318575	0	12.9377	0.326111
32.5	0.332752	0.351433	0.0923096	0.000894686	1.64	0.000834293	0	5.42435	0.70047	0	3.67689	0.341548	0.0442281	0.0216523	0.016576	9.3526	4.15579	51.81	8.32569	0.000384184	0.0441885	0.0137107	0.235053	0.000384184	13.1027	0.315535
35	0.00959382	4.28004	0.190772	0.0195695	0.0182354	1.93993	0.028582	0.015345	0	0	68.2481	0.000412735	0.0347149	0.00807352	0	0.00242462	13.9166	0.234619	9.1562	0.00456464	0.0142658	0	0	0	1.65153	0.22646

## Sheet: Table S7 Taxa DNA
Order	Genus, notes on habitat	Order_old	Trophy, notes	Air	Function 1	Reference	[cm bsf] +5.0	0.0	ALD_CC_K01_02_a_DNA_Bac	ALD_CC_K01_02_b_DNA_Bac	ALD_CC_K01_02_c_DNA_Bac	ALD_CC_K01_02_d_DNA_Bac	ALD_CC_K01_03_a_DNA_Bac	ALD_CC_K01_03_b_DNA_Bac	ALD_CC_K01_03_c_DNA_Bac	ALD_CC_K01_04_a_DNA_Bac	ALD_CC_K01_04_b_DNA_Bac	ALD_CC_K01_04_c_DNA_Bac	ALD_CC_K01_05_a_DNA_Bac	ALD_CC_K01_05_b_DNA_Bac	ALD_CC_K01_05_c_DNA_Bac	ALD_CC_K01_06_a_DNA_Bac	ALD_CC_K01_06_b_DNA_Bac	ALD_CC_K01_06_c_DNA_Bac	ALD_CC_K01_06_d_DNA_Bac	ALD_CC_K01_07_a_DNA_Bac	ALD_CC_K01_07_b_DNA_Bac	ALD_CC_K01_07_c_DNA_Bac	ALD_CC_K01_08_a_DNA_Bac	ALD_CC_K01_08_b_DNA_Bac	ALD_CC_K01_08_c_DNA_Bac	ALD_CC_K01_09_a_DNA_Bac	ALD_CC_K01_09_b_DNA_Bac	ALD_CC_K01_09_c_DNA_Bac	ALD_CC_K01_10_a_DNA_Bac	ALD_CC_K01_10_d_DNA_Bac	ALD_CC_K01_10_e_DNA_Bac	ALD_CC_K01_11_a_DNA_Bac	ALD_CC_K01_11_b_DNA_Bac	ALD_CC_K01_11_c_DNA_Bac	ALD_CC_K01_11_d_DNA_Bac	ALD_CC_K01_11_e_DNA_Bac	ALD_CC_K01_12_a_DNA_Bac	ALD_CC_K01_12_b_DNA_Bac	ALD_CC_K01_12_c_DNA_Bac	ALD_CC_K01_13_a_DNA_Bac	ALD_CC_K01_13_b_DNA_Bac	ALD_CC_K01_13_c_DNA_Bac	ALD_CC_K01_14_a_DNA_Bac
unknown taxa							4.09678	8.37872	6.67003	9.04209	8.40493	9.35459	11.919	9.73567	6.96743	15.7508	13.8897	14.5869	20.8958	19.6279	21.0351	18.8817	19.6162	20.2583	21.1768	10.7967	9.25349	9.46789	29.2549	30.2451	33.6629	10.3631	9.41781	13.4038	16.3883	25.5329	22.0114	43.03	37.0714	47.9957	24.1807	25.6376	13.3079	9.63614	13.7728	10.8071	10.6594	10.68	13.8034
Bacteria; Proteobacteria; Gammaproteobacteria; Oceanospirillales	Halomonas (8.75), Salinicola (1.0), Chromohalobacter (0.56), Marinobacterium (0.44)	Proteobacteria - Gammaproteobacteria - Oceanospirillales	heterotroph, halotolerant/halophil (NaCl up to 32%), pH 6-10	aerobe/opt anaerobe	denitrification (possible when anaerob)	Vreeland et al. in Bergey´s Manual (2015); Long et al., 2013	15.2544	0.26383	0.0462175	0.0245253	0.0473784	0.0708085	0.0218838	0.0185277	0.0189161	0.0080423	0.00968885	0.0139629	3.3982	2.06522	0.838443	0.0412007	0.0847986	0.0764264	0.0605435	43.4788	50.7211	48.2447	0.481731	1.89837	0.836468	45.7902	46.2968	37.4086	47.8421	23.2944	15.8931	1.43457	1.4439	1.30262	4.04551	2.97047	4.49501	2.91519	2.08641	0.458366	0.665202	0.664721	7.4865
Bacteria; Actinobacteriota; Acidimicrobiia; Actinomarinales		Actinobacteria - Acidimicrobiia - Actinomarinales	photoheterotroph (actinorhodopsin)	facultative aerobe	aerobic respiration	Mizuno et al., 2015	0.0125032	3.6766	2.97893	2.64099	2.13834	2.99756	10.1245	11.4526	3.39544	18.6139	19.8178	18.9799	27.6555	30.3342	29.4034	35.4797	30.2437	26.1484	23.8003	18.0888	17.9538	17.2301	22.6863	26.1753	22.7154	10.8049	9.21794	8.56503	1.10903	1.00634	1.31318	1.44907	2.06845	1.44736	1.35466	1.34643	12.7778	7.95769	8.66526	3.02004	1.98649	2.6898	0.149468
Bacteria; Desulfobacterota; Desulfovibrionia; Desulfovibrionales	Desulfovibrio (5.6), Halodesulfovibrio (0.22), Desulfocurvus (0.13)			strict anaerob	sulfate-reduction	Van der Maarel et al., 1996; Stams et al., 1985	0.0478992	0.548936	10.0229	10.3174	8.08275	11.45	9.83346	10.7732	37.3656	0.142751	0.602093	0.338331	0.00114882	0.00166416	0.00482789	0.423779	0.685311	0.650942	0.630101	0.0679179	0.0574103	0.0906246	0	0.00218455	0	0.00915667	0.0109024	0.062425	0	0.00396197	0.00076259	0	0.00618372	0.0188786	0	0.00347017	0.53003	0.584949	0.696868	13.0109	10.4984	7.82207	12.447
Bacteria; Firmicutes; Clostridia; Peptostreptococcales-Tissierellales	Fusibacter (1.92), Paramaledivibacter (1.37), Peptoclostridium (0.32), Tepidibacter (0.18)			anaerobe	Sulfate-reduction/ fermentation	Fadhlaoui et al., 2015; Ravot et al., 1999	1.85709	2.87234	8.60906	10.9383	11.1118	9.81616	8.15279	6.16477	8.90003	4.74094	6.51368	3.70553	0.529605	0.321182	0.374966	1.02806	0.614357	0.745816	1.41493	1.8202	1.11689	2.3405	0.889978	0.471863	0.562422	0.334218	0.305266	0.420968	0.0200428	0.0277338	0.0427051	0.043472	0.0340105	0.0125857	0.0230776	0.020821	10.1906	25.2626	21.6197	37.28	32.1585	28.8922	25.6712
Bacteria; Proteobacteria; Gammaproteobacteria; Vibrionales	Photobacterium (1.95), Salinivibrio (1.33), Vibrio (1.20)		chemoorganoheterotroph	facultative aerobe	aerobic respiration	Farmer in Bergey´s Manual (2015)	0.0724444	3.11915	0.0441167	0.0555046	0.00947568	0.0603184	4.64373	3.44491	1.10974	2.00655	3.24576	2.08477	1.43028	1.14577	1.16996	1.08888	2.18919	2.22164	2.85227	0.117724	0.106122	0.124013	1.14309	2.07532	1.93265	1.13085	1.0648	2.10004	7.19535	3.12995	1.60449	0.550645	0.865721	0.352401	0.270008	0.222091	8.43656	6.57292	5.94171	1.35957	1.81538	3.11878	1.0304
Bacteria; Proteobacteria; Gammaproteobacteria; Alteromonadales	Marinobacter (2.98), Pseudoalteromonas (0.21), Halotolerant, need sodium to grow	Proteobacteria - Gammaproteobacteria - Alteromonadales	chemoorganoheterotroph, complex lifestyle, aerobic & Denitrification possible	anaerobe	anaerobic respiration	Bowman in Bergey´s Manual (2015)	3.91359	0.00851064	0.00630239	0.0322701	0.0221099	0.034093	0.0251663	0.0123518	0	0	0	0	0	0	0.00321859	0.00784775	0.0103835	0	0.00672706	0	0.0156573	0.0128782	0	0.00218455	0	1.02555	1.01937	2.93077	2.37173	3.41521	5.93219	2.20258	4.41208	3.16531	12.3835	10.0566	5.38083	4.73928	5.85998	1.55253	2.24873	2.01735	0.352185
rare taxa							4.61634	2.91915	2.93271	4.8573	6.6235	6.41735	3.45654	3.70553	3.73593	3.50443	4.83889	4.2909	4.68028	4.66047	4.92605	4.11222	5.08272	5.26025	5.89739	2.49032	2.15028	2.27229	1.93101	1.78041	1.75354	1.50627	1.39914	1.7447	1.50989	5.84786	7.4589	1.01435	2.36836	2.43534	7.17484	7.90159	3.30756	3.1444	4.57942	5.36289	4.66553	5.24048	2.43634
Bacteria; Proteobacteria; Alphaproteobacteria; Rhizobiales	Nesiotobacter (0.62), Labrenzia (0.5), Dichotomicrobium (0.37), Methyloceanibacter (0.33)	Proteobacteria - Alphaproteobacteria - Rhizobiales	chemoheterotroph (methylotroph)	strict aerobe	aerobic respiration	Doronina et al., 2013	0.0463065	1.56596	0.468478	0.277523	0.120025	0.19669	1.89185	1.99111	0.353101	3.56475	2.98555	3.13628	2.62964	2.41968	2.35601	4.85972	3.29503	3.18092	3.30074	1.16819	1.04382	1.1185	3.83344	3.20037	4.24503	2.28917	2.39125	4.05442	0.855158	1.34113	2.10322	1.59397	2.55388	3.36669	4.52552	4.64656	4.63703	8.3779	4.31324	0.967005	1.0297	1.47244	2.01128
Bacteria; Nitrospirota; Thermodesulfovibrionia; uncultured		Nitrospirae - Thermodesulfovibrionia - uncultured	lithotroph	aerobe	sulfate-reduction	Kadnikov et al., 2018	0	0	0	0	0	0	0.133491	0.108696	0.0315268	1.78941	0.70175	1.4124	0.037911	0.0332831	0.0257487	0.204042	0.299391	0.33733	0.320657	0.588621	0.483638	0.539932	0.142886	0.0502447	0.035823	0.0206025	0.0472435	0.040016	0.247194	0.762678	0.912821	0.0652079	0.244257	0.251715	0.690021	0.725266	0.500747	0.678063	1.05421	1.1814	0.96591	1.10336	1.18827
Bacteria; Proteobacteria; Alphaproteobacteria; Rhodobacterales	Tropicimonas (1.07), Roseivivax (0.28), Jhaorihella (0.17)		photo(hetero-)troph under anox. conditions with light, chemotroph without light (Denitrification), like freshwater	aerobe	photoheterotroph	Shin, 2012; Imhoff et al. in Bergey´s Manual (2015)	3.8761	15.5021	29.6611	16.5881	8.45231	9.22347	8.93404	9.02174	2.06501	1.47576	1.73569	2.06114	0.0516968	0.0515889	0.0659811	0.100059	0.103835	0.158124	0.156965	0.06339	0.0330544	0.0538978	0.0979792	0.0895666	0.121798	0.0251808	0.00363412	0.0128051	0.167023	0.2813	0.424	0.0289813	0.13295	0.151029	0.103849	0.156158	0.0658877	0.0214879	0.00943129	0.0657977	0.0566991	0.0541052	0.010276
Bacteria; Firmicutes; Clostridia; Lachnospirales	Vallitalea (1.37), Defluviitalea (0.6), uncultured		organoheterotroph	anaerobe	fermentation	Schouw et al., 2018	0.401733	0.0297872	0.128149	0.0903564	0.129501	0.118014	0.561318	0.424901	10.117	0.116613	0.192393	0.0784069	0.0953519	0.0698946	0.0691997	0.669021	0.124602	0.13704	0.150238	0.156211	0.109601	0.113996	0.0408247	0.0152919	0.035823	0.00228917	0.00545118	0.0192077	0	0.0118859	0.00228777	0	0	0	0.00230776	0.00347017	0.00146417	0.0477509	0.0492523	0.494592	11.0411	10.6529	20.1371
Bacteria; Chloroflexi; Anaerolineae; Anaerolineales	ADurb.Bin120	Chloroflexi - Anaerolineae - Anaerolineales	chemoheterotroph (carbohydrate hydrolysis/ carb fermentation)	facultative anaerobe/strict anaerobe	fermentation	Hug, 2013; Xia, 2016; Andersen, 2019	0.0412269	0.0680851	1.42854	2.7236	2.19836	1.91708	2.80769	2.479	2.23525	1.09978	1.16543	1.33292	3.67277	3.06704	3.254	0.729841	1.31697	1.39676	0.688403	2.0647	1.58661	1.14521	5.84201	4.6378	3.2187	2.96447	2.77828	1.69988	2.13789	0.576466	0.986029	2.74598	1.30167	1.504	1.03157	1.17986	8.39995	2.02464	3.99992	3.03557	2.01282	2.62024	0.55677
Bacteria; Cyanobacteria; Cyanobacteriia; Synechococcales	Synechococcus MBIC10613 (1.58), Schizothrix LEGE 07164	Cyanobacteria - Oxyphotobacteria - Synechococcales	phototroph	aerobe	oxygenic photosynthesis	Flombaum et al., 2013	0.0609404	3.39574	7.15321	4.79018	2.93746	2.38651	9.02377	11.3809	4.02283	17.1784	17.3417	19.083	6.61604	8.69272	8.60812	2.90955	5.26616	8.53077	8.57476	0.147155	0.186148	0.186496	0.310267	0.425987	0.283002	0.0343375	0.0199876	0.00480192	0	0.00396197	0.00152518	0	0.0123674	0	0	0.00694035	0.00292834	0.00477509	0.00419169	0.0051751	0.00506242	0.00579699	0
Bacteria; Proteobacteria; Alphaproteobacteria; Tistrellales	Geminicoccaceae		photoheterotroph (AAP)	aerobe	aanyxygenic photosynthesis &heterotrophy	Burganskaya et al., 2018	0.00236932	1.32766	0.201676	0.209111	0.388503	0.212426	0.311843	0.290267	0.0914279	0.772061	0.54396	0.528441	5.94973	5.32114	5.67277	4.52031	3.79171	3.99262	3.25814	2.07602	1.44743	1.52488	1.62074	0.891297	0.664517	0.533376	0.425192	0.328131	1.39631	3.01109	3.54071	0.499928	0.853353	0.780316	2.12545	2.54364	0.726229	0.544361	0.60989	1.28195	0.805937	1.21544	0.0084076
Bacteria; Proteobacteria; Gammaproteobacteria; Coxiellales	Coxiella		heterotroph		parasitic/predatory	Drancourt in Bergey´s Manual (2015)	0.0222689	0.0382979	0.0021008	0.00129081	0	0	0.0656513	0.0617589	0.00630537	0.904759	0.660226	0.749699	0.798428	0.625723	0.558425	0.616049	0.892981	0.927658	0.798278	0.412035	0.379256	0.328634	3.07001	3.4778	3.50349	0.267833	0.258022	0.32493	3.26697	3.58756	1.65101	23.9531	8.15942	9.06803	2.11622	2.84554	0.53003	0.0358132	0.067067	0.0709728	0.0465743	0.0560376	0.0084076
Bacteria; Firmicutes; Bacilli; Bacillales	Pontibacillus (0.7), Bacillus (0.48), Halobacillus (0.06)	Firmicutes - Bacilli - Bacillales	heterotroph, optimal growth in 2-9 % NaCl	strict aerobe		Lim et al., 2005	1.0405	0.161702	0.172265	0.092938	0.0442198	0.0393381	0.474877	0.413785	0.0630537	1.49386	1.06162	0.876439	0.212531	0.119819	0.146446	0.366882	0.254396	0.150217	0.192842	0.199226	0.109601	0.111611	0.0408247	0.0546138	0.103887	0	0.0109024	0.0112045	0	0.0198098	0.00305036	0.0869439	0	0	0.0138466	0.0173509	0.0204984	0.00477509	0.00943129	0.0118288	0.00404994	0.00966165	0.0121443
Bacteria; Firmicutes; Clostridia; Clostridiales	Clostr. Sensu stricto 1/18/7 (0.71), Oceanirhabdus (0.17)	Firmicutes - Clostridia - Clostridiales	heterotroph (acetogenesis)	Strict anaerobe	fermentation	Vavourakis, 2018	0.180718	0.621277	0.434865	0.783519	0.893872	0.645144	0.225403	0.172925	0.0378322	0.124656	0.15779	0.0848513	0.0654826	0.0441001	0.0627625	0.064744	0.0796068	0.0711556	0.0896941	0.06339	0.0278353	0.0486511	0.0163299	0.0131073	0	0.0068675	0.00363412	0.0080032	0	0	0.00228777	0	0	0	0	0	0	0	0	0.0051751	0.00202497	0.00193233	0.015881
Bacteria; Proteobacteria; Alphaproteobacteria; Rhodospirillales	Terasakiella (0.65), Aestuariispira (0.31)		heterotroph	facultative (an)aerobe			0.273562	0.0212766	0.00840318	0.0103264	0.0379027	0.0131127	0.00656513	0.00741107	0.0220688	0	0.00138412	0	0.00689291	0.00166416	0	0.0196194	0.0121141	0.0263539	0.0134541	0.0701818	0.0365338	0.399225	0	0	0.00179115	7.67787	11.6328	10.7211	1.84393	2.99326	5.36025	0.724533	1.42844	1.05091	4.35013	2.67203	4.07625	9.80327	5.38108	0.504203	0.854536	0.883075	0.766026
Bacteria; Actinobacteriota; Actinobacteria; Euzebyales	Euzebya		chemoorganotroph, lives in sea cucumbers		fermentation	Kurahashi et al., 2010	0.00261975	3.48936	1.42224	0.597643	0.309539	0.388136	1.50123	1.61438	0.296352	1.22846	0.854003	0.893624	2.01732	1.56431	1.73321	2.21699	1.34812	1.47582	1.44183	0.928211	0.581062	0.662991	0.440906	0.305837	0.300913	0.0389159	0.0454265	0.0448179	0.0601283	0.0396197	0.0289784	0.021736	0.0278267	0	0.0115388	0.00347017	0.0966353	0.0214879	0.0408689	0.07393	0.0303745	0.0618346	0
Bacteria; Chloroflexi; Dehalococcoidia; S085	closest blast hits: deep sea sediment, anoxic cave water		chemoorganoheterotroph, organohalide respiration	facultative anaerobe	fermentation	Biderre-Petit et al., 2016	0.00118466	0	0	0	0	0.00524508	0.0131303	0.00617589	0	0.0341798	0.0262983	0.0332961	0.189555	0.237974	0.243004	0.309986	0.489755	0.442746	0.5718	0.20149	0.269654	0.253272	0.518473	0.546138	0.478238	0.842414	0.83403	0.94918	3.42063	3.62718	4.44056	8.78858	20.6474	13.0325	11.4488	10.2509	3.33538	2.44007	2.49196	0.893075	0.641915	0.859887	0.248491
Bacteria; Campilobacterota; Campylobacteria; Campylobacterales	Malaciobacter		heterotroph			Pérez-Cataluña et al., 2018	3.6361	0	0.0441167	0.0283977	0.0189514	0.00524508	0.0656513	0.0469368	0.0535956	0.0321692	0.0166095	0.016111	0	0.000832078	0	0	0	0	0	0.0520704	0.0434926	0.0968253	0.122474	0.137627	0.195236	0	0.00181706	0.00320128	0	0	0.00076259	0	0.00309186	0	0	0	0	0	0	0	0.00101248	0	0.94819
Bacteria; Actinobacteriota; Acidimicrobiia; Microtrichales	Ilumatobacter	Actinobacteria - Acidimicrobiia - Microtrichales	chemoorganoheterotroph, reported in estuary sediment, marine conditions favored (salinity 3.8%, pH 7-11)	aerobe/microaerophil	aerobic respiration	Matsumoto et al., 2009	0.137841	8.06383	1.87601	1.2069	0.546431	0.85757	1.3743	1.58473	0.327879	1.61047	1.97099	2.01065	1.82547	2.60024	2.3029	2.48578	2.96795	2.27171	2.26253	1.15913	1.07688	1.2821	1.17983	1.22772	1.24127	0.505906	0.550569	0.715486	0.36077	0.505151	0.580331	0.702797	0.800792	0.434208	0.606942	0.576049	1.48174	1.21765	1.32038	0.235098	0.203509	0.284052	0.00747342
Bacteria; Proteobacteria; (former Beta-)Gammaproteobacteria; Burkholderiales	Cupriavidus (0.41), GKS98 freshwater group (0.24), Ralstonia (0.08)		chemoorganotroph, degradation of aromatic compounds		fermentation	Pérez-Pantoja et al., 2012	11.5485	0	0	0	0.00631712	0	0.0087535	0.00370553	0	0.00201058	0.00138412	0.00966661	0.0241252	0.00249623	0.00804648	0.0372768	0.0173058	0.00790618	0.0156965	0.0271671	0.0365338	0.0138322	0.0326597	0.0152919	0.0179115	0.0206025	0.00545118	0.00320128	0.0334046	0.0178288	0.0396547	0.854949	0.0927558	0.144736	0.0369242	0.0416421	0.051246	0.00238755	0.00943129	0.0110895	0.00506242	0.011594	0
Bacteria; Chloroflexi; Anaerolineae; SBR1031		Chloroflexi - Anaerolineae - SBR1031	chemoheterotroph (carbohydrate hydrolysis/ carb fermentation)	facultative anaerobe/strict anaerobe	fermentation	Hug, 2013; Xia, 2016; Andersen, 2019	0.21891	0.157447	0.821411	2.42542	3.247	3.07099	1.30208	1.43651	1.47546	0.639363	0.646385	0.676663	0.318223	0.331167	0.331515	0.11183	0.218053	0.266175	0.195085	0.31695	0.264435	0.325772	0.118392	0.0589829	0.0465699	0.0915667	0.0763165	0.0656263	0.280599	1.05784	1.51679	0.130416	0.48233	0.616701	1.35004	1.74203	1.27969	3.38554	2.2939	3.70833	3.91224	5.14193	0.244755
Bacteria; Gemmatimonadota; BD2-11 terrestrial group; uncultured bacterium		Gemmatimonadetes - BD2-11 terrestrial group - uncultured bacterium	photoheterotroph (ABC)	aerobe/ microaerophil	aerobic respiration	Janssen, 2006; Baker et al., 2015	0.00202742	0.00851064	0.153358	0.455654	1.03917	0.941491	0.052521	0.0531126	0.362559	0.0623278	0.0318348	0.0622959	0.152793	0.118155	0.122306	0.376692	0.605704	0.53762	0.827428	0.323742	0.323585	0.262811	0.0204123	0.0458756	0.0197027	0.363978	0.294363	0.182473	0.427579	1.70166	2.47766	0.239096	0.510157	0.560065	2.04237	2.80737	0.143489	0.195779	0.303897	1.15774	0.999322	1.04926	0.257833
Bacteria; Proteobacteria; Gammaproteobacteria; Nitrosococcales	AqS1 (0.21) ,Inmirania (0.17), FS142-36B-02 (0.11)		heterotroph, aerobic ammonia oxidizer	aerobe	aerobic respiration	Dohra et al., 2019	0.239934	0.47234	0.220584	0.0709943	0.050537	0.0865438	0.597426	0.566947	0.0914279	1.01735	0.63808	0.614367	0.93284	0.644029	0.793383	1.16735	1.14738	1.00936	1.1436	0.393924	0.334023	0.321479	0.485813	0.270884	0.383306	0.153374	0.118109	0.10084	1.93079	2.69612	2.21227	0.384002	0.383391	0.409037	1.10542	1.60322	0.339688	0.078789	0.183386	0.326032	0.282483	0.351684	0.0354988
Bacteria; Proteobacteria; Gammaproteobacteria; Enterobacterales	Escherichia-Shigella	Proteobacteria - Gammaproteobacteria - Enterobacteriales	chemoorganotroph	facultative anaerobe	fermentation	Leung et al., 2014	0.00249557	0	0.00630239	0.00258161	0	0.00786761	0	0	0	0	0	0.0032222	0	0.00582455	0	0.00980969	0.0224976	0.00790618	0.00672706	0	0.00173971	0	0	0.0087382	0.0447788	0	0.0127194	0.00160064	0	0.00198098	0.00457554	0	0	0	0.00461553	0.00347017	0	0	0.00314376	0	0	0.00193233	0
Bacteria; Desulfobacterota; Desulfobacteria; Desulfobacterales	Desulfosarcinaceae (0.28), Desulfolunaceae,: Desulfobacter (0.06)	Proteobacteria - Deltaproteobacteria - Desulfobacterales	chemoorganotroph/lithohetero/litoautotroph	anaerobe	sulfate-reduction	Foti et al., 2007; Vavourakis et al., 2018	0.0130672	0.0595745	1.11552	1.96073	4.12192	2.93724	0.761555	0.83498	1.55743	0.0321692	0.0982726	0.0343702	0.127519	0.134797	0.130353	0.133412	0.276893	0.224008	0.363261	0.0860293	0.142656	0.0834701	0.0530721	0.0524292	0.0250761	0.096145	0.0908529	0.145658	0.0935329	0.279319	0.323338	0.0289813	0.0494697	0.050343	0.136158	0.173509	0.342616	0.191004	0.447462	0.797705	0.63989	0.740082	0.400762
Bacteria; Actinobacteriota; Thermoleophilia; Solirubrobacterales			chemoheterotroph	aerobe		Hu et al., 2019	0.00199586	0.0297872	0.010504	0.00387242	0	0	0.0503326	0.0716403	0.0126107	0.144761	0.137028	0.153592	0.593939	0.718084	0.621188	1.63626	1.45023	1.41521	1.53153	0.953114	0.763731	0.78128	2.20453	1.61875	1.96489	1.08507	0.848566	1.12205	0.334046	0.406101	0.409511	1.06506	0.995579	0.918759	0.500785	0.555228	0.847755	0.331869	0.4789	0.421401	0.14276	0.193233	0.0597874
Bacteria; Chloroflexi; JG30-KF-CM66; uncultured bacterium		Chloroflexi - JG30-KF-CM66 - uncultured bacterium	heterotroph	facultative aerobe	aerobic respiration		0.00118466	0	0	0	0	0.00786761	0.00109419	0.00247036	0	0.0261375	0.0359872	0.0354442	0.17462	0.286235	0.29772	0.276633	0.47418	0.397944	0.522468	0.987073	1.40568	1.08511	0.575628	0.784254	0.721834	0.675304	0.663226	0.656263	0.835115	1.22821	1.29412	1.50703	4.6316	3.09609	3.20779	3.16827	3.88006	3.21841	3.76623	1.67525	1.41039	1.55939	0.500719
Bacteria; Proteobacteria; Gammaproteobacteria; uncultured							0.00196429	0.182979	0.193273	0.14457	0.195831	0.128504	3.23114	3.19788	0.835461	8.61331	7.36076	9.71279	1.4073	1.34713	1.46446	0.706298	1.10411	1.37304	1.36335	0.0792375	0.0556706	0.084901	0.122474	0.166026	0.188071	0	0.00181706	0.00320128	0	0.0316957	0.00915108	0.0579626	0.0742046	0.0755144	0.0207699	0.0277614	0.251838	0.0907268	0.162428	0.237315	0.13061	0.148789	0.000934178
Bacteria; Planctomycetota; Planctomycetes; Pirellulales		Planctomycetes - Planctomycetacia - Pirellulales	heterotroph	aerobe/anaerobe	anaerobic respiration (anammox)	Gloeckner et al., 2003; Lage et al., 2014	0.0392617	0.0340426	0.352934	0.405313	0.448515	0.553356	1.36445	1.16848	0.384628	2.02063	1.96684	1.73569	1.61064	1.40205	1.53688	1.15951	1.15949	1.66293	1.32299	3.32798	1.59009	2.82224	2.63727	1.71924	2.41805	1.05988	0.814042	1.36054	0.133618	0.249604	0.488058	0.0796986	0.0680209	0.0943931	0.230776	0.291495	0.825793	0.248305	0.555398	1.37066	0.898073	0.811579	0.204585
Bacteria; Actinobacteriota; Actinobacteria; Nitriliruptorales	moderately salt tolerant, lives in soda lakes		heterotroph, Aquiluna often found in freshwater environments	aerobe	aerobic respiration	Sorokin et al. , 2009	0.543855	7.4383	2.96422	1.81745	1.22552	1.79644	1.20032	1.30435	0.343643	0.438305	0.460912	0.462923	0.141305	0.21218	0.193115	0.255052	0.280354	0.355778	0.34308	0.0860293	0.0330544	0.0605754	0.0571545	0.0218455	0.0411965	0.0068675	0.00363412	0.00960384	0.00668092	0.0138669	0.0122014	0	0.00618372	0.00629287	0.00461553	0.00347017	0.0102492	0	0.00314376	0.0044358	0.00303745	0	0
Bacteria; Actinobacteriota; Actinobacteria; Micrococcales	Microbacteriaceae: Cand. Aquiluna (0.22), ML602J-51 (0.09)	Actinobacteria - Actinobacteria - Micrococcales	heterotroph	aerobe	aerobic respiration	Zhu et al., 2016	16.1429	0.0553191	0.00420159	0	0.00315856	0.00262254	0.00656513	0.00370553	0	0.00603173	0.00553649	0.0032222	0.00459527	0.00665663	0.00804648	0.00392388	0.00519175	0.00527079	0.00224235	0.00905572	0.00695882	0.0147861	0.0244948	0.00655365	0.0125381	0.0068675	0.00363412	0.0080032	0.0133618	0.00990491	0.00457554	0.0507173	0.0278267	0.0251715	0.00230776	0	0.0117134	0	0.00314376	0.0044358	0.00404994	0.00579699	0
Bacteria; Proteobacteria; Alphaproteobacteria; uncultured		Proteobacteria - Alphaproteobacteria - uncultured	heterotroph	aerobe	aerobic respiration		0.0212683	15.4213	2.55667	1.08944	1.20973	0.883795	0.87535	0.823864	0.252215	0.494602	0.521814	0.619737	0.805321	1.10666	1.08788	1.14185	1.36543	1.66557	1.37681	0.289783	0.193107	0.25518	0.159216	0.113597	0.0537346	0.0320483	0.0254388	0.0208083	0.0935329	0.669572	1.25217	0.0796986	0.185512	0.302058	1.23927	1.27355	0.0190342	0.026263	0.0429648	0.0384436	0.0263246	0.0483082	0.0112101
Bacteria; Actinobacteriota; Acidimicrobiia; IMCC26256		Actinobacteria - Acidimicrobiia - IMCC26256	heterotroph	aerobe	aerobic respiration		0.000592329	0.0595745	0.0504191	0.0232345	0.00947568	0.0236028	0.345763	0.45084	0.0693591	1.11788	1.25263	1.13744	0.897227	1.31136	1.16674	2.09535	1.57137	1.43102	1.04045	0.946322	0.899428	0.798451	1.89018	1.48113	1.77503	0.647834	0.595995	0.592237	0.180385	0.208003	0.17082	0.210114	0.213338	0.163615	0.0900028	0.111046	0.15081	0.164741	0.134134	0.130117	0.0587241	0.0927518	0.0214861
Bacteria; Cyanobacteria; Cyanobacteriia; Cyanobacteriales	Stanieria PCC-7437 (0.11), Arthrospira PCC-7345 (0.10), Cyanobacterium CLg1(0.07),Pleurocapsa PCC-7319 (0.06),		phototroph	aerobe	oxygenic photosynthesis	Castenholz in Bergey´s Manual (2015)	0.118672	2.04255	0.733178	0.829988	0.628553	0.456322	1.25175	1.04373	0.296352	0.0321692	0.034603	0.0193332	0.012637	0.00665663	0.0128744	0.0215813	0.0138447	0.0210831	0.00672706	0.00679179	0	0.00286183	0.0244948	0	0.0143292	0	0.00181706	0	0	0	0	0	0	0	0	0	0	0	0	0.0007393	0	0	0
Bacteria; Halanaerobiaeota; Halanaerobiia; Halanaerobiales	Halanaerobium (0.24), Halocella (0.1), Orenia (0.09)		chemoorganotroph, halophil/halotolerant, found in soda lakes	anaerobe	(sugar-) fermentation	Roush et al., 2014	0.191805	0.0808511	0.798303	1.12945	0.609602	0.655635	0.629158	0.422431	0.690438	0.289523	0.217307	0.168629	0.499736	0.257944	0.321859	0.292329	0.176519	0.20029	0.295991	0.17885	0.0956838	0.158355	0.0816493	0.0349528	0.0447788	0.132772	0.172621	0.171269	0	0	0.00076259	0	0.00309186	0	0.00923105	0	1.65451	1.48505	2.04659	0.867939	0.642927	0.93718	4.3841
Bacteria; Proteobacteria; Alphaproteobacteria; Caulobacterales	Caulobacter		heterotroph, do not grow in media with NaCl >2%	aerobe	aerobic respiration	Poindexter in Bergey´s Manual (2015)	0.0367334	0.012766	0.00840318	0.0116173	0.0157928	0.0262254	0	0	0.00315268	0	0	0	0.0160835	0.0133133	0.00965577	0.00980969	0.0121141	0.0158124	0.0156965	0.00226393	0.00521912	0.00190789	0	0.00218455	0.0035823	0.00228917	0	0.00160064	0.0133618	0.0257528	0.029741	0.21736	0.0247349	0.0188786	0.0323087	0.00347017	0.00439252	0	0.00314376	0.0007393	0.00101248	0.00193233	0.0457747
Bacteria; Nitrospirota; Nitrospiria; Nitrospirales	Nitrospira	Nitrospirae - Nitrospira - Nitrospirales	litoautotroph	aerobe	denitrification	Cleary et al., 2015	0.000623893	0	0	0	0	0	0.00328256	0.00123518	0	0.0180952	0	0	0.0471015	0.0482605	0.0402324	0.096135	0.134985	0.115957	0.143511	0.0724457	0.0574103	0.0662991	0.00816493	0.00218455	0.00179115	0.0503617	0.063597	0.0208083	0.327365	1.28962	2.02544	0.021736	0.108215	0.163615	0.627712	0.704445	0.0219626	0.0477509	0.0712587	0.455409	0.370569	0.417383	0.0392355
Bacteria; Chloroflexi; Dehalococcoidia; SAR202 clade			chemoorganotroph, sponge associated (Applysina spp., marine sponge), high abundance in mesopelagic ocean	aerobe		Bayer et al., 2018; Schattenhofer et al., 2009	0.000779636	0	0	0	0	0	0	0.00123518	0	0.00603173	0.00138412	0.00429627	0.171174	0.109002	0.140009	0.149107	0.140177	0.139676	0.141268	0.131308	0.106122	0.110657	0.0367422	0.0502447	0.0608992	0.123615	0.12356	0.0720288	0.120257	0.46355	0.571943	0.202869	0.386482	0.339815	1.11696	1.37072	0.0995637	0.0429758	0.053444	0.183347	0.17921	0.119804	0.0289595
Bacteria; DTB120; uncultured bacterium;	related to Deltaproteobacteria, function unknown		chemoorganotroph, acetate as electron donor	anaerobe (?)	fermentation	Nepomnyashaya et al., 2010; Makita, 2016	0	0	0	0	0	0	0	0	0	0	0	0	0.00689291	0.00249623	0.00321859	0.0725917	0.0847986	0.086968	0.154722	0.0249032	0.0400132	0.0214637	0	0.00218455	0.00179115	0.0503617	0.03089	0.0144058	0.080171	0.475436	0.600921	0.0724533	0.173144	0.0943931	0.66002	0.638512	0.0614952	0.0453634	0.0911692	0.257277	0.182247	0.148789	0.0784709
Bacteria; Bacteroidota; Bacteroidia; Flavobacteriales	Robiginitalea (0.1), Cryomorphaceae (0.1)	Bacteroidetes - Bacteroidia - Flavobacteriales	chemoorganotroph (carbohydrate hydrolysis)	aerobe/ facultative anaerobe	aerobic respiration	Alderkamp, 2006	8.72636	0.0553191	1.0441	2.70682	2.21731	3.27293	0.20899	0.284091	0.911126	0.0080423	0.00276824	0.0032222	0.00574409	0.00582455	0	0.0117716	0.0121141	0.00263539	0.0179388	0.00226393	0.00521912	0.00286183	0	0	0.00179115	0.00228917	0	0	0.300641	0.441759	0.739713	0	0.00309186	0	0.0230776	0.0312316	0.00439252	0.00238755	0.00419169	0.0022179	0.00506242	0.00193233	0
Bacteria; Proteobacteria; Alphaproteobacteria; Kiloniellales	Kiloniellaceae		heterotroph, mesophil, antifungal, marine, opt growth at 3% NaCl	aerobe	aerobic respiration	Wiese et al., 2019	0.0091985	0.012766	0.0378143	0.0516322	0.26216	0.19669	0.200236	0.195158	0.0567483	0.693649	0.662994	0.611145	0.0930542	0.0940248	0.111041	0.38454	0.410148	0.358413	0.41932	0.156211	0.12004	0.134506	0.567463	0.611674	0.583915	0.135061	0.0963041	0.251301	0.187066	0.810222	1.07602	0.152152	0.337013	0.352401	0.842334	0.909186	0.306012	0.229204	0.365725	0.29572	0.299695	0.343955	0.212993
Bacteria; Spirochaetota; Spirochaetia; Spirochaetales	Sediminispirochaeta (0.15), Spirochaeta 2 (0.05), Salinispira (0.03)	Spirochaetes - Spirochaetia - Spirochaetales	chemoorganoheterotroph	Strict anaerobe/ facultative anaerobe	sulfate-reduction	Dubinina et al., 2011	0.0865432	0.00425532	0.128149	0.539557	1.10865	0.786761	0.0514268	0.0704051	0.526498	0.00201058	0.00553649	0.00859254	0.0344645	0.031619	0.0177022	0.0510104	0.083068	0.0922388	0.112118	0.06339	0.0226162	0.0305262	0.00816493	0.00218455	0	0.0114458	0.0236218	0.00640256	0.0400855	0.103011	0.184547	0	0.00618372	0.00629287	0.122311	0.145747	0.0556385	0.0501385	0.127846	0.720079	0.64799	0.643466	0.196177
Bacteria; Proteobacteria; Alphaproteobacteria; Defluviicoccales			chemoorganotroph (phosphate accumulators)	aerobe/anaerobe	anaerobic respiration	McIlroy et al., 2009	0.000779636	0.314894	0.0273104	0.0477598	0.0347442	0.0445831	0.105042	0.129694	0.0252215	0.0965076	0.0761267	0.109555	0.587046	0.606585	0.719355	0.237395	0.361692	0.284622	0.340838	0.0792375	0.0939441	0.0686839	0.061237	0.0327683	0.0125381	0.05494	0.06178	0.0448179	0.300641	1.10143	1.38944	0.44921	0.491606	0.63558	1.77467	1.86001	0.325046	0.312769	0.586836	0.684592	0.685452	0.722691	0.443734
Bacteria; Entotheonellaeota; Entotheonellia; Entotheonellales	Candidatus Entotheonella		heterotroph, sponge associated (jaspis splendens, marine sponge)	aerobe	aerobic respiration	de Voogd et al., 2017	0	0	0	0	0	0	0.00109419	0	0	0.382009	0.15779	0.106333	0.813363	0.563317	0.52463	1.08888	0.726845	0.769535	0.69513	0.819542	0.478419	0.507975	1.33497	0.58546	0.610783	0.446388	0.336156	0.336134	0.427579	0.36252	0.410274	0.362266	0.330829	0.195079	0.281547	0.246382	0.200592	0.0477509	0.101648	0.090934	0.0577116	0.0541052	0.00467089
Bacteria; Acidobacteriota; Vicinamibacteria; Subgroup 9	tolerates NaCl concentration up to 1 %		chemoorganoheterotroph	aerobe	aerobic respiration	Huber and Overmann, 2018	0.000779636	0	0.0021008	0.00387242	0.0126342	0.00524508	0.00656513	0.0148221	0.00945805	0.0160846	0.0359872	0.031148	0.456081	0.398565	0.436119	0.217775	0.301121	0.192384	0.329626	0.387132	0.436666	0.479357	3.77628	4.37347	4.13935	1.59097	1.45728	1.61505	0.347408	0.863708	0.832749	0.398493	0.726587	0.63558	0.759254	0.812021	0.812615	0.446471	0.800612	0.405137	0.307795	0.405789	0.0224203
Bacteria; Synergistota; Synergistia; Synergistales			chemoorganotroph, wastewater digestment	anaerobe	fermentation	Nakasaki et al., 2019	0	0	0.556711	2.47577	8.07644	4.26687	0.0295431	0.0444664	1.6457	0.0100529	0.0844314	0.0891476	0	0	0	0.00588582	0	0	0	0	0	0	0	0	0	0	0	0	0	0	0	0	0	0	0.00461553	0	0	0	0	0.007393	0.00303745	0.00579699	0
Bacteria; Acidobacteriota; Subgroup 26; uncultured Acidobacteria bacterium	closely related to Thermoanaerobaculalia (Sub23)		chemoheterotroph	anaerobe	anaerobic respiration	Kielak et al., 2016; Dedysh and Yilmaz 2018	0	0	0.00420159	0.00129081	0	0	0.00328256	0.00494071	0	0.114603	0.0719743	0.0934439	0.751327	0.693953	0.729011	0.512066	0.841063	0.872315	0.840883	0.135836	0.111341	0.121151	0.232701	0.259962	0.34211	0.041205	0.0672312	0.0704282	0.0601283	0.122821	0.182259	0.181133	0.213338	0.144736	0.228469	0.218621	0.0527102	0.0334257	0.0660191	0.0524903	0.0577116	0.0637669	0.0635241
Bacteria; Actinobacteriota; Thermoleophilia; Gaiellales		Actinobacteria - Thermoleophilia - Gaiellales	heterotroph	strict aerobe, alkane degradation	aerobic respiration	Albuquerque et al., 2011	0.00196429	0.0723404	0.113443	0.0516322	0.028427	0.0445831	0.268076	0.270504	0.0914279	0.361904	0.258831	0.28785	0.160835	0.198035	0.230129	0.50618	0.449952	0.40058	0.361019	0.129044	0.114821	0.120197	0.342927	0.303653	0.361813	0.645545	0.52513	0.627451	0.661411	0.417987	0.491108	1.07955	1.29858	1.01315	0.782332	0.857133	0.510996	0.231592	0.362581	0.0414008	0.0263246	0.0425113	0.00186836
Bacteria; Proteobacteria; Gammaproteobacteria; Chromatiales	Halochromatium (0.06), Thiohalocapsa (0.11)		photoautotroph, sulfur oxidation, purple sulfur bacterium, occurs in mang.	facultative anaerobe	Sulfur-oxidation	Fernandez et al., 2016; Gros et al., 2018	0.110019	0.731915	0.825613	1.04684	1.80985	1.23784	0.41798	0.653409	0.356253	0.0482538	0.214539	0.183666	0.0218275	0.0249623	0.0257487	0.0392388	0.0951821	0.0448017	0.105391	0.00905572	0	0.00381577	0.061237	0.0458756	0.0268673	0	0	0.00320128	0	0.00594295	0.00533813	0	0.00618372	0.00629287	0.00923105	0	0	0	0.00314376	0.0051751	0.0161997	0.017391	0
Bacteria; Bacteroidota; Bacteroidia; Bacteroidales	Anaerophaga	Bacteroidetes - Bacteroidia – Bacteroidales	chemoorganotroph (carbohydrate hydrolysis) (scavenger of cyanos or den)	Facultative aerobe/ strict anaerobe	fermentation	Iino, 2015; Hania, 2017	0.0250108	0	0.506292	1.43796	1.87303	1.45289	0.0667454	0.0728755	1.13497	0	0	0	0	0.00249623	0	0.00392388	0.00865291	0.00263539	0.0179388	0	0.00173971	0.000953944	0	0	0	0.0206025	0.0181706	0.057623	0.00668092	0.00594295	0.0114389	0	0.00309186	0	0.00692329	0.00347017	0.0966353	0.174291	0.118415	0.315681	1.20789	0.939112	1.48254
Bacteria; Myxococcota; Polyangia; Polyangiales	Sandaracinus		chemoheterotroph, mesophil, cultivated from soil with plant residues	aerobe	aerobic respiration	Mohr et al., 2012	0.000779636	0.425532	0.359236	0.558919	0.653822	1.08573	0.378589	0.466897	0.570636	0.846452	1.24433	1.02896	0.322818	0.329503	0.283236	0.190308	0.23709	0.345237	0.269082	0.0679179	0.0521912	0.0634372	0.387834	0.338605	0.274046	0.304459	0.199876	0.232093	0	0.0297147	0.046518	0.00724533	0.00618372	0.00629287	0.0438475	0.0728737	0.0102492	0.0334257	0.0335335	0.106459	0.0971985	0.125601	0.00653924
Bacteria; Planctomycetota; Planctomycetes; Planctomycetales			chemoheterotroph, mesophil, but complex lifestyle depending on species	aerobe	aerobic respiration	Kallscheuer et al., 2019	0.00137197	0.00425532	0.0126048	0.0271069	0.0157928	0.0288479	0.123643	0.103755	0.0220688	0.311639	0.300354	0.326517	0.569814	0.461803	0.471524	0.298215	0.353039	0.384767	0.31393	0.543343	0.419269	0.610524	2.8169	2.35276	2.81748	2.7905	2.66381	3.2605	0.36077	0.376387	0.430101	0.246341	0.537983	0.264301	0.403859	0.288024	0.711587	0.231592	0.339527	0.210701	0.124536	0.133331	0.00653924
Bacteria; Firmicutes; Bacilli; Staphylococcales	Staphylococcus		chemoheterotroph, grows better in aerobic conditions, NaCl conc up to 10%	aerobe/facultative anaerobe	(mostly) aerobic respiration	Schleifer and Bell in Bergey´s Manual (2015)	0.00236932	0	0	0	0	0	0	0	0	0	0	0	0.00114882	0	0	0	0.0103835	0	0.00224235	0	0	0	0	0	0.00179115	0	0	0.00160064	0	0.00792393	0.00228777	0.021736	0.00309186	0.00629287	0.00692329	0.0138807	0.00292834	0	0.00104792	0	0	0	0
Bacteria; Proteobacteria; Gammaproteobacteria; Ectothiorhodospirales	Thiohalomonas		chemolithoautotroph, halotolerant	facultative anaerobe	Sulfur-oxidation	Sorokin et al., 2007	0.00277549	0	0.0588223	0.0658311	0.0979154	0.115392	0.126926	0.17169	0.201772	0.0864548	0.156406	0.108481	0.0930542	0.136461	0.128744	0.347263	0.443029	0.33733	0.437259	0.255824	0.320106	0.25995	0.208206	0.181318	0.2024	0.013735	0.00181706	0.022409	0.126937	0.16046	0.185309	0.0289813	0.0309186	0.0314644	0.0738484	0.0555228	0.0146417	0.0167128	0.0209584	0.0310506	0.0303745	0.0328496	0.192441
Bacteria; Myxococcota; Polyangia; Nannocystales			heterotroph, decaying plant material, sensitive to NaCl (<0.8%)	aerobe/facultative anaerobe	aerobic respiration	Reichenbach in Bergey´s Manual (2015)	0	0.0340426	0.0021008	0.00387242	0.0126342	0	0.14881	0.125988	0.0283742	0.386031	0.272672	0.459701	0.465271	0.490926	0.429682	0.260938	0.285546	0.424298	0.39017	0.0384868	0.0608897	0.0443584	0.0326597	0.019661	0.0304496	0.0183133	0.00908529	0.017607	0	0.00594295	0.00533813	0	0	0	0	0.00347017	0.00439252	0.00238755	0.00419169	0.0066537	0.0141748	0.023188	0.000934178
Bacteria; Dependentiae; Babeliae; Babeliales			parasite, specialized for infection of microzooplankton	parasite	parasite	Deeg et al., 2019	0.0244793	0.0425532	0.0147056	0.0283977	0.00947568	0.0236028	0.10723	0.103755	0.0283742	0.335766	0.260215	0.262073	0.333157	0.249623	0.173804	0.125564	0.185172	0.197654	0.230962	0.459578	0.344462	0.376808	4.09471	3.4079	3.30467	0.874462	0.686848	1.12205	0.354089	0.528922	0.284446	1.12303	0.689485	0.881002	0.30924	0.256793	0.414361	0.0716264	0.198057	0.0317899	0.0182247	0.0289849	0.0121443
Bacteria; Proteobacteria; Gammaproteobacteria; Steroidobacterales	Woeseia	Proteobacteria - Gammaproteobacteria - Steroidobacterales	chemoorganotroph	facultative anaerobe	denitrification	Fahrbach et al., 2008	0.00795302	0.0893617	1.27938	1.7271	1.6614	2.35504	0.699186	0.938735	1.00255	0.0643384	0.332189	0.22985	0.0448039	0.0391077	0.0354045	0.0706298	0.062301	0.0658848	0.103148	0.00226393	0	0.00429275	0	0.0174764	0.00179115	0	0	0	0.00668092	0.0316957	0.0198273	0.355021	0.228798	0.113272	0.249238	0.180449	0.0541744	0.0382007	0.0387731	0.0155253	0.00911236	0.0193233	0
Bacteria; Chloroflexi; Anaerolineae; Caldilineales	Caldilineaceae	Chloroflexi - Anaerolineae - Caldilineales	chemoorganotroph	facultative anaerobe	fermentation	Sekiguchi et al., 2003; Andersen et al., 2019	0.00601914	2.89787	1.3151	1.11784	0.366393	0.335685	3.76401	3.64872	0.539109	0.148783	0.139796	0.148221	0.0608873	0.0399398	0.0740276	0.0451246	0.0432646	0.0237185	0.0336353	0.031695	0.0139176	0.0157401	0.0122474	0.0131073	0.0107469	0.00457834	0.00363412	0.00480192	0.0133618	0.0198098	0.0228777	0	0	0.0251715	0.0369242	0.0242912	0.00878503	0	0	0.0280934	0.00911236	0.0154586	0
Bacteria; NB1-j; uncultured bacterium	Nitrification pathway, potentially bacterivorous		heterotroph, sponge associated (Stylissa Massa, gelber Kalkschwamm), Astrangia poculata	aerobe	aerobic respiration	de Voogd et al., 2015	0	0.00425532	0.0168064	0.0232345	0.0315856	0.0419606	0.0153186	0.0259387	0.0630537	0.0924865	0.0719743	0.0708885	0.190704	0.170576	0.138399	0.19227	0.309774	0.284622	0.358777	0.176586	0.210504	0.206052	0.0367422	0.0262146	0.0322407	0.155663	0.125377	0.104042	0.247194	0.772583	1.14922	0.0796986	0.170052	0.125857	0.673867	0.812021	1.02346	0.902493	1.20406	0.649106	0.606478	0.649263	0.171889
Bacteria; Actinobacteriota; Actinobacteria; Propionibacteriales	Cutibacterium		chemoorganotroph, lives in sebaceous areas, follicles, degrade Triglycerides	anaerobe		Dréno et al., 2018	0.00464717	4.49362	2.48524	1.6432	0.735944	1.03853	0.724352	0.820158	0.170245	0.289523	0.308659	0.296443	0.160835	0.34032	0.278408	0.151069	0.164405	0.260904	0.213024	0.0249032	0.0173971	0.0100164	0.0449071	0.019661	0.0179115	0.00915667	0.00908529	0.00320128	0.00668092	0	0.00533813	0.021736	0.00927558	0.0125857	0.00230776	0	0.00439252	0	0.00523961	0.0014786	0.00202497	0.00193233	0
Bacteria; Desulfobacterota; Desulfobacteria; Desulfatiglandales	Desulfatiglans		chemoorganotroph	anaerobe	sulfate-reduction	Kraiselburd et al., 2019	0.00701764	0	0.382345	0.530521	0.818067	0.765781	0.641194	0.880682	0.870141	0.0261375	0.274056	0.192258	0.0493992	0.0515889	0.0514974	0.062782	0.124602	0.105416	0.161449	0.122252	0.1183	0.112565	0.0244948	0.0174764	0.0197027	0.0846992	0.0854018	0.145658	0.0334046	0.192155	0.298173	0.0362266	0.0556535	0.0188786	0.214622	0.218621	0.0790653	0.0883392	0.154044	0.21144	0.157947	0.181639	0.123311
Bacteria; Proteobacteria; Alphaproteobacteria; Sphingomonadales	Sphingomonas (0.1), Porphyrobacter (0.02)		heterotroph	aerobe	aerobic respiration	Yabuuchi and Kosako in Bergey´s Manual (2015)	0.0499269	0.0255319	0.241592	0.373043	0.325332	0.414361	0.0864408	0.118577	0.050443	0.0221163	0.0830473	0.0827032	0.00919054	0.00582455	0.00804648	0.00588582	0.00692233	0.00263539	0.00896941	0.00905572	0.00173971	0.00238486	0	0.0109228	0.0125381	0.00228917	0	0	0	0.00198098	0.00686331	0.130416	0.210246	0.106979	0.272316	0.242912	0.25623	0.202941	0.188626	0.0118288	0.0182247	0.00579699	0.0186836
Bacteria; Firmicutes; Clostridia; Oscillospirales	Anaerotruncus		chemoorganotroph	anaerobe	fermentation	Lawson et al. in Bergey´s Manual (2015)	0.0535716	0	0.21218	0.205238	0.161087	0.0524508	0.124737	0.121047	0.148176	0.00402115	0.0304507	0.00859254	0.0114882	0.00332831	0.00804648	0.0843634	0.00519175	0.00263539	0.0179388	0.00226393	0	0.000953944	0	0	0	0.00228917	0.00181706	0	0	0	0.00076259	0	0	0	0.00692329	0.0104105	0	0	0.00628753	0	0	0	0
Bacteria; Proteobacteria; Gammaproteobacteria; Pseudomonadales	Pseudomonas (0.06), Acinetobacter (0.05), Enhydrobacter (0.04),	Proteobacteria - Gammaproteobacteria - Pseudomonadales	chemoorganotroph	facultative anaerobe	aerobic respiration	Zhu, 2016; Pengyi, 2017	0.0194934	0.00425532	0	0	0	0	0	0.00123518	0	0.00603173	0	0.00107407	0.00574409	0	0.00482789	0.00392388	0.00173058	0.0105416	0.00448471	0	0.00173971	0.00715458	0.00408247	0.019661	0.00716461	0	0.00363412	0.0080032	0.0133618	0.0713154	0.0144892	0.137661	0.0865721	0.125857	0.0161543	0.0416421	0.0204984	0.00238755	0.00104792	0	0	0	0.00467089
Bacteria; Myxococcota; Polyangia; Haliangiales	Haliangium		chemoorganotroph, halophilic, marine	aerobe	aerobic respiration	Garcia et al., 2014	0	0.119149	0.0378143	0.0180713	0.0189514	0.0183578	0.276829	0.329792	0.141871	1.31291	0.970269	0.993513	0.305586	0.405222	0.362091	0.300177	0.359961	0.482277	0.426047	0.117724	0.0626294	0.122105	0.220453	0.209717	0.170159	0.0389159	0.0472435	0.0256102	0	0.00198098	0.00457554	0	0	0	0.00230776	0	0.00292834	0	0.00209584	0.00961091	0.0060749	0.00966165	0
Bacteria; NB1-j; unidentified bacterium wb1 N15;	Nitrification pathway, potentially bacterivorous		heterotroph, sponge associated (Stylissa Massa, gelber Kalkschwamm), Astrangia poculata	aerobe	aerobic respiration	de Voogd et al., 2015; Sharp, 2017	0	0	0	0.0103264	0.00947568	0.034093	0.0131303	0.0160573	0.059901	0.00603173	0.0138412	0.00644441	0.689291	0.61241	0.569691	0.63763	0.976049	0.716827	1.30953	0.181114	0.189628	0.158355	0.106144	0.115781	0.116425	0.425785	0.394302	0.267307	0.14698	0.764659	0.892231	0.0579626	0.0680209	0.0629287	0.272316	0.284554	0.210841	0.131315	0.269316	0.0606226	0.0516367	0.0811579	0.0336304
Bacteria; SAR324 clade(Marine group B); uncultured delta proteobacterium			litho-/organo-/auto-/heterotroph, very versatile, C1 oxidation also possible	everything	everything	Sheik et al., 2014	0	0	0	0	0	0	0	0	0	0.00201058	0.00276824	0.00214814	0.0218275	0.0191378	0.0241394	0.0490485	0.0588398	0.0685202	0.0852094	0.0498064	0.0330544	0.0238486	0	0	0.00179115	0.0183133	0.0199876	0.0080032	0.0400855	0.269414	0.334015	0.144907	0.105123	0.201372	0.369242	0.523996	0.0204984	0.0214879	0.0293418	0.162646	0.226796	0.210624	0.0280253
Bacteria; Desulfobacterota; Syntrophobacteria; Syntrophobacterales		Proteobacteria - Deltaproteobacteria - Syntrophobacterales	chemoorganotroph/chemolithoautotroph	anaerobe	sulfate-reduction	Dombrowski et al., 2017	0	0	0	0	0	0	0	0	0.00315268	0	0	0	0.0367622	0.0332831	0.0241394	0.0843634	0.140177	0.10278	0.139026	0.095085	0.113081	0.16694	0.0367422	0.0109228	0.0179115	0.08241	0.0781335	0.153661	0.126937	0.540808	0.763353	0.021736	0.0618372	0.0881002	0.17539	0.291495	0.342616	0.219654	0.429648	0.680156	0.529529	0.660857	0.130785
Bacteria; Desulfobacterota; Desulfobulbia; Desulfobulbales	Desulfopila		chemoorganotroph/chemolithoautotroph, optimum NaCl = 1%	anaerobe	sulfate-reduction	Suzuki et al., 2007	0.00495866	0.00851064	0.239491	0.269778	0.30638	0.233406	0.0798757	0.0728755	0.0157634	0.00201058	0.00138412	0.00429627	0.00229764	0.00416039	0	0.00980969	0.0155752	0.0289893	0.0224235	0	0.00347941	0.00190789	0.00408247	0	0	0	0	0	0	0	0	0	0	0	0	0	0.0234267	0.0358132	0.0293418	0.312724	1.06918	0.769067	0.0140127
Bacteria; Bacteroidota; Bacteroidia; Chitinophagales	Phaeodactylibacter	Bacteroidetes - Bacteroidia - Chitinophagales	chemoorganotroph (carbohydrate hydrolysis)	aerobe/facultative anaerobe	aerobic respiration	Munoz et al., 2016; Alderkamp et al., 2006	0.160161	0.0170213	0.598727	1.42118	2.63424	2.45994	0.140056	0.221097	0.453987	0	0.00276824	0.00107407	0.00229764	0.0074887	0.0016093	0.0117716	0.0103835	0.0289893	0.00896941	0.00452786	0.0243559	0.0109704	0	0.0131073	0	0	0.0109024	0.00160064	0.0267237	0.0257528	0.0747339	0	0.00309186	0	0.0276932	0.0381719	0.00732086	0.00477509	0.00419169	0.051751	0.0435368	0.0676315	0.00373671
Bacteria; Chloroflexi; KD4-96; uncultured bacterium	closest hit: estuary surface seawater		heterotroph presumably, variable, assoc with pH 7 and Cd cont soils	everything	everything	Golebiewski et al., 2014	0.00233891	1.61702	0.409655	0.280105	0.113708	0.0708085	1.56359	1.19318	0.286894	0.842431	0.596556	0.684181	0.206787	0.304541	0.323468	0.43555	0.719922	0.645671	0.529195	0.0973489	0.076547	0.0491281	0.126556	0.14418	0.150457	0.155663	0.141731	0.110444	0.0534474	0.0277338	0.0305036	0.0507173	0.0834802	0.050343	0.0300009	0.0451123	0.109813	0.00955019	0.053444	0.0184825	0.00506242	0.00966165	0
Bacteria; Chloroflexi; Anaerolineae; Ardenticatenales			chemoheterotroph, tolerates wide range of temp and NaCl content	facultative aerobe	aerobic respiration, denitrification if anox.	Kawaichi et al., 2013	0	0.00425532	0	0.0374334	0.101074	0.0183578	0.00984769	0.00741107	0.00315268	0.0120635	0.00276824	0.00859254	0.0781196	0.0540851	0.054716	0.133412	0.214592	0.184478	0.165934	0.0384868	0.0643691	0.0410196	0.0204123	0	0	0.0434942	0.0708653	0.0128051	0.106895	0.299128	0.251655	0.043472	0.114399	0.157322	0.281547	0.298435	0.0322118	0.0382007	0.0513482	0.187043	0.18731	0.170045	0.0429722
Bacteria; Firmicutes; Bacilli; Haloplasmatales	Haloplasma		chemoorganotroph, halophil, grows best at NaCl 8 % (1.5-18%)	anaerobe	fermentation	Antunes et al., 2008	0.500184	0.119149	0.092435	0.0245253	0.00631712	0.0131127	0.1882	0.0938735	0.0126107	0.520739	0.247758	0.214814	0.350389	0.244631	0.241394	0.400235	0.472449	0.353143	0.461925	0.407507	0.287051	0.354867	1.15126	0.87382	1.28067	0.386869	0.352509	0.380952	0	0.00396197	0.00381295	0	0	0	0.00461553	0	0	0	0	0.007393	0.00202497	0	0
Bacteria; Acidobacteriota; Thermoanaerobaculia; Thermoanaerobaculales	Thermoanaerobaculaceae, Subgroup 10/23		chemoheterotroph, thermophil, like freshwater hot springs	anaerobe	anaerobic respiration	Dedysh and Yilmaz, 2018	0.00321208	0	0.302515	0.517613	0.574858	1.04639	0.0820641	0.197628	0.394086	0.0100529	0.0609013	0.0461849	0.0195299	0.0232982	0.0289673	0.0412007	0.041534	0.0421663	0.0493318	0.0701818	0.0521912	0.068207	0.0244948	0.0174764	0.0197027	0.0228917	0.0236218	0.0240096	0.0400855	0.251585	0.267669	0	0.0618372	0.0943931	0.106157	0.121456	0.0468535	0.0549136	0.0974567	0.0731907	0.0668239	0.0908195	0.000934178
Bacteria; Proteobacteria; Alphaproteobacteria; Thalassobaculales			chemoheterotroph, marine, grows at salinites between 1 and 10 %	facultative anaerobe	aerobic respiration	Zhang et al., 2008	0.0094176	0.161702	0.647045	0.490506	0.375869	0.277989	0.648853	0.742342	0.261673	0.257354	0.185472	0.255628	0.0896078	0.0906965	0.0740276	0.153031	0.176519	0.142311	0.235447	0.0384868	0.0313147	0.0381577	0.110227	0.043691	0.035823	0.0206025	0.0145365	0.0112045	0	0.0356577	0.0205899	0	0.00309186	0	0.0369242	0.058993	0.00146417	0.00238755	0.00419169	0.0377043	0.0475867	0.0405789	0.010276
Bacteria; Chloroflexi; Chloroflexia; Chloroflexales	Candidatus Chlorothrix (0.13), Roseiflexaceae (0.01)	Chloroflexi - Chloroflexia - Chloroflexales	photoheterotroph	facultative anaerobe	anoxygenic photosynthesis	Louyakis et al., 2018; Grouzdev et al., 2015	0.00405484	3.67234	0.0903342	0.123917	0.214782	0.246519	0.0109419	0.0271739	0.00630537	0	0	0	0	0.000832078	0.00321859	0	0	0	0	0	0	0	0	0	0	0	0	0	0	0	0	0	0	0	0	0	0	0	0	0	0	0	0
Bacteria; Gemmatimonadota; PAUC43f marine benthic group; uncultured bacterium			heterotroph, sponge symbiont, e.g. Ircinia campana (Hornkieselschwamm)	aerobe	aerobic respiration	Radwan et al., 2010	0.000623893	0.00425532	0.0630239	0.0619587	0.120025	0.19669	0.0579919	0.128458	0.315268	0.0180952	0.109346	0.0622959	0.303288	0.270425	0.262315	0.11183	0.167867	0.23455	0.224235	0.06339	0.0504515	0.0467432	0.0530721	0.0830129	0.0411965	0.0480725	0.0526947	0.0864346	0.120257	0.291204	0.455266	0.0362266	0.435952	0.471965	1.43774	1.3846	0.253302	0.355744	0.269316	0.178911	0.258183	0.322699	0.0214861
Bacteria; Actinobacteriota; Actinobacteria; Corynebacteriales	Corynebacterium	Actinobacteria - Actinobacteria - Corynebacteriales	heterotroph	aerobe	aerobic respiration	Yamamura, 2018; Dastager, 2014	0.00261975	0	0	0	0	0	0.00765931	0.0123518	0	0.0160846	0.00968885	0.0150369	0.282609	0.164751	0.18346	0.43555	0.375536	0.33206	0.385685	0.00226393	0	0.00190789	0.0122474	0.0043691	0.0268673	0	0	0.00640256	0.00668092	0.00990491	0.00533813	0.043472	0.00618372	0.0251715	0.00461553	0.00694035	0.00439252	0	0.00314376	0.0007393	0.00202497	0	0.00186836
Bacteria; Cyanobacteria; Cyanobacteriia; Oxyphotobacteria Incertae Sedis	Pseudanabaena NgrPSln22 (0.04)						0.00118466	0.0425532	0.0021008	0.00129081	0.00631712	0	0	0.00247036	0	0.00402115	0	0	0	0	0	0	0	0.00263539	0	0	0	0	0	0	0	0	0	0	0	0	0	0	0	0	0	0	0	0	0	0	0	0	0
Bacteria; Acidobacteriota; Vicinamibacteria; Vicinamibacterales			chemoheterotroph, mesophil, tolerate broad pH range, grow on sugars	aerobe	aerobic respiration	Dedysh and Yilmaz, 2018	0	0	0	0.00258161	0	0	0.00109419	0.00247036	0.00630537	0.132698	0.0664378	0.110629	0.905268	0.895316	0.852927	0.357073	0.669736	0.524443	0.65701	0.187906	0.219203	0.20319	0.187793	0.231562	0.225685	0.173977	0.208962	0.164866	0.126937	0.239699	0.346979	0.123171	0.337013	0.396451	0.475399	0.458063	0.338224	0.152803	0.375156	0.258016	0.169085	0.23188	0.010276
Bacteria; Firmicutes; Bacilli; Acholeplasmatales	Acholeplasma		heterotroph	aerobe/anaerobe	parasite	Lazarev et al., 2011	6.25482	0	0	0	0	0	0	0	0	0	0	0	0	0	0	0	0	0	0.00448471	0	0	0	0	0	0	0	0	0	0	0	0	0	0	0	0	0	0	0	0	0	0	0	0
Bacteria; Acidobacteriota; Subgroup 26; uncultured bacterium	closely related to Thermoanaerobaculalia (Sub23)		chemoheterotroph	anaerobe	anaerobic respiration	Kielak et al., 2016; Dedysh and Yilmaz, 2018	0	0	0	0	0	0	0.00109419	0.00617589	0	0.0080423	0.00692061	0.016111	0.0229764	0.0274586	0.0257487	0.0235433	0.0311505	0.0316247	0.0358777	0.0384868	0.0748073	0.0295723	0.0489896	0.0764593	0.0322407	0.0801209	0.101755	0.0528211	0.0467664	0.144612	0.0960864	0.0289813	0.108215	0.0629287	0.0992338	0.0832842	0.0863861	0.0286506	0.0712587	0.0569261	0.0658115	0.0695639	0.0289595
Bacteria; Firmicutes; Bacilli; Izemoplasmatales	Izimaplasma		heterotroph		parasite	Skennerton et al., 2016	5.74416	0	0	0	0	0	0	0	0.00315268	0	0	0	0	0.00249623	0	0	0	0	0.00448471	0	0.00695882	0	0.00408247	0.00218455	0.00537346	0	0	0.00160064	0	0.00594295	0	0	0	0	0	0	0	0	0	0	0	0	0.0084076
Bacteria; Firmicutes; Clostridia; Hungateiclostridiaceae			chemoheterotroph	anaerobe	fermentation	Zhang et al., 2018	0.285136	0.0297872	0.113443	0.117463	0.224258	0.068186	0.176164	0.119812	0.132413	0.45238	0.20485	0.151444	0.110287	0.084872	0.0659811	0.127526	0.105566	0.123863	0.118845	0.217337	0.1183	0.161693	0.608287	0.22064	0.363604	0.201447	0.118109	0.121649	0.00668092	0	0.00610072	0.0144907	0.0123674	0	0	0.00347017	0.0102492	0.00238755	0.0104792	0.0953698	0.0435368	0.0676315	0.0289595
Bacteria; Actinobacteriota; Actinobacteria; KIST-JJY010			heterotroph, associated with reef coral Porites lutea	aerobe	aerobic respiration	Kuang et al., 2015	0	0.00425532	0	0.00516322	0	0	0.0568978	0.055583	0.0252215	0.317671	0.296202	0.400627	0.148198	0.262937	0.305766	0.284481	0.278624	0.263539	0.197327	0.215073	0.226162	0.233716	0.963462	1.05732	0.874082	0.196868	0.221681	0.152061	0.080171	0.0614105	0.0419425	0.043472	0.021643	0.0440501	0.0161543	0.00694035	0.0131775	0.0214879	0.0115271	0.00813231	0.00809987	0.0135263	0
Bacteria; Proteobacteria; Gammaproteobacteria; SAR86 clade			chemoheterotroph, abundant in ocean surface waters	aerobe	aerobic respiration	Dupont et al., 2012	0.0361137	0	0.87183	1.26757	1.39924	1.71252	0.0372024	0.0827569	0.104039	0	0.00138412	0.00214814	0.00114882	0.00166416	0.0016093	0.00196194	0	0	0.00224235	0	0.00173971	0.000953944	0	0	0.00179115	0	0	0	0	0	0	0	0	0	0	0	0	0	0	0	0	0	0
Bacteria; Proteobacteria; Gammaproteobacteria; Gammaproteobacteria Incertae Sedis		Proteobacteria - Gammaproteobacteria - Gammaproteobacteria Incertae Sedis	heterotroph	microaerophile	aerobic respiration	Falagan et al., 2014	0.254695	0.00851064	0.821411	1.23014	0.994946	1.71514	0.0754989	0.125988	0.148176	0.00402115	0.0138412	0.0279258	0.0160835	0.0124812	0.0209208	0.00588582	0.00519175	0.0158124	0.0112118	0.00226393	0	0.00286183	0	0	0.0035823	0	0	0	0	0.0118859	0.0152518	0.0144907	0	0	0.00461553	0.0138807	0.00439252	0.00477509	0.00104792	0.0044358	0.00303745	0.00386466	0
Bacteria; Acidobacteriota; Acidobacteriae; PAUC26f			heterotroph, associated with sponge Aplysina cavernicola	aerobe	aerobic respiration	Thoms et al., 2003	0	0	0	0.00129081	0.00315856	0.00262254	0	0	0	0	0	0	0.00804173	0.0166416	0.0112651	0.0353149	0.0449952	0.0158124	0.0291506	0.0113196	0.0104382	0.0200328	0.00408247	0.00218455	0.00179115	0.0114458	0.00726823	0.00160064	0.0200428	0.0633914	0.12659	0	0.0340105	0.050343	0.103849	0.100635	0.0102492	0.0167128	0.0220064	0.1693	0.160985	0.200962	0.00467089
Bacteria; Bacteroidota; Bacteroidia; Sphingobacteriales		Bacteroidetes - Bacteroidia - Sphingobacteriales	chemoorganotroph (carbohydrate hydrolysis)	aerobe/ facultative anaerobe	aerobic respiration	Alderkamp et al., 2006	0.703211	0	0.0441167	0.0748667	0.287429	0.133749	0.017507	0.00741107	0.0346795	0	0	0	0	0	0	0.00196194	0	0	0	0.00452786	0	0.0104934	0	0	0	0	0	0	0	0	0	0	0.00309186	0	0	0	0.00732086	0.0310381	0.00104792	0.0621012	0.0982109	0.0483082	0.98836
Bacteria; Desulfobacterota; Desulfuromonadia; Bradymonadales			chemoorganotroph, grows best at pH 8.5 and NaCl 4%	aerobe/facultative anaerobe	aerobic respiration	Wang et al., 2015	0.00184011	0	0.117645	0.147152	0.581175	0.555978	0.101759	0.158103	0.368864	0.0221163	0.0235301	0.016111	0.00459527	0.00665663	0.00482789	0.0137336	0.0190364	0.0210831	0.00896941	0.0181114	0.0208765	0.0219407	0.00816493	0	0.00179115	0.00457834	0.00181706	0.0112045	0	0.0118859	0.00991367	0	0	0	0.00230776	0	0	0.00238755	0.00104792	0.0258755	0.0323995	0.0367143	0
Bacteria; Bacteroidota; Bacteroidia; Cytophagales	Algoriphagus		chemoheterotroph, grows in sea ice and cyanomats, up to NaCl 6 %	strictly aerobic	aerobic respiration	Bowman et al., 2003	0.688274	0.0297872	0.241592	0.524067	0.63487	0.718575	0.035014	0.0852273	0.17655	0.00201058	0	0.0032222	0.00919054	0.0183057	0.016093	0.0156955	0.0346117	0.0158124	0.03812	0.0181114	0.00869853	0.00476972	0	0	0	0.00228917	0.0127194	0.0144058	0	0.0316957	0.0625324	0	0.00618372	0.00629287	0.00692329	0.0173509	0.0102492	0.00477509	0.0282939	0.029572	0.033412	0.0309173	0.00373671
Bacteria; Chloroflexi; Anaerolineae; uncultured		Chloroflexi - Anaerolineae - uncultured	chemoheterotroph (carbohydrate hydrolysis/ carb fermentation)	facultative anaerobe/strict anaerobe	fermentation	Hug, 2013; Xia, 2016; Andersen, 2019	0.0234821	0.00425532	0.170164	0.535684	1.85407	0.959849	0.0623687	0.0666996	0.0630537	0.066349	0.0664378	0.094518	0.0390598	0.0449322	0.0563253	0.00588582	0.0121141	0.0184478	0.0112118	0.00452786	0	0.00381577	0	0.00218455	0.00537346	0	0	0	0	0.00198098	0.00076259	0	0.00309186	0	0.00230776	0.00347017	0	0	0	0.0066537	0.00101248	0.00772932	0.000934178
Bacteria; Desulfobacterota; Desulfarculia; Desulfarculales	Dethiosulfatarculus	Proteobacteria - Deltaproteobacteria - Desulfarculales	chemoorganotroph	Strict anaerobe	sulfate-reduction	Schneider et al., 2013	0	0	0.021008	0.0271069	0.0126342	0.0314705	0	0	0	0	0	0	0	0	0	0	0	0	0	0	0	0	0	0	0	0	0	0	0	0	0	0	0	0	0	0	0	0	0	0	0	0	0
Bacteria; Patescibacteria; Saccharimonadia; Saccharimonadales			chemoorganotroph (carb/sugar fermentation)	aerobe/facultative anaerobe	aerobic respiration	Zhu et al., 2020	0.13784	1.05106	0.283607	0.278814	0.0915982	0.167842	0.365459	0.24333	0.059901	0.193015	0.138412	0.227702	0.219424	0.193874	0.244613	0.125564	0.216323	0.305706	0.174904	0.031695	0.0278353	0.0228946	0.0122474	0.0087382	0.00537346	0.013735	0.00545118	0.00160064	0.0200428	0.00792393	0.00305036	0.115925	0.00927558	0.0188786	0.00230776	0	0.0263551	0.00477509	0.00838337	0.0014786	0.00303745	0.00772932	0.00186836
Bacteria; Actinobacteriota; Actinobacteria; PeM15			chemoorganotroph, reported in anaerobic bioreactors	anaerobe	anaerobic respiration	Garcia-Ruiz et al., 2019	1.23886	0.0680851	0.0021008	0.00129081	0	0	0.00984769	0.00247036	0	0.0160846	0.00276824	0.00214814	0.00804173	0.00416039	0.00804648	0.0235433	0.00692233	0.00527079	0.00448471	0.0158475	0.0243559	0.00524669	0	0.00655365	0.00895576	0.00228917	0	0.00480192	0	0.00198098	0.00533813	0	0	0	0	0	0.00292834	0	0.00314376	0.0022179	0.00101248	0	0
Bacteria; Planctomycetota; Pla3 lineage; uncultured bacterium	Pir4 lineage, from low-oxygen habitats		chemoorganotroph, complex lifestyle often associated with Fe-Ohs	facultative anaerobe/ microaerophylic	everything	Storesund and Ovreas, 2013; Dedysh et al., 2019	0	0	0	0.00516322	0	0	0	0.00247036	0.00630537	0	0	0	0.00459527	0.00249623	0.00482789	0.00392388	0.00519175	0	0.0179388	0.00905572	0.00521912	0.00286183	0	0.00218455	0	0.0114458	0.00908529	0	0	0.118859	0.140317	0	0.0494697	0.0314644	0.186929	0.260263	0.00146417	0	0.00104792	0.0502724	0.0637865	0.0463759	0.00186836
Bacteria; Proteobacteria; Gammaproteobacteria; Cellvibrionales	Microbulbifer		heterotroph, grows best in sea salt based media	aerobe	aerobic respiration	Gonzalez et al., 1997	0.298476	0.00851064	0.172265	0.366589	0.432723	0.624164	0.0164128	0.0259387	0.0220688	0.00402115	0.011073	0.00644441	0.00114882	0.00166416	0	0.00784775	0	0	0.00448471	0.00452786	0	0.000476972	0	0	0.00179115	0.0228917	0.0163535	0.0432173	0.00668092	0.0554675	0.0754964	0.021736	0.0185512	0.00629287	0.0346164	0.0347017	0.12299	0.0668513	0.0523961	0.0436187	0.0242996	0.0309173	0
Bacteria; Cyanobacteria; Vampirivibrionia; Gastranaerophilales			chemoorganotroph, non-photosynthetic cyanobacteria	anaerobe	fermentation	Monchamp et al., 2019	0.36815	0.212766	0.0504191	0.0335609	0.028427	0.0314705	0.106136	0.108696	0.0914279	0.0985182	0.0498284	0.0418886	0.0402086	0.0457643	0.0386231	0.0686678	0.0259587	0.0289893	0.0358777	0.0158475	0.0208765	0.0200328	0.0285773	0.019661	0.0268673	0.00457834	0	0.00480192	0.00668092	0.00990491	0.00076259	0	0	0	0	0.00347017	0	0.00238755	0.00314376	0.0044358	0	0	0.00280253
Bacteria; Bacteroidota; Rhodothermia; Rhodothermales			heterotroph, obligate marine (NaCl 2-4 %)	aerobe	aerobic respiration	Park et al., 2019	0.00265131	0.00851064	0.119745	0.564082	1.06443	0.870683	0.0196954	0.013587	0.0725117	0.00201058	0	0.00429627	0.00459527	0.00249623	0.00965577	0.00784775	0.00346117	0	0.00224235	0	0.00869853	0.00429275	0	0	0	0.00457834	0.00908529	0.00160064	0.00668092	0.0178288	0.0259281	0	0.00309186	0.00629287	0.0553863	0.0694035	0.0146417	0.00716264	0.0188626	0.0177432	0.0182247	0.0154586	0.00560507
Bacteria; Bdellovibrionota; Bdellovibrionia; Bdellovibrionales	OM27 clade		heterotroph		predatory/parasitic	faprotax	0.0467526	0.012766	0.0441167	0.052923	0.0379027	0.0708085	0.0754989	0.0395257	0.00945805	0.10455	0.0429078	0.0579997	0.0666314	0.06407	0.0514974	0.237395	0.188634	0.316247	0.244417	0.0384868	0.0243559	0.0372038	0.0244948	0.0240301	0.0214938	0.0160242	0.00726823	0.00960384	0	0	0.00076259	0	0	0	0	0	0.00439252	0.00477509	0.0115271	0.0288327	0.031387	0.0289849	0
Bacteria; Proteobacteria; Alphaproteobacteria; SAR11 clade	Clade III	Proteobacteria - Alphaproteobacteria - SAR11 clade	heterotroph	strict aerobe	aerobic respiration: C1 oxidation	Sun, 2011; Henson, 2017	2.70297	0	0	0.00129081	0	0	0	0	0	0	0.00138412	0	0	0	0	0	0	0	0	0	0	0	0	0.00218455	0	0	0	0	0	0	0	0	0	0	0	0	0	0	0	0	0	0	0
Bacteria; Firmicutes; Clostridia; Christensenellales	Christensenellaceae		chemoorganotroph, gut bacteria	anaerobe	fementation	Waters and Ley, 2019	0.0121613	0	0.0504191	0.182004	0.164245	0.173088	0.0153186	0.055583	0.290047	0.00201058	0.0262983	0.00107407	0	0.00166416	0.00321859	0.0215813	0	0	0.00224235	0	0	0.00143092	0	0	0	0.00228917	0	0	0	0	0	0	0	0	0	0	0	0.00238755	0.00523961	0.0243969	0.0141748	0.023188	0.0411038
Bacteria; Bacteroidota; Rhodothermia; Balneolales	Balneolaceae		heterotroph, halotolerant (up to 10% NaCl, pH 7.0-9.0)	facultative anaerobe	aerobic respiration	Xia et al., 2017	0.175605	0.0255319	0.0903342	0.318829	0.893872	0.639899	0.0240721	0.0160573	0.186008	0	0	0	0.00574409	0.00166416	0	0.00196194	0.00519175	0.00263539	0.00448471	0.00226393	0.00173971	0.000953944	0	0	0.0035823	0	0	0	0	0	0.00228777	0.0362266	0.0371023	0	0.0969261	0.00347017	0	0	0.00314376	0.0022179	0.00101248	0	0.00280253
Bacteria; Proteobacteria; Gammaproteobacteria; Thiotrichales	Thiotrix		chemoorganotroph, mixotroph, sulfur oxidizing	facultative anaerobe/microaerophilic	sulfur oxidation	Garrity in Bergey´s Manual (2015)	2.00466	0	0	0	0	0	0	0	0	0.00402115	0	0	0.00689291	0.00582455	0.00321859	0.00784775	0.0103835	0.0210831	0.0269082	0.0135836	0.0139176	0.00715458	0	0.00218455	0	0.00457834	0.00908529	0	0	0.0158479	0.016777	0	0.00309186	0.0188786	0.0207699	0.0104105	0	0	0	0	0	0	0
Bacteria; Deinococcota; Deinococci; Deinococcales	Truepera		chemoorganotroph, pH 7.5-9.5, NaCl up to 6%	aerobe	aerobic respiration	Albuquerque et al., 2005	0.302426	0.012766	0.153358	0.419512	0.938092	1.31651	0.00437675	0.0222332	0.141871	0	0.00415236	0.00214814	0.00114882	0.00166416	0	0.00980969	0.0121141	0.00263539	0.0112118	0	0	0.0033388	0	0	0	0	0	0	0	0.00198098	0.00610072	0	0	0	0	0.020821	0	0	0	0.0022179	0.00404994	0.00772932	0
Bacteria; Myxococcota; Myxococcia; Myxococcales	P3OB-42		heterotroph, associated with coral acropora cervicornis/-palmata	aerobe	aerobic respiration	Rosales at al., 2019	0.00249557	0.00425532	0.0273104	0.0567954	0.107391	0.0655635	0.0120361	0.00741107	0.00630537	0.0261375	0.0276824	0.0257776	0.00689291	0.010817	0.00321859	0.00784775	0.00865291	0.0105416	0.0156965	0.00452786	0.00347941	0.00810852	0	0	0	0	0.00181706	0.00160064	0	0	0.012964	0	0	0	0.00230776	0.00694035	0.00146417	0	0	0.0007393	0	0	0
Bacteria; Proteobacteria; Gammaproteobacteria; MBAE14			heterotroph, inhabits ammonia rich, oxygen and labile OM limited conditions	aerobe/microaerophil	aerobic respiration	Mori et al., 2019	0	0	0	0	0	0	0	0	0	0	0	0	0	0	0	0	0	0	0	0	0	0.00190789	0	0	0	0	0	0	0.0267237	0.0336767	0.0343166	0.00724533	0.0401942	0.0377572	0.103849	0.218621	0.00292834	0	0.00314376	0	0	0	0
Bacteria; Firmicutes; Bacilli; Lactobacillales	Streptococcus		chemoorganotroph, grows < pH 5, lactate as end product	anaerobe	fermentation	Hammes and Hertel in Bergey´s Manual (2015)	0.00489553	0.0382979	0	0	0.00315856	0	0.00109419	0.00123518	0	0	0	0	0	0.00166416	0	0	0.0190364	0	0.00224235	0	0.100903	0.00143092	0	0.00218455	0.00895576	0	0	0	0.00668092	0.0118859	0	0.0362266	0.0123674	0.00629287	0.00923105	0.00347017	0.00585669	0.00477509	0.00209584	0	0	0.00193233	0
Bacteria; Fusobacteriota; Fusobacteriia; Fusobacteriales	Propionigenium		chemoorganotroph, occurs typically in anoxic, marine sediments	anaerobe	fermentation	Schink and Pfennig in Bergey´s Manual (2015)	0.130288	0.940426	0	0.00129081	0	0.00262254	0.00109419	0.00247036	0	0	0	0	0	0	0	0.00196194	0.00173058	0.00263539	0.00672706	0.00452786	0	0	0	0	0	0	0	0	0.00668092	0.00396197	0	0.00724533	0	0	0	0.00347017	0.00146417	0	0	0.0014786	0	0	0.00186836
Bacteria; Patescibacteria; WWE3; uncultured bacterium	Katanobacteria		chemoorganotroph, chitin and hemicellulose as putative carbon substrate	anaerobe	fermentation	Solden et al., 2016, Guermazi et al., 2008	0.0140014	0	0.0609231	0.0916472	0.028427	0.104902	0.103948	0.0839921	0.0378322	0.0201058	0.00553649	0.00644441	0	0	0	0	0	0	0.00224235	0	0	0	0	0	0	0	0	0	0	0	0.00076259	0.202869	0.0494697	0.00629287	0.00692329	0.0104105	1.01321	0.0596887	0.164524	0.0554475	0.031387	0.0386466	0.00280253
Bacteria; Proteobacteria; Alphaproteobacteria; Alphaproteobacteria Incertae Sedis	Sporospirillum		chemoorganotroph, occur in the intestinals of tadpols	unknown, probably anaerobe	fermentation	Pot and Gillis in Bergey´s Manual (2015)	0.00745423	0.434043	0.0609231	0.0206529	0.00947568	0.0157352	0.017507	0.0160573	0	0	0	0.0032222	0	0	0.0016093	0.00196194	0.00173058	0.00263539	0.00448471	0.00452786	0.00347941	0	0	0.0043691	0.00179115	0	0	0	0	0	0	0	0	0	0	0	0	0	0	0	0	0	0
Bacteria; Chloroflexi; Anaerolineae; MSB-5B2			chemoorganotroph, normally abundant in anoxic Corg rich sediments	anaerobe	fermentation	Vuillemmin et al., 2016	0	0	0	0	0	0	0.00109419	0	0	0.0100529	0.00276824	0.00537034	0.0321669	0.0399398	0.0901205	0.00588582	0.00865291	0.0342601	0.0134541	0	0	0	0	0	0	0	0	0	0	0	0	0	0	0	0	0	0	0	0	0	0	0	0.00280253
Bacteria; Proteobacteria; Gammaproteobacteria; B108			heterotroph	aerobe	aerobic respiration	KJ817600/KJ604894 (accession ID closest hits in NCBI)	0	0	0	0	0	0	0	0	0	0	0	0	0	0.000832078	0.0016093	0.00196194	0.00173058	0.00527079	0.00224235	0	0	0	0	0	0	0.0228917	0	0.264106	0.380812	0.346672	0.332489	0	0.00309186	0	0	0.00347017	0	0	0	0	0	0	0
Bacteria; Verrucomicrobiota; Verrucomicrobiae; Verrucomicrobiales	Haloferula	Verrucomicrobia - Verrucomicrobiae - Verrucomicrobiales	chemoheterotroph	aerobe	aerobic respiration	Chiang et al., 2018	0.00651885	0	0.0735279	0.0697035	0.0852811	0.0498282	0.0339198	0.0370553	0.0157634	0.00402115	0.0152253	0.00751847	0.00344645	0.00332831	0.0016093	0.00196194	0.00173058	0	0.00448471	0.00226393	0	0.000476972	0	0	0	0	0	0	0	0	0	0	0.00927558	0	0	0	0	0	0	0.0170039	0.0060749	0.00966165	0
Bacteria; Proteobacteria; Gammaproteobacteria; Salinisphaerales	Salinisphaera		heterotroph	aerobe	aerobic respiration	Antunes et al., 2017	0.00124779	0	0	0	0	0	0	0	0	0	0	0	0	0	0	0	0	0	0	0	0	0	0	0	0	0	0	0	0	0	0	0	0	0	0	0	0	0	0	0	0	0	0
sulfate reduction
denitrification
aerobe (facultative + strict)
oxygenic phototroph
fermentation
chemolithotroph
anoxygenic phototroph
complex lifestyle; various metabolisms possible
parasite
[truncated: 19 more columns]

## Sheet: Table S8 Taxa RNA
Order	Genus, notes on habitat	Order_old	Trophy, notes	Air	Function 1	oxygenic phototroph	photoheterotroph	anoxygenic phototroph	strict_aer_hetero	microaerophil_facultative	all_aer_hetero	strict anaerobes	all anaerobes	SRB	Sulfur oxidation	fermenter	nitrification	denitrification	N2 fixation	DNRA	Nitrogen pathway	Reference	ALD_CC_K01_01_RNA_Bac	ALD_CC_K01_02_a_RNA_Bac	ALD_CC_K01_02_b_RNA_Bac	ALD_CC_K01_02_c_RNA_Bac	ALD_CC_K01_03_a_RNA_Bac	ALD_CC_K01_03_b_RNA_Bac	ALD_CC_K01_03_c_RNA_Bac	ALD_CC_K01_04_a_RNA_Bac	ALD_CC_K01_04_b_RNA_Bac	ALD_CC_K01_04_c_RNA_Bac	ALD_CC_K01_05_a_RNA_Bac	ALD_CC_K01_05_b_RNA_Bac	ALD_CC_K01_05_c_RNA_Bac	ALD_CC_K01_06_a_RNA_Bac	ALD_CC_K01_06_b_RNA_Bac	ALD_CC_K01_06_c_RNA_Bac	ALD_CC_K01_06_d_RNA_Bac	ALD_CC_K01_07_a_RNA_Bac	ALD_CC_K01_07_b_RNA_Bac	ALD_CC_K01_07_c_RNA_Bac	ALD_CC_K01_08_a_RNA_Bac	ALD_CC_K01_08_b_RNA_Bac	ALD_CC_K01_08_c_RNA_Bac	ALD_CC_K01_09_a_RNA_Bac	ALD_CC_K01_09_b_RNA_Bac	ALD_CC_K01_09_c_RNA_Bac	ALD_CC_K01_10_a_RNA_Bac
No blast hit																							13.7435	6.78369	5.88984	6.81556	7.67544	8.54049	5.48522	18.2265	17.0568	14.3552	10.6331	12.8763	15.4777	15.9135	13.0474	12.4062	13.0333	3.69409	2.18954	2.15936	11.0413	7.79334	10.956	0.958667	1.13993	2.21207	6.3146
Bacteria; Proteobacteria; Gammaproteobacteria; Oceanospirillales	Halomonas (8.75), Salinicola (1.0), Chromohalobacter (0.56), Marinobacterium (0.44)	Proteobacteria - Gammaproteobacteria - Oceanospirillales	heterotroph	aerobe	denitrification (possible when anaerob)																	Vreeland et al. in Bergey´s Manual (2015); Long et al., 2013	0.557491	0.0643708	0.0254531	0.0255984	0.105017	0.0438423	0.0130964	0.0179682	0	0.0459997	51.921	38.1863	29.5418	0.10189	0.133302	0.026617	0.113658	67.0389	80.7965	78.8434	6.38291	13.3977	5.68722	86.0234	87.4339	70.6154	50.2988
Bacteria; Actinobacteriota; Acidimicrobiia; Actinomarinales		Actinobacteria - Acidimicrobiia - Actinomarinales	photoheterotroph (actinorhodopsin)	facultative aerobe	aerobic respiration																	Mizuno et al., 2015	1.25775	1.47805	0.626145	0.227185	8.83984	11.6796	0.343781	12.8406	10.9573	12.8372	14.8539	16.9443	21.3442	12.5066	18.3903	16.1884	3.23328	6.63887	4.37907	4.10306	14.6851	19.5683	14.1829	2.05878	1.39834	1.58859	0.357076
Bacteria; Desulfobacterota; Desulfovibrionia; Desulfovibrionales	Desulfovibrio (5.6), Halodesulfovibrio (0.22), Desulfocurvus (0.13)			strict anaerob	sulfate-reduction																	Van der Maarel et al., 1996; Stams et al., 1985	0.341633	19.5737	20.617	16.2966	24.4966	19.2468	41.7973	0.399793	11.1333	4.67554	0	2.84826	0	1.21981	1.49695	1.29092	0.269191	0.0291562	0.0192275	0.0482379	0	0.00217813	0.0200844	0.0157159	0.0126308	0.042704	0.00375869
Bacteria; Firmicutes; Clostridia; Peptostreptococcales-Tissierellales	Fusibacter (1.92), Paramaledivibacter (1.37), Peptoclostridium (0.32), Tepidibacter (0.18)			anaerobe	Sulfate-reduction/ fermentation																	Fadhlaoui et al., 2015; Ravot et al., 1999	10.4972	12.0101	10.7157	11.3241	6.54605	5.90995	8.88702	4.39323	14.4019	11.6543	0.0811688	0.435855	0.0380467	1.05191	0.295426	0.425872	0.251245	0.41985	0.144207	0.831394	0.0596827	0.0130688	0.0535583	0.0733407	0.116309	0.119571	0.0225522
Bacteria; Proteobacteria; Gammaproteobacteria; Vibrionales	Photobacterium (1.95), Salinivibrio (1.33), Vibrio (1.20)		chemoorganoheterotroph	facultative aerobe																		Farmer in Bergey´s Manual (2015)	0.0560891	0.269862	0.127265	0.0511967	4.77919	2.70507	0.199721	3.12423	5.55238	4.27797	1.05519	1.28391	2.31061	12.1751	14.8992	17.4288	5.26867	0.440259	0.696998	0.428466	17.9834	22.6307	23.7497	0.958667	0.679961	1.26404	1.03364
Bacteria; Proteobacteria; Gammaproteobacteria; Alteromonadales	Marinobacter (2.98), Pseudoalteromonas (0.21), Halotolerant, need sodium to grow	Proteobacteria - Gammaproteobacteria - Alteromonadales	chemoorganoheterotroph, complex lifestyle, aerobic & Denitrification possible	anaerobe	anaerobic respiration																denitrification	Bowman in Bergey´s Manual (2015)	0.0118977	0.0148548	0.0356343	0.00959939	0.14555	0.105222	0.00763959	0.00224603	0.00475783	0.00985707	0	0.00675744	0.00146334	0.00430521	0.00540414	0.0053234	0.284146	0.247828	0.459057	0.516429	0.0031412	0	0	3.30033	2.30145	9.06179	6.85585
rare_taxa																							2.10249	3.13436	3.50743	3.94535	1.96768	2.40256	2.07469	1.4442	2.56447	1.50485	1.75866	2.61513	3.29251	1.58432	2.36881	1.89513	2.42721	0.778471	0.502319	0.834232	1.3193	0.890854	1.13477	0.0785793	0.148939	0.239143	3.57827
Bacteria; Proteobacteria; Alphaproteobacteria; Rhizobiales	Nesiotobacter (0.62), Labrenzia (0.5), Dichotomicrobium (0.37), Methyloceanibacter (0.33)	Proteobacteria - Alphaproteobacteria - Rhizobiales	chemoheterotroph (methylotroph)	strict aerobe	aerobic respiration																nitrogen fixation	Doronina et al., 2013	1.5161	0.423362	0.188353	0.0959939	1.2602	1.28458	0.130964	1.70249	2.05538	2.67455	0.514069	0.696016	0.661428	3.18299	2.12743	1.80197	4.18742	0.422765	0.374937	0.25254	3.82598	3.14522	5.41943	3.08031	2.62932	8.08387	1.7741
Bacteria; Nitrospirota; Thermodesulfovibrionia; uncultured		Nitrospirae - Thermodesulfovibrionia - uncultured	lithotroph	aerobe	sulfate-reduction																	Kadnikov et al., 2018	0.010198	0.0222822	0.0203625	0.0575963	1.0299	1.09167	0.18335	25.4498	7.48882	23.6635	0.351732	0.584519	0.698011	12.8137	10.2859	15.4299	1.56131	12.1552	5.75865	7.62726	17.4305	13.8986	8.66975	0.167636	0.156833	0.200709	0.342041
Bacteria; Proteobacteria; Alphaproteobacteria; Rhodobacterales	Tropicimonas (1.07), Roseivivax (0.28), Jhaorihella (0.17)		photo(hetero-)troph under anox. conditions with light, chemotroph without light (Denitrification), like freshwater	aerobe	photoheterotroph																	Shin, 2012; Imhoff et al. in Bergey´s Manual (2015)	11.5696	3.37204	2.25005	1.84948	2.21457	2.56039	0.0982233	0.0381825	0.0666096	0.095285	0.0811688	0.0270298	0.0248767	0.0904094	0.0846649	0.053234	11.0398	0.0262406	0.00961377	0.0851257	0.106801	0.111084	0.174064	0	0.00315771	0.0042704	0.109002
Bacteria; Firmicutes; Clostridia; Lachnospirales	Vallitalea (1.37), Defluviitalea (0.6), uncultured		organoheterotroph	anaerobe	fermentation																	Schouw et al., 2018	0.0186964	0.141121	0.106903	0.124792	2.32143	3.96335	27.9249	0.139254	1.23228	0.33514	0.0811688	1.44271	0.01756	0.00574028	0.00540414	0.0212936	0.00598202	0.148697	0.173048	0.110663	0	0.00653438	0.00669478	0	0.000526285	0.0298928	0.00751738
Bacteria; Chloroflexi; Anaerolineae; Anaerolineales	ADurb.Bin120	Chloroflexi - Anaerolineae - Anaerolineales	chemoheterotroph (carbohydrate hydrolysis/ carb fermentation)	facultative anaerobe/strict anaerobe	fermentation																	Hug, 2013; Xia, 2016; Andersen, 2019	0.00509901	0.0965562	0.0712686	0.134391	0.215561	0.385813	0.0611167	0.166206	0.147493	0.469854	0.378788	0.716289	0.863368	0.632866	0.853854	0.960873	1.15453	0.428596	0.346096	0.139039	4.22177	2.33495	8.28814	0.209545	0.231039	0.286117	0.296937
Bacteria; Cyanobacteria; Cyanobacteriia; Synechococcales	Synechococcus MBIC10613 (1.58), Schizothrix LEGE 07164	Cyanobacteria - Oxyphotobacteria - Synechococcales	phototroph	aerobe	oxygenic photosynthesis																	Flombaum et al., 2013	0.188663	0.1535	0.0407249	0.0351977	0.180555	0.179754	0.00218274	0.0224603	0	0.0131428	0	0	0	0	0	0	2.50946	0	0	0.00283752	0	0	0.00334739	0	0.00105257	0	0
Bacteria; Proteobacteria; Alphaproteobacteria; Tistrellales	Geminicoccaceae		photoheterotroph (AAP)	aerobe	aanyxygenic photosynthesis &heterotrophy																	Burganskaya et al., 2018	0.15467	0.131217	0.117084	0.271983	0.0902776	0.0701477	0.0163705	0.166206	0.0808831	0.0558567	1.97511	1.2062	1.67845	2.16265	1.22134	1.31754	0.225821	0.644352	0.209099	0.195789	2.57578	0.927882	1.4762	0.0576248	0.0984154	0.204979	8.70513
Bacteria; Proteobacteria; Gammaproteobacteria; Coxiellales	Coxiella		heterotroph		parasitic/predatory																	Drancourt in Bergey´s Manual (2015)	0.0118977	0	0.00509061	0	0.0036848	0.00438423	0	0.197651	0.133219	0.0755709	0.0270563	0.0270298	0.0921902	0.0229611	0.0630483	0.0452489	0.107676	0	0.0168241	0.00851257	0.197895	0.0936595	0.311307	0	0	0	0.0338282
Bacteria; Firmicutes; Bacilli; Bacillales	Pontibacillus (0.7), Bacillus (0.48), Halobacillus (0.06)	Firmicutes - Bacilli - Bacillales	heterotroph, optimal growth with 2-9 % NaCl	aerobe																	aerobic respiration	Lim et al., 2005	0.175066	0.180733	0.0509061	0.0607961	0.350056	0.363891	0.0251015	0.808571	1.07527	0.99885	0	0.165557	0.191697	11.1892	10.1418	7.84669	1.61365	0.107878	0.0648929	0.00851257	0.389508	0.378994	0.388298	0	0.00105257	0	0
Bacteria; Firmicutes; Clostridia; Clostridiales	Clostr. Sensu stricto 1/18/7 (0.71), Oceanirhabdus (0.17)	Firmicutes - Clostridia - Clostridiales	heterotroph (acetogenesis)	Strict anaerobe	fermentation																	Vavourakis, 2018	3.94833	26.8377	36.5455	31.3484	6.07808	4.79635	0.544593	0.997237	2.40746	1.86956	0.0541126	0.0304085	0.00878002	0.119111	0.0540414	0.401916	0.0942169	0.00874687	0.00480688	0.0170251	0.0031412	0	0.0468635	0	0.00210514	0.0085408	0
Bacteria; Proteobacteria; Alphaproteobacteria; Rhodospirillales	Terasakiella (0.65), Aestuariispira (0.31)		heterotroph	facultative (an)aerobe																			0	0.012379	0.0152718	0.0255984	0.0110544	0.0219212	0.00982233	0	0.00951565	0	0	0.0135149	0.0102434	0.00574028	0.0108083	0.0053234	0.0553337	0.177853	0.021631	0.553317	0	0	0	1.27298	1.76411	3.59568	3.35275
Bacteria; Actinobacteriota; Actinobacteria; Euzebyales	Euzebya		chemoorganotroph, lives in sea cucumbers		fermentation																	Kurahashi et al., 2010	17.08	4.52081	0.74832	0.182388	6.89242	6.22561	0.0960405	3.20284	2.14102	1.76113	4.65368	3.91256	5.67335	4.69124	5.50502	5.35001	1.05882	0.285731	0.158627	0.227002	0.119365	0.202566	0.100422	0	0.00315771	0.0042704	0.00375869
Bacteria; Chloroflexi; Dehalococcoidia; S085			chemoorganoheterotroph (?), CH3Cl degradation	facultative anaerobe	fermentation																	Biderre-Petit et al., 2016	0	0	0	0	0	0	0.00218274	0.0336905	0.00951565	0.0131428	0	0.121634	0.17999	0.252572	0.354872	0.31408	0.0284146	0.0816374	0.0552792	0.0737756	0.725616	0.51186	0.679521	0.0838179	0.0536811	0.166546	0.537493
Bacteria; Campilobacterota; Campylobacteria; Campylobacterales	Malaciobacter		heterotroph																			Pérez-Cataluña et al., 2018	0	0.037137	0.0152718	0.0191988	0.0073696	0	0.00327411	0	0	0	0	0	0	0	0	0	0.0164506	0	0.00240344	0.0198627	0.0031412	0	0.00669478	0	0.000526285	0.0085408	0
Bacteria; Actinobacteriota; Acidimicrobiia; Microtrichales	Ilumatobacter	Actinobacteria - Acidimicrobiia - Microtrichales	chemoorganoheterotroph	aerobe/microaerophil	aerobic respiration																	Matsumoto et al., 2009	3.43163	1.13144	0.356343	0.0895943	2.10218	2.5867	0.106954	2.18988	2.0649	1.7907	1.05519	1.75018	1.82039	2.05215	2.11302	1.91642	0.450147	0.638521	0.386954	0.238352	1.37899	1.06946	1.29879	0.068102	0.0584177	0.0597856	0.240556
Bacteria; Proteobacteria; (Beta?-)Gammaproteobacteria; Burkholderiales	Cupriavidus (0.41), GKS98 freshwater group (0.24), Ralstonia (0.08)		chemoorganotroph, degradation of aromatic compounds		fermentation																	Pérez-Pantoja et al., 2012	0.00509901	0.0198064	0.0101812	0.015999	0.0681688	0.0789162	0.00327411	0.0112302	0.0237891	0.00657138	0	0.111498	0.0746301	0.0990198	0.0738566	0.0825126	0.666996	0.221587	0	0.00567505	0.0251296	0.0435625	0.0502109	0	0.207356	0	0.048863
Bacteria; Chloroflexi; Anaerolineae; SBR1031		Chloroflexi - Anaerolineae - SBR1031	chemoheterotroph (carbohydrate hydrolysis/ carb fermentation)	facultative anaerobe/strict anaerobe	fermentation																	Hug, 2013; Xia, 2016; Andersen, 2019	0.0832838	1.31713	1.44573	1.25112	1.40575	1.93345	0.218274	1.08034	0.756494	0.666995	0.108225	0.219617	0.280961	0.236787	0.246789	0.330051	0.125623	0.0874687	0.124979	0.190114	0.436626	0.272266	0.324697	0.0576248	0.0105257	0.042704	0.669047
Bacteria; Gemmatimonadota; BD2-11 terrestrial group; uncultured bacterium		Gemmatimonadetes - BD2-11 terrestrial group - uncultured bacterium	photoheterotroph (ABC)	aerobe/ microaerophil	aerobic respiration																	Janssen, 2006; Baker et al., 2015	0.0696864	0.111411	0.188353	0.726354	0.103174	0.302512	0.266294	0.0786111	0.10943	0.0788566	0.108225	0.152042	0.150724	0.318586	0.354872	0.226244	0.0672978	0.0408187	0.0576826	0.0283752	0.141354	0.12851	0.170717	0.0209545	0.0352611	0.0597856	2.4845
Bacteria; Proteobacteria; Gammaproteobacteria; Nitrosococcales	AqS1 (0.21) ,Inmirania (0.17), FS142-36B-02 (0.11)		heterotroph, aerobic ammonia oxidizer	aerobe	aerobic respiration																AAOB	Dohra et al., 2019	0.758052	0.685796	0.346162	0.415973	0.50666	0.89	0.110228	0.92761	0.923018	0.97585	1.7316	1.80424	2.42621	1.17389	1.37265	1.13921	0.269191	0.116625	0.0576826	0.0482379	0.395791	0.389885	0.381603	0.00523862	0.0247354	0.0128112	0.691599
Bacteria; Proteobacteria; Gammaproteobacteria; Enterobacterales	Escherichia-Shigella	Proteobacteria - Gammaproteobacteria - Enterobacteriales	chemoorganotroph	facultative anaerobe	fermentation																denitrification	Leung et al., 2014	0	0.012379	0.00509061	0	0	0	0	0	0	0	0	0	0	0.0502275	0.00180138	0.0106468	4.41623	0	0	0	0.015706	0.0152469	0.0234317	0.00523862	0.00105257	0	0
Bacteria; Desulfobacterota; Desulfobacteria; Desulfobacterales	Desulfosarcinaceae (0.28), Desulfolunaceae,: Desulfobacter (0.06)	Proteobacteria - Deltaproteobacteria - Desulfobacterales	chemoorganotroph/lithohetero/litoautotroph	anaerobe	sulfate-reduction																DNRA	Foti et al., 2007; Vavourakis et al., 2018	0.020396	1.70087	2.56058	5.95802	1.28231	2.09566	2.33335	0.0291984	0.623275	0.239855	0.0541126	0.277055	0.17121	0.124851	0.0738566	0.1251	0.0628113	0.0204094	0.0144207	0.065263	0.0565415	0.0500969	0.0468635	0.00523862	0.0115783	0.0512448	0.0526217
Bacteria; Actinobacteriota; Thermoleophilia; Solirubrobacterales	Solirubrobacterales soli ??, occurs only at NaCl concentrations up to 1.5 %		heterotroph	aerobe																		Hu et al., 2019	0.00169967	0	0	0	0.027636	0.0306896	0.00436548	0.154976	0.123703	0.154427	0.297619	0.547353	0.400954	1.28869	1.61043	1.38408	0.33948	1.10794	0.658543	0.26389	3.20402	2.30881	3.86289	0.251454	0.391556	0.392877	0.161624
Bacteria; Chloroflexi; JG30-KF-CM66; uncultured bacterium		Chloroflexi - JG30-KF-CM66 - uncultured bacterium	heterotroph	facultative aerobe	aerobic respiration																		0	0	0	0	0.0073696	0.0131527	0	0.0449206	0.114188	0.147856	0.0541126	0.0405446	0.0468268	0.0387469	0.0792607	0.0692042	0.0209371	0.0962155	0.127382	0.0851257	0.395791	0.304938	0.291223	0.0366703	0.0299983	0.085408	0.0826912
Bacteria; Proteobacteria; Gammaproteobacteria; uncultured																							0.0526897	0.0767498	0.0305437	0.0639959	0.676161	0.789162	0.0349238	2.50208	1.25607	1.78084	0.0270563	0.0810893	0.174137	0.185124	0.31344	0.40724	0.0972079	0.00291562	0	0.00283752	0.0188472	0.03485	0.0669478	0	0	0	0.00375869
Bacteria; Planctomycetota; Planctomycetes; Pirellulales		Planctomycetes - Planctomycetacia - Pirellulales	heterotroph	aerobe/anaerobe	anaerobic respiration (anammox)																fermentation	Gloeckner et al., 2003; Lage et al., 2014	0.00169967	0.0693224	0.0407249	0.0767951	0.119756	0.179754	0.0141878	0.276262	0.337806	0.220141	0.378788	0.402068	0.430221	0.232481	0.16933	0.215598	0.547355	0.224503	0.0648929	0.153226	0.326684	0.12851	0.220928	0.00523862	0.00894685	0.042704	0.135313
Bacteria; Actinobacteriota; Actinobacteria; Nitriliruptorales	moderately salt tolerant, lives in soda lakes		heterotroph	aerobe	aerobic respiration																nitrile degradation (?)	Sorokin et al. , 2009	10.4479	2.84964	0.880676	0.246384	1.90504	1.84576	0.0665735	0.386317	0.37111	0.223427	0.108225	0.084468	0.177064	0.0861042	0.0558428	0.0399255	0.0254236	0.0116625	0.00480688	0	0	0.00217813	0.00334739	0	0.000526285	0	0.0263108
Bacteria; Actinobacteriota; Actinobacteria; Micrococcales	Microbacteriaceae: Cand. Aquiluna (0.22), ML602J-51 (0.09)	Actinobacteria - Actinobacteria - Micrococcales	heterotroph	aerobe	aerobic respiration																denitrification	Zhu et al., 2016	0.0900824	0.0074274	0	0.00639959	0.0405328	0.0175369	0.00218274	0.0381825	0.0190313	0.042714	0.0270563	0.060817	0.0980435	0.0272663	0.0720552	0.0212936	0.115154	0.0583124	0.0937342	0.0141876	0.0691063	0.16336	0.184107	0.0104772	0.011052	0.0042704	0.0300695
Bacteria; Proteobacteria; Alphaproteobacteria; uncultured		Proteobacteria - Alphaproteobacteria - uncultured	heterotroph	aerobe	aerobic respiration																		0.492904	0.670942	0.615964	1.15833	0.353741	0.355123	0.0447461	0.0157222	0.0428204	0.0295712	0	0.0168936	0.00731668	0.0100455	0.00720552	0.0133085	0.161515	0	0.00480688	0.0113501	0.0031412	0.00653438	0	0	0.000526285	0	0.40218
Bacteria; Actinobacteriota; Acidimicrobiia; IMCC26256		Actinobacteria - Acidimicrobiia - IMCC26256	heterotroph	aerobe	aerobic respiration																		0.035693	0.0396128	0.0203625	0	0.46797	0.565566	0.020736	2.74016	1.94119	1.34056	0.784632	0.621685	0.623381	1.33318	1.09344	1.17913	0.308074	1.15459	0.716226	0.397253	4.32857	3.21056	4.0403	0.398135	0.236828	0.251954	0.0826912
Bacteria; Cyanobacteria; Cyanobacteriia; Cyanobacteriales	Stanieria PCC-7437 (0.11), Arthrospira PCC-7345 (0.10), Cyanobacterium CLg1(0.07),Pleurocapsa PCC-7319 (0.06),		phototroph	aerobe	oxygenic photosynthesis																	Castenholz in Bergey´s Manual (2015)	13.9339	3.37699	0.402158	0.419173	6.73582	5.28739	0.198629	0.071873	0.0475783	0.0361426	0.0270563	0.0168936	0.00731668	0.0645782	0.0270207	0.0026617	6.37235	0	0.00240344	0.00567505	0	0.0108906	0.016737	0	0	0.0042704	0.0150348
Bacteria; Halanaerobiaeota; Halanaerobiia; Halanaerobiales	Halanaerobium (0.24), Halocella (0.1), Orenia (0.09)		chemoorganotroph, halophil/halotolerant, found in soda lakes	anaerobe	(sugar-) fermentation																	Roush et al., 2014	0.00339934	0.309475	0.137447	0.0991937	0.298469	0.192906	0.123325	0.00224603	0.209344	0.0591424	0	0.0101362	0.00146334	0	0.00180138	0.00798509	0.00598202	0.00291562	0.00721033	0.0198627	0.00628239	0.00217813	0.00669478	0.0157159	0.00421028	0.0256224	0
Bacteria; Proteobacteria; Alphaproteobacteria; Caulobacterales	Caulobacter		heterotroph, do not grow in media with NaCl >2%	aerobe	aerobic respiration																able to reduce nitrate	Poindexter in Bergey´s Manual (2015)	0.025495	0.012379	0.0458155	0.0511967	0.0018424	0.00438423	0.00109137	0	0.00475783	0	0	0.0270298	0.0409734	0.0100455	0.00540414	0.0053234	1.23828	0.0145781	0.00240344	0.00567505	0.0376944	0.0827688	0.0636005	0.0104772	0.00315771	0	0.0714151
Bacteria; Nitrospirota; Nitrospiria; Nitrospirales	Nitrospira	Nitrospirae - Nitrospira - Nitrospirales	litoautotroph	aerobe	denitrification																sulfate-reduction	Cleary et al., 2015	0	0	0	0	0	0	0.00436548	0.00898412	0.0142735	0	0.405844	0.814272	0.734595	0.348722	0.504386	0.322065	0.0702888	0.0670593	0.0360516	0.0198627	0.122507	0.102372	0.0435161	0.0471476	0.0389451	0.0042704	2.47322
Bacteria; Chloroflexi; Dehalococcoidia; SAR202 clade			chemoorganotroph, sponge associated (Applysina spp., marine sponge)	aerobe (?)																		Bayer et al., 2018; Schattenhofer et al., 2009	0	0	0	0	0.0036848	0	0	0.00673809	0.00475783	0	0.730519	0.638578	0.829712	1.8168	1.4339	1.16849	0.168992	0.0816374	0.0696998	0.0567505	0.285849	0.226525	0.217581	0.068102	0.0373663	0.0256224	0.939673
Bacteria; DTB120; uncultured bacterium;			chemoorganotroph, acetate as electron donor	anaerobe (?)	fermentation																	Nepomnyashaya et al., 2010; Makita, 2016	0	0	0	0	0	0	0	0	0	0	0.0270563	0.0337872	0.0512168	0.169338	0.244988	0.154378	0.0314056	0.0116625	0.021631	0.0255377	0.119365	0.100194	0.0736426	0.0576248	0.0399977	0.136653	1.13137
Bacteria; Bacteroidota; Bacteroidia; Flavobacteriales	Robiginitalea (0.1), Cryomorphaceae (0.1)	Bacteroidetes - Bacteroidia - Flavobacteriales	chemoorganotroph (carbohydrate hydrolysis)	aerobe/ facultative anaerobe	aerobic respiration																	Alderkamp, 2006	0.00169967	0.0396128	0.0305437	0.0255984	0.0018424	0.00876847	0.00327411	0	0	0	0	0	0.00146334	0.00143507	0	0.0053234	1.35493	0.00291562	0.00240344	0.00283752	0	0.00217813	0.00334739	0	0	0	1.24789
Bacteria; Proteobacteria; Alphaproteobacteria; Kiloniellales	Kiloniellaceae		heterotroph, mesophil, antifungal, marine, opt growth at 3% NaCl	aerobe	aerobic respiration																	Wiese et al., 2019	0.015297	0.0643708	0.137447	0.819148	0.208191	0.254286	0.0512944	0.184174	0.542392	0.489568	0.0541126	0.138528	0.103897	0.153553	0.198152	0.186319	0.0658023	0.0553968	0.0192275	0.0567505	0.480603	0.777591	0.736426	0.0104772	0.0178937	0.042704	0.883293
Bacteria; Spirochaetota; Spirochaetia; Spirochaetales	Sediminispirochaeta (0.15), Spirochaeta 2 (0.05), Salinispira (0.03)	Spirochaetes - Spirochaetia - Spirochaetales	chemoorganoheterotroph	Strict anaerobe/ facultative anaerobe	sulfate-reduction																	Dubinina et al., 2011	0.00849834	0.393652	1.15048	2.62063	0.0792232	0.11399	4.51827	0	0.0142735	0.00657138	0.135281	0.388553	0.196087	0.0703184	0.113487	0.0692042	0.167497	0.0204094	0.00240344	0.0113501	0.015706	0.00435625	0.0100422	0	0.00578914	0	0.0112761
Bacteria; Proteobacteria; Alphaproteobacteria; Defluviicoccales			chemoorganotroph (phosphate accumulators)	aerobe/anaerobe	anaerobic respiration																	McIlroy et al., 2009	0.0322937	0.037137	0.0152718	0.031998	0.0626416	0.056995	0.020736	0.0247063	0.0333048	0.0624281	0.0541126	0.0371659	0.0439001	0.0631431	0.0612469	0.0505723	0.0164506	0.0204094	0.00240344	0.0141876	0.0251296	0.0152469	0.0234317	0.0104772	0.00263143	0.0256224	0.270626
Bacteria; Entotheonellaeota; Entotheonellia; Entotheonellales	Candidatus Entotheonella		heterotroph, sponge associated (jaspis splendens, marine sponge)	aerobe (?)	aerobic respiration																	de Voogd et al., 2017	0	0.0024758	0	0	0.0239512	0.0438423	0	0.628888	0.413931	0.476425	1.4881	1.40555	1.56723	3.27483	1.35644	1.13655	0.194416	0.227419	0.112962	0.104988	1.01461	0.40731	0.649394	0.0995338	0.0778902	0.0256224	0.620184
Bacteria; Acidobacteriota; Vicinamibacteria; Subgroup 9	tolerates NaCl concentration up to 1 %		chemoorganoheterotroph	aerobe	aerobic respiration																	Huber and Overmann, 2018	0	0	0	0	0	0	0.00218274	0	0	0.00985707	0	0.0168936	0.01317	0.020091	0.0090069	0.0133085	0.00299101	0.00583124	0.00240344	0.00567505	0.13193	0.0936595	0.0803374	0	0.00315771	0.0170816	0.0789325
Bacteria; Synergistota; Synergistia; Synergistales			chemoorganotroph, wastewater digestment	anaerobe	fermentation																	Nakasaki et al., 2019	0	0.111411	0.295256	0.687956	0.0147392	0.0219212	0.244467	0	0	0	0	0.0168936	0	0.00430521	0	0	0.00448652	0	0	0	0	0	0	0	0	0	0
Bacteria; Acidobacteriota; Subgroup 26; uncultured Acidobacteria bacterium	nahe verwandt mit Thermoanaerobaculalia (Sub23)		chemoheterotroph	anaerobe	anaerobic respiration																	Kielak et al., 2016; Dedysh and Yilmaz 2018	0.00509901	0	0.00509061	0	0.036848	0.0306896	0.00109137	0.354873	0.180797	0.305569	1.40693	1.75018	2.8418	0.845256	0.916902	0.942241	0.113658	0.0553968	0.0288413	0.0227002	0.128789	0.152469	0.117159	0.0157159	0.01842	0.0085408	0.14283
Bacteria; Actinobacteriota; Thermoleophilia; Gaiellales		Actinobacteria - Thermoleophilia - Gaiellales	heterotroph	strict aerobe, alkane degradation	aerobic respiration																	Albuquerque et al., 2011	0.0849834	0.037137	0.0152718	0.0031998	0.228458	0.271823	0.0283756	0.334658	0.299743	0.282569	0.0811688	0.165557	0.112677	0.607035	0.315241	0.401916	0.0628113	0.218672	0.0648929	0.0255377	0.417779	0.222169	0.78329	0.0471476	0.0999942	0.0768672	0.157865
Bacteria; Proteobacteria; Gammaproteobacteria; Chromatiales	Halochromatium (0.06), Thiohalocapsa (0.11)		photoautotroph, sulfur oxidation, purple sulfur bacterium, occurs in mang.	facultative anaerobe	Sulfur-oxidation																	Fernandez et al., 2016; Gros et al., 2018	0.846435	0.661038	1.65954	2.96941	0.285572	0.644482	0.114594	0.0291984	0.0428204	0.0722852	0.0270563	0.145285	0.24584	0.149247	0.228775	0.133085	0.0672978	0.00291562	0.00721033	0.0170251	0.543427	0.180785	0.354824	0	0	0	0
Bacteria; Bacteroidota; Bacteroidia; Bacteroidales	Anaerophaga	Bacteroidetes - Bacteroidia – Bacteroidales	chemoorganotroph (carbohydrate hydrolysis) (scavenger of cyanos or den)	Facultative aerobe/ strict anaerobe	fermentation																denitrification	Iino, 2015; Hania, 2017	0.00509901	0.510015	0.509061	0.339178	0.00921201	0.0526108	0.215	0	0	0	0	0.0439234	0.00146334	0.00430521	0	0	0.0254236	0	0.00240344	0.00283752	0	0.00217813	0.00334739	0	0.00157886	0.0085408	0
Bacteria; Myxococcota; Polyangia; Polyangiales	Sandaracinus		chemoheterotroph, mesophil, cultivated from soil with plant residues	aerobe	aerobic respiration																	Mohr et al., 2012	0.0475907	0.222822	0.188353	0.31358	0.580356	0.723399	0.292487	2.52229	3.95375	2.35255	0.0541126	0.307464	0.225354	0.249702	0.16933	0.191642	0.116649	0.0204094	0.00961377	0.00283752	0.150777	0.0893032	0.194149	0	0.00736799	0.0042704	0.0300695
Bacteria; Planctomycetota; Planctomycetes; Planctomycetales			chemoheterotroph, mesophil, but complex lifestyle depending on species	aerobe	aerobic respiration																	Kallscheuer et al., 2019	0	0.0024758	0	0	0.0350056	0.0219212	0.00109137	0.071873	0.0903987	0.0492854	0.0270563	0.0405446	0.0731668	0.0545327	0.0288221	0.0425872	0.00598202	0.142865	0.0456654	0.0340503	1.45437	0.692644	0.920533	0.141443	0.051576	0.0982192	0.0676565
Bacteria; Firmicutes; Bacilli; Staphylococcales	Staphylococcus		chemoheterotroph, grows better in aerobic conditions, NaCl conc up to 10%	aerobe/facultative anaerobe	(mostly) aerobic respiration																	Schleifer and Bell in Bergey´s Manual (2015)	0	0.0024758	0	0	0	0	0	0	0.0142735	0	0	0.00675744	0.00439001	0.0100455	0.0126097	0	0.0104685	0.00583124	0	0.00283752	0.047118	0.0261375	0.0200844	0.00523862	0.003684	0	0
Bacteria; Proteobacteria; Gammaproteobacteria; Ectothiorhodospirales	Thiohalomonas		chemolithoautotroph, halotolerant	facultative anaerobe	Sulfur-oxidation																denitrification	Sorokin et al., 2007	0	0.0717982	0.122175	0.207987	0.243197	0.447192	0.223731	0.11904	0.0903987	0.0689995	0.108225	0.13177	0.174137	0.766328	0.830436	0.585574	0.185443	0.0204094	0.021631	0.0539129	0.386367	0.257019	0.358171	0	0	0	0.0263108
Bacteria; Myxococcota; Polyangia; Nannocystales			heterotroph, decaying plant material, sensitive to NaCl (<0.8%)	aerobe/facultative anaerobe	aerobic respiration																	Reichenbach in Bergey´s Manual (2015)	0.185264	0.0173306	0	0.00959939	1.02253	1.30212	0.0960405	6.509	2.21239	3.09184	0.4329	0.689259	0.715571	1.02895	0.661106	0.542986	0.0523427	0.00874687	0.0120172	0.0113501	0.0188472	0.0304938	0	0	0.00210514	0	0
Bacteria; Dependentiae; Babeliae; Babeliales			parasite, specialized for infection of microzooplankton	parasite	parasite																	Deeg et al., 2019	0	0.0024758	0.00509061	0	0	0	0	0.0381825	0.028547	0.00985707	0.0811688	0.145285	0.0585334	0.0172208	0.0216166	0.0212936	0.0269191	0.00291562	0.0120172	0.00283752	0.119365	0.0697001	0.0435161	0.00523862	0.000526285	0	0.00751738
Bacteria; Proteobacteria; Gammaproteobacteria; Steroidobacterales	Woeseia	Proteobacteria - Gammaproteobacteria - Steroidobacterales	chemoorganotroph	facultative anaerobe	denitrification																	Fahrbach et al., 2008	0.0118977	0.569434	1.03849	0.924741	0.32242	0.355123	0.121142	0.00224603	0	0.0262855	0.0270563	0.0405446	0.01317	0.00861042	0.014411	0.0479106	0.110667	0.0204094	0.0144207	0.0113501	0	0.00217813	0.00334739	0	0	0	0.0150348
Bacteria; Chloroflexi; Anaerolineae; Caldilineales	Caldilineaceae	Chloroflexi - Anaerolineae - Caldilineales	chemoorganotroph	facultative anaerobe	fermentation																DNRA (genome)	Sekiguchi et al., 2003; Andersen et al., 2019	0.00679867	0.0198064	0	0.0031998	0.0294784	0.0263054	0.00109137	0.0134762	0.0190313	0.0197141	0.0811688	0.0506808	0.0980435	0.040182	0.0720552	0.0771892	0.0388832	0.0174937	0.0120172	0.0198627	0.0345532	0.0500969	0.0468635	0.00523862	0.003684	0.0042704	0
Bacteria; NB1-j; uncultured bacterium			heterotroph, sponge associated (Stylissa Massa, gelber Kalkschwamm)	aerobe (?)	aerobic respiration																AAOB/Annamox?	de Voogd et al., 2015	0	0.0396128	0.091631	0.0479969	0.0958049	0.153448	0.0785786	0.0561508	0.180797	0.118285	0.0541126	0.108119	0.169747	0.0760587	0.0954731	0.0904977	0.0299101	0.0553968	0.0360516	0.0425629	0.0628239	0.0653438	0.0636005	0	0.00684171	0.0128112	0.206728
Bacteria; Actinobacteriota; Actinobacteria; Propionibacteriales	Cutibacterium		chemoorganotroph, lives in sebaceous areas, follicles, degrade Triglycerides	anaerobe																		Dréno et al., 2018	1.24756	0.289668	0.066178	0.0351977	0.160289	0.131527	0.00327411	0.0224603	0.0237891	0.0229998	0	0.00675744	0.00878002	0.0129156	0.0108083	0	0.00598202	0	0.0120172	0.00283752	0	0.03485	0.0301265	0	0	0	0
Bacteria; Desulfobacterota; Desulfobacteria; Desulfatiglandales	Desulfatiglans		chemoorganotroph	anaerobe	sulfate-reduction																	Kraiselburd et al., 2019	0	0.492684	0.783954	1.6031	0.615362	0.837389	0.798882	0.0314444	0.161766	0.124856	0	0.0473021	0.0468268	0.0172208	0.037829	0.0452489	0.0164506	0.0349875	0.00721033	0.0312128	0.031412	0.0261375	0.0133896	0.00523862	0.0142097	0.042704	0.0225522
Bacteria; Proteobacteria; Alphaproteobacteria; Sphingomonadales	Sphingomonas (0.1), Porphyrobacter (0.02)		heterotroph	aerobe	aerobic respiration																	Yabuuchi and Kosako in Bergey´s Manual (2015)	0.040792	0.0148548	0.0254531	0.031998	0.0073696	0.0306896	0.0185533	0.00673809	0.0475783	0.00985707	0	0.00675744	0.00146334	0.00430521	0.00540414	0	3.65502	0.0116625	0	0	0.00942359	0.03485	0.0368213	0	0.00526285	0	0
Bacteria; Firmicutes; Clostridia; Oscillospirales	Anaerotruncus		chemoorganotroph	anaerobe	fermentation																	Lawson et al. in Bergey´s Manual (2015)	0	0.648659	0.463246	0.188788	0.773808	0.850541	0.35033	0.00449206	0.442478	0.0624281	0	0.0337872	0	0	0.00360276	0.00798509	0	0	0	0	0	0	0	0	0	0	0
Bacteria; Proteobacteria; Gammaproteobacteria; Pseudomonadales	Pseudomonas (0.06), Acinetobacter (0.05), Enhydrobacter (0.04),	Proteobacteria - Gammaproteobacteria - Pseudomonadales	chemoorganotroph	facultative anaerobe	aerobic respiration																denitrification	Zhu, 2016; Pengyi, 2017	0	0.0148548	0	0	0	0	0.00218274	0	0	0.00985707	0	0.0135149	0.0336567	0.0301365	0.0414317	0.0133085	0.0867393	0.00291562	0.00240344	0	0.0753887	0.0435625	0.0903796	0	0.00210514	0	0
Bacteria; Myxococcota; Polyangia; Haliangiales	Haliangium		chemoorganotroph, halophilic, marine	aerobe	aerobic respiration																	Garcia et al., 2014	0.0815841	0.0519918	0.0101812	0.0607961	1.23072	1.34158	0.11132	2.82326	1.69379	1.39642	0.0270563	0.0810893	0.0921902	0.176514	0.102679	0.0745275	0.0284146	0.00583124	0.0264379	0.00851257	0.109942	0.156825	0.127201	0.0104772	0.00473657	0.0042704	0.00751738
Bacteria; NB1-j; unidentified bacterium wb1 N15;			heterotroph, sponge associated (Stylissa Massa, gelber Kalkschwamm)	aerobe (?)	aerobic respiration																AAOB/Annamox?	de Voogd et al., 2015; Sharp, 2017	0	0	0.0101812	0.0127992	0.0221088	0.0350739	0.0436548	0.0449206	0.0999144	0.14457	0.378788	0.293949	0.288277	0.261183	0.333255	0.354006	0.0508472	0.0262406	0.00240344	0.0227002	0.119365	0.200388	0.184107	0.0104772	0.0215777	0.0298928	0.206728
Bacteria; SAR324 clade(Marine group B); uncultured delta proteobacterium			litho-/organo-/auto-/heterotroph, very versatile, C1 oxidation also possible	everything	everything																	Sheik et al., 2014	0	0	0	0	0	0	0.00109137	0.00224603	0	0	0.162338	0.179072	0.242914	0.152117	0.20896	0.191642	0.0523427	0.0116625	0.00721033	0.00851257	0.0439768	0.017425	0.0401687	0	0.00421028	0	0.330765
Bacteria; Desulfobacterota; Syntrophobacteria; Syntrophobacterales		Proteobacteria - Deltaproteobacteria - Syntrophobacterales	chemoorganotroph/chemolithoautotroph	anaerobe	sulfate-reduction																	Dombrowski et al., 2017	0	0	0	0	0	0	0	0	0.0237891	0.0131428	0.0270563	0.0709531	0.0965802	0.0918445	0.113487	0.1251	0.0209371	0.746399	0.398971	0.527779	0.207319	0.1394	0.261097	0.0471476	0.0826268	0.354443	0.157865
Bacteria; Desulfobacterota; Desulfobulbia; Desulfobulbales	Desulfopila		chemoorganotroph/chemolithoautotroph, optimum NaCl = 1%	anaerobe	sulfate-reduction																	Suzuki et al., 2007	0.00339934	0.0569434	0.066178	0.031998	0.027636	0	0	0	0	0.00328569	0.0270563	0	0	0.00287014	0	0	0	0.00583124	0.00721033	0.00567505	0	0	0	0	0.00105257	0	0
Bacteria; Bacteroidota; Bacteroidia; Chitinophagales	Phaeodactylibacter	Bacteroidetes - Bacteroidia - Chitinophagales	chemoorganotroph (carbohydrate hydrolysis)	aerobe/facultative anaerobe	aerobic respiration																	Munoz et al., 2016; Alderkamp et al., 2006	0.0237954	0.230249	0.325799	0.604761	0.0257936	0.0438423	0.0240101	0.00449206	0.00951565	0.00328569	0	0	0.00585334	0.00861042	0.00720552	0.0053234	2.87735	0	0	0.00567505	0	0	0.016737	0	0	0	0.00751738
Bacteria; Chloroflexi; KD4-96; uncultured bacterium			heterotroph presumably, variable, assoc with pH 7 and Cd cont soils	everything	everything																	Golebiewski et al., 2014	0.105379	0.0222822	0	0	0.180555	0.157832	0.0109137	0.188667	0.147493	0.262855	0.0811688	0.0506808	0.0541434	0.192299	0.16933	0.138408	0.0598202	0.0670593	0.0480688	0.0170251	0.307837	0.189497	0.197496	0.0209545	0.03684	0.0085408	0
Bacteria; Chloroflexi; Anaerolineae; Ardenticatenales			chemoheterotroph, tolerates wide range of temp and NaCl content	facultative aerobe	aerobic respiration, denitrification if anox.																denitrification	Kawaichi et al., 2013	0.00679867	0.0222822	0.0509061	0.031998	0.0165816	0.0306896	0.00218274	0.0359365	0.0428204	0.0131428	0.162338	0.209481	0.2195	0.180819	0.235981	0.186319	0.0329011	0.0145781	0.00961377	0.00851257	0.100518	0.0784126	0.107117	0.0157159	0.00631542	0.0128112	0.154106
Bacteria; Firmicutes; Bacilli; Haloplasmatales	Haloplasma		chemoorganotroph, halophil, grows best at NaCl 8 % (1.5-18%)	anaerobe	fermentation																denitrification	Antunes et al., 2008	0.030594	0.0222822	0	0	0.036848	0.0394581	0	0.0179682	0.00951565	0	0	0.00675744	0.00292667	0.00287014	0	0.00798509	0.00149551	0	0	0	0	0	0	0	0	0	0
Bacteria; Acidobacteriota; Thermoanaerobaculia; Thermoanaerobaculales	Thermoanaerobaculaceae, Subgroup 10/23		chemoheterotroph, thermophil, like freshwater hot springs	anaerobe	anaerobic respiration																	Dedysh and Yilmaz, 2018	0	0.190637	0.152718	0.108793	0.0718536	0.157832	0.0512944	0.00449206	0.0475783	0.0164285	0	0.0304085	0.02195	0.0315715	0.0342262	0.0319404	0.00897304	0.00583124	0	0.00283752	0.0879535	0.124153	0.15398	0.0104772	0.00421028	0.0042704	0.447284
Bacteria; Proteobacteria; Alphaproteobacteria; Thalassobaculales			chemoheterotroph, marine, grows at salinites between 1 and 10 %	facultative anaerobe	aerobic respiration																	Zhang et al., 2008	0.195462	0.510015	0.41743	0.358377	0.806972	1.00837	0.178985	1.0197	0.732705	0.611138	0	0.0439234	0.0863368	0.060273	0.0342262	0.053234	0.142073	0.00583124	0.00240344	0.00283752	0.0251296	0.00217813	0	0	0	0.0042704	0.0526217
Bacteria; Chloroflexi; Chloroflexia; Chloroflexales	Candidatus Chlorothrix (0.13), Roseiflexaceae (0.01)	Chloroflexi - Chloroflexia - Chloroflexales	photoheterotroph	facultative anaerobe	anoxygenic photosynthesis																	Louyakis et al., 2018; Grouzdev et al., 2015	2.24356	0.155975	0.066178	0.121592	0.0055272	0.0131527	0	0.00673809	0	0	0	0	0.00146334	0.00143507	0	0	1.22931	0	0	0	0	0	0	0	0	0	0
Bacteria; Gemmatimonadota; PAUC43f marine benthic group; uncultured bacterium			heterotroph, sponge symbiont, e.g. Ircinia campana (Hornkieselschwamm)	aerobe	aerobic respiration																	Radwan et al., 2010	0	0.012379	0.0152718	0.0127992	0.073696	0.109606	0.0873096	0.0224603	0.133219	0.085428	0	0.023651	0.0321934	0.0172208	0.0432331	0.0053234	0	0.0145781	0.00240344	0.00851257	0.00942359	0.0108906	0.016737	0.00523862	0.00315771	0.0170816	0.0826912
Bacteria; Actinobacteriota; Actinobacteria; Corynebacteriales	Corynebacterium	Actinobacteria - Actinobacteria - Corynebacteriales	heterotroph	aerobe	aerobic respiration																	Yamamura, 2018; Dastager, 2014	0.00339934	0.0024758	0	0	0	0	0	0.00673809	0.00475783	0.00328569	0.297619	0.172315	0.169747	0.193734	0.396304	0.29811	0.0792618	0.0145781	0.00240344	0	0.031412	0.0283157	0.0502109	0.00523862	0.00263143	0	0
Bacteria; Cyanobacteria; Cyanobacteriia; Oxyphotobacteria Incertae Sedis	Pseudanabaena NgrPSln22 (0.04)																						0.0237954	0	0	0.0031998	0.0036848	0.00876847	0	0	0	0	0	0	0	0	0	0	19.1514	0	0	0	0	0	0	0	0	0	0
Bacteria; Acidobacteriota; Vicinamibacteria; Vicinamibacterales			chemoheterotroph, mesophil, tolerate broad pH range, grow on sugars	aerobe	aerobic respiration																	Dedysh and Yilmaz, 2018	0	0	0	0	0	0	0	0.00224603	0.0190313	0	0.0541126	0.0506808	0.0673135	0.0487924	0.0720552	0.0505723	0.00747753	0.00291562	0.00961377	0.00567505	0.015706	0.0304938	0.0200844	0	0.00263143	0.0042704	0.0187935
Bacteria; Firmicutes; Bacilli; Acholeplasmatales	Acholeplasma		heterotroph	aerobe/anaerobe	parasite																	Lazarev et al., 2011	0	0	0	0	0	0	0	0	0	0	0	0	0	0	0	0	0.00897304	0	0	0	0	0	0	0	0	0	0
Bacteria; Acidobacteriota; Subgroup 26; uncultured bacterium	nahe verwandt mit Thermoanaerobaculalia (Sub23)		chemoheterotroph	anaerobe	anaerobic respiration																	Kielak et al., 2016; Dedysh and Yilmaz, 2018	0	0	0	0	0.0165816	0.0219212	0	0.0202143	0	0.0262855	0.0270563	0.398689	0.485828	0.235352	0.367481	0.186319	0.0358921	0.00874687	0.0144207	0.00283752	0.15706	0.324541	0.394992	0.0366703	0.0789428	0.0811376	0.169141
Bacteria; Firmicutes; Bacilli; Izemoplasmatales	Izimaplasma		heterotroph		parasite																	Skennerton et al., 2016	0.00339934	0	0	0	0.0018424	0	0	0	0	0	0	0	0.00146334	0	0	0	0.00598202	0	0.00240344	0	0	0	0	0	0	0	0.00375869
Bacteria; Firmicutes; Clostridia; Hungateiclostridiaceae			chemoheterotroph	anaerobe	fermentation																	Zhang et al., 2018	0.0424917	0.141121	0.188353	0.195188	0.2303	0.267438	0.204086	0.0291984	0.118946	0.0164285	0.0270563	0.0337872	0.0439001	0.0129156	0.0180138	0.0292787	0	0.00291562	0.00480688	0.00283752	0.00942359	0.0196031	0.00334739	0.00523862	0.000526285	0	0
Bacteria; Actinobacteriota; Actinobacteria; KIST-JJY010			heterotroph, associated with reef coral Porites lutea	aerobe	aerobic respiration																	Kuang et al., 2015	0.00509901	0	0	0	0.0479024	0.0350739	0.00218274	0.258293	0.247407	0.302284	0.162338	0.307464	0.169747	0.193734	0.217967	0.188981	0.0373877	0.276984	0.132189	0.122014	0.876394	0.544532	0.800027	0.0157159	0.0521022	0.0597856	0.0112761
Bacteria; Proteobacteria; Gammaproteobacteria; SAR86 clade			chemoheterotroph, abundant in ocean surface waters	aerobe	aerobic respiration																	Dupont et al., 2012	0.00679867	0.363942	0.712686	0.460771	0.0055272	0.0263054	0	0	0	0	0	0	0.00292667	0	0	0	0.182452	0	0	0	0	0	0	0	0	0	0
Bacteria; Proteobacteria; Gammaproteobacteria; Gammaproteobacteria Incertae Sedis		Proteobacteria - Gammaproteobacteria - Gammaproteobacteria Incertae Sedis	heterotroph	microaerophile	aerobic respiration																	Falagan et al., 2014	0.00509901	0.118838	0.106903	0.124792	0.00921201	0.0131527	0.00327411	0.00449206	0	0	0	0.00337872	0	0.00143507	0.00360276	0	0.390327	0	0	0	0	0	0	0	0	0	0.00375869
Bacteria; Acidobacteriota; Acidobacteriae; PAUC26f			heterotroph, associated with sponge Aplysina cavernicola	aerobe (?)	aerobic respiration																	Thoms et al., 2003	0	0.0074274	0.0152718	0.0607961	0	0	0.00109137	0.00673809	0	0.00985707	0	0.0506808	0.0599968	0.0717535	0.0666511	0.0452489	0.0134596	0.0320718	0.00721033	0	0.0282708	0.0152469	0.0267791	0.0104772	0.00473657	0.0042704	0.57508
Bacteria; Bacteroidota; Bacteroidia; Sphingobacteriales		Bacteroidetes - Bacteroidia - Sphingobacteriales	chemoorganotroph (carbohydrate hydrolysis)	aerobe/ facultative anaerobe	aerobic respiration																	Alderkamp et al., 2006	0	0.0321854	0.0610874	0.105593	0.0018424	0.00876847	0.0185533	0	0	0	0	0.00337872	0	0	0	0	0.0104685	0	0	0.00283752	0	0	0	0	0	0.0042704	0
Bacteria; Desulfobacterota; Desulfuromonadia; Bradymonadales			chemoorganotroph, grows best at pH 8.5 and NaCl 4%	aerobe/facultative anaerobe	aerobic respiration																	Wang et al., 2015	0.00169967	0.175782	0.229078	0.601562	0.315051	0.548029	0.17571	0.0134762	0.00951565	0.0164285	0	0.0337872	0.01317	0.00717535	0.0234179	0.00798509	0.00747753	0.00874687	0.0192275	0.00283752	0.00942359	0.0108906	0.016737	0	0.00315771	0.0042704	0.0225522
Bacteria; Bacteroidota; Bacteroidia; Cytophagales	Algoriphagus		chemoheterotroph, grows in sea ice and cyanomats, up to NaCl 6 %	strictly aerobic	aerobic respiration																	Bowman et al., 2003	0.00339934	0.0099032	0.00509061	0.0543965	0.00921201	0	0.00218274	0	0	0	0	0.0168936	0.0190234	0.00574028	0.0108083	0.0026617	3.5952	0	0	0.00567505	0	0	0	0	0.000526285	0	0.00375869
Bacteria; Chloroflexi; Anaerolineae; uncultured		Chloroflexi - Anaerolineae - uncultured	chemoheterotroph (carbohydrate hydrolysis/ carb fermentation)	facultative anaerobe/strict anaerobe	fermentation																	Hug, 2013; Xia, 2016; Andersen, 2019	0.00169967	0.173306	0.636327	0.799949	0.158446	0.210443	0.230279	0.0202143	0.0523361	0.0492854	0	0.023651	0.00878002	0.00861042	0.00720552	0.0159702	0.0478562	0	0	0	0	0	0	0	0	0	0
Bacteria; Desulfobacterota; Desulfarculia; Desulfarculales	Dethiosulfatarculus	Proteobacteria - Deltaproteobacteria - Desulfarculales	chemoorganotroph	Strict anaerobe	sulfate-reduction																	Schneider et al., 2013	0	1.21809	0.682142	0.47357	0	0	0	0	0	0	0	0	0	0.0100455	0.00720552	0	0	0	0	0	0	0	0	0	0	0	0
Bacteria; Patescibacteria; Saccharimonadia; Saccharimonadales			chemoorganotroph (carb/sugar fermentation)	aerobe/facultative anaerobe	aerobic respiration																	Zhu et al., 2020	0.00509901	0.0074274	0	0	0.0018424	0	0	0	0	0	0	0.00675744	0.00292667	0	0.00180138	0	0.00149551	0	0	0	0.0031412	0	0	0	0	0	0
Bacteria; Actinobacteriota; Actinobacteria; PeM15			chemoorganotroph, reported in anaerobic bioreactors	anaerobe	anaerobic respiration																	Garcia-Ruiz et al., 2019	0.0764851	0	0	0	0.0165816	0.00438423	0	0.0202143	0.00951565	0.00657138	0	0.0168936	0.01317	0.0186559	0.0252193	0.0186319	0.0284146	0.0145781	0.00480688	0.0113501	0.0534003	0.0631657	0.0200844	0.00523862	0	0	0.00375869
Bacteria; Planctomycetota; Pla3 lineage; uncultured bacterium	Pir4 lineage		chemolithotroph (?), complex lifestyle often associated with Fe-Ohs	anaerobe/aerobe?	everything																annamox	Storesund and Ovreas, 2013; Dedysh et al., 2019	0	0	0	0.00639959	0.0036848	0	0.00218274	0	0	0	0	0.0337872	0.02195	0.0373118	0.0288221	0.0346021	0.00299101	0	0.0120172	0.00851257	0.00942359	0.00871251	0.00669478	0	0.00473657	0.0170816	0.131554
Bacteria; Proteobacteria; Gammaproteobacteria; Cellvibrionales	Microbulbifer		heterotroph, grows best in sea salt based media	aerobe	aerobic respiration																	Gonzalez et al., 1997	0	0.024758	0.00509061	0.0543965	0	0.0175369	0	0.00224603	0	0.00328569	0	0	0	0	0	0	0.143569	0	0.00240344	0	0.00628239	0	0	0.0366703	0.022104	0.085408	0.0714151
Bacteria; Cyanobacteria; Vampirivibrionia; Gastranaerophilales			chemoorganotroph, non-photosynthetic cyanobacteria	anaerobe	fermentation																	Monchamp et al., 2019	0.00339934	0.0099032	0	0	0.0718536	0.074532	0.0120051	0.0561508	0.00951565	0.0131428	0	0.108119	0.1317	0.259748	0.216166	0.194304	0.0284146	0.0204094	0.00961377	0.00851257	0.138213	0.132866	0.147285	0	0.00157886	0	0
Bacteria; Bacteroidota; Rhodothermia; Rhodothermales			heterotroph, obligate marine (NaCl 2-4 %)	aerobe	aerobic respiration																	Park et al., 2019	0.0135973	0.121314	0.152718	0.396775	0.0202664	0.00876847	0.0109137	0.00673809	0	0.00328569	0	0.00675744	0.00878002	0.00574028	0.00360276	0	0.00149551	0	0	0	0.0031412	0	0	0	0	0	0.0263108
Bacteria; Bdellovibrionota; Bdellovibrionia; Bdellovibrionales	OM27 clade- Oenococcus Oeni ??		chemoorganotroph, fermenter in italian wine	anaerobe	fermentation																	faprotax	0.00679867	0.0024758	0	0.0031998	0.232143	0.346355	0.00982233	0.476158	0.233134	0.118285	0.0811688	0.10474	0.19316	0.754847	0.798011	1.09396	0.426219	0.00291562	0.00721033	0.00283752	0.0282708	0.0239594	0.0368213	0	0	0	0.00375869
Bacteria; Proteobacteria; Alphaproteobacteria; SAR11 clade	Clade III	Proteobacteria - Alphaproteobacteria - SAR11 clade	heterotroph	strict aerobe	aerobic respiration: C1 oxidation																	Sun, 2011; Henson, 2017	0	0	0	0	0	0	0.00218274	0	0	0	0	0	0	0	0	0	0	0	0	0	0	0.00217813	0	0	0.00157886	0	0
Bacteria; Firmicutes; Clostridia; Christensenellales	Christensenellaceae		chemoorganotroph, gut bacteria	anaerobe	fementation																	Waters and Ley, 2019	0	0.133693	0.371615	0.127992	0.0939625	0.241133	0.100406	0	0.0428204	0.00328569	0	0.0101362	0	0.00143507	0.00180138	0	0.00299101	0.00291562	0	0.00283752	0	0	0.00334739	0	0	0	0
Bacteria; Bacteroidota; Rhodothermia; Balneolales	Balneolaceae		heterotroph, halotolerant (up to 10% NaCl, pH 7.0-9.0)	facultative anaerobe	aerobic respiration																	Xia et al., 2017	0.0118977	0.0693224	0.0305437	0.252784	0.00921201	0.0350739	0.029467	0	0	0	0	0.00337872	0	0	0	0	0.0792618	0	0	0	0	0	0	0	0	0	0
Bacteria; Proteobacteria; Gammaproteobacteria; Thiotrichales			chemolithotroph, sulfur oxidizing (?)	facultative anaerobe	sulfur oxidation																	Garrity in Bergey´s Manual (2015)	0.00169967	0.0024758	0	0	0.0018424	0	0	0	0	0	0	0.0202723	0.00731668	0.00861042	0.0180138	0.0053234	0.0239281	0	0	0	0	0	0	0	0	0	0.00375869
Bacteria; Deinococcota; Deinococci; Deinococcales	Truepera		chemoorganotroph, pH 7.5-9.5, NaCl up to 6%	aerobe	aerobic respiration																	Albuquerque et al., 2005	0.00339934	0.0519918	0.111993	0.179189	0.0018424	0.00438423	0.020736	0	0	0	0	0	0.00146334	0	0.00180138	0	0.0329011	0.00291562	0	0	0	0	0	0	0	0	0
Bacteria; Myxococcota; Myxococcia; Myxococcales	P3OB-42		heterotroph, associated with coral acropora cervicornis/-palmata	aerobe	aerobic respiration																	Rosales at al., 2019	0.0135973	0.0891288	0.127265	0.393575	0.027636	0.0175369	0.00873096	0.00673809	0.0142735	0.00328569	0	0.00337872	0.0117067	0.0129156	0.0162124	0.0106468	0.478562	0	0	0	0.015706	0.00217813	0.0133896	0	0	0	0.0112761
Bacteria; Proteobacteria; Gammaproteobacteria; MBAE14			heterotroph, inhabits ammonia rich, oxygen and labile OM limited conditions	aerobe/microaerophil	aerobic respiration																denitrification	Mori et al., 2019	0	0	0	0	0	0	0.00109137	0	0	0	0	0	0	0	0	0	0	0	0	0	0	0	0	0	0	0	0.330765
Bacteria; Firmicutes; Bacilli; Lactobacillales	Streptococcus		chemoorganotroph, grows < pH 5, lactate as end product	anaerobe	fermentation																	Hammes and Hertel in Bergey´s Manual (2015)	0.0594884	0.0024758	0	0	0	0	0	0	0	0	0	0.00675744	0.00878002	0.00143507	0.00720552	0	0.00448652	0.00291562	0	0	0.00942359	0.0326719	0.0267791	0.0104772	0.00210514	0	0.00375869
Bacteria; Fusobacteriota; Fusobacteriia; Fusobacteriales	Propionigenium		chemoorganotroph, occurs typically in anoxic, marine sediments	anaerobe	fermentation																	Schink and Pfennig in Bergey´s Manual (2015)	0.243053	0.0024758	0.00509061	0.0031998	0	0	0.00436548	0	0	0.00328569	0	0	0	0.020091	0.00180138	0	0.0239281	0.0145781	0	0	0.0031412	0	0.00334739	0.00523862	0.00473657	0	0
Bacteria; Patescibacteria; WWE3; uncultured bacterium	Katanobacteria		chemoorganotroph, chitin and hemicellulose as putative carbon substrate	anaerobe	fermentation																	Solden et al., 2016, Guermazi et al., 2008	0	0	0	0.0031998	0	0	0	0	0	0	0	0	0	0	0	0	0	0	0	0	0	0	0	0	0	0	0
Bacteria; Proteobacteria; Alphaproteobacteria; Alphaproteobacteria Incertae Sedis	Sporospirillum		chemoorganotroph, occur in the intestinals of tadpols	unknown, probably anaerobe	fermentation																	Pot and Gillis in Bergey´s Manual (2015)	1.5348	0.049516	0.0356343	0.00959939	0.0626416	0.0438423	0.00109137	0.00673809	0	0	0.0270563	0	0	0.00287014	0	0	0.0523427	0	0	0	0	0	0	0	0	0	0
Bacteria; Chloroflexi; Anaerolineae; MSB-5B2			chemoorganotroph, normally abundant in anoxic Corg rich sediments	anaerobe	fermentation																	Vuillemmin et al., 2016	0	0	0	0	0	0	0	0	0	0.00985707	0	0.00675744	0.00878002	0.00287014	0	0	0.00149551	0	0.00240344	0	0	0	0	0	0	0	0
Bacteria; Proteobacteria; Gammaproteobacteria; B108	Roseovarius		heterotroph, halotolerant (up to 15% NaCl, optimum 3-5%	aerobe	aerobic respiration																nitrate reduction (?)	KJ817600/KJ604894 (accession ID closest hits in NCBI)	0	0	0	0	0.0018424	0	0	0	0	0	0	0	0	0.00143507	0.00180138	0	0	0	0	0	0	0	0	0	0	0	0
Bacteria; Verrucomicrobiota; Verrucomicrobiae; Verrucomicrobiales	Haloferula	Verrucomicrobia - Verrucomicrobiae - Verrucomicrobiales	chemoheterotroph	aerobe	aerobic respiration																nitrogen fixation	Chiang et al., 2018	0	0	0	0.0031998	0.0036848	0	0.00218274	0	0	0.00985707	0	0	0	0	0	0.0026617	0.0717843	0	0	0	0	0	0	0	0	0	0
Bacteria; Proteobacteria; Gammaproteobacteria; Salinisphaerales	Salinisphaera		heterotroph	aerobe	sometimes sulf.red.																	Antunes et al., 2017	0	0	0	0	0	0	0	0	0	0	0	0	0	0	0	0	0	0	0	0	0	0	0	0	0	0	0
sulfate reduction
denitrification
aerobe (facultative + strict)
oxygenic phototroph
fermentation
chemolithotroph
anoxygenic phototroph
complex lifestyle; various metabolisms possible
parasite
[truncated: 37 more columns]

## Sheet:  Table S9 Literature bac. taxa
Reference
Albuquerque, L., Simoes C., Nobre, M. F., Pino, N. M., Battista, J. R., ... & da Costa, M. S. (2005). Truepara radiovictrix gen. nov. sp. nov., a new radiation resistant species and the proposal of Trueperaceae fam. nov.. Fems Microbiology Letters, 247, 161-169.
Albuquerque, L., França, L., Rainey, F. A., Schumann, P., Nobre, M. F., & da Costa, M. S. (2011). Gaiella occulta gen. nov., sp. nov., a novel representative of a deep branching phylogenetic lineage within the class Actinobacteria and proposal of Gaiellaceae fam. nov. and Gaiellales ord. nov.. Systematic and applied microbiology, 34, 595-599.
Alderkamp, A. C., Sintes, E., & Herndl, G. J. (2006). Abundance and activity of major groups of prokaryotic plankton in the coastal North Sea during spring and summer. Aquatic microbial ecology, 45, 237-246.
Andersen, M. H., McIlroy, S. J., Nierychlo, M., Nielsen, P. H., & Albertsen, M. (2019). Genomic insights into Candidatus Amarolinea aalborgensis gen. nov., sp. nov., associated with settleability problems in wastewater treatment plants. Systematic and applied microbiology, 42, 77-84.
Antunes, A., Rainey, F. A., Wanner, G., Taborda, M., Pätzold, J., Nobre, M. F., ... & Huber, R. (2008). A new lineage of halophilic, wall-less, contractile bacteria from a brine-filled deep of the Red Sea. Journal of bacteriology, 190, 3580-3587.
Antunes, J. E. L., Lyra, M. C. C. P., Ollero Márquez, F. J., Freitas, A. D. S. D., Oliveira, L. M. S., Araújo, A. S. F., & Figueiredo, M. D. V. B. (2017). Diversity of plant growth-promoting bacteria associated with sugarcane. Genetics and Molecular Research, 16, gmr16029662-.
Baker, B. J., Lazar, C. S., Teske, A. P., & Dick, G. J. (2015). Genomic resolution of linkages in carbon, nitrogen, and sulfur cycling among widespread estuary sediment bacteria. Microbiome, 3, 14.
Bayer, K., Jahn, M. T., Slaby, B. M., Moitinho-Silva, L., & Hentschel, U. (2018). Marine sponges as Chloroflexi hot spots: genomic insights and high-resolution visualization of an abundant and diverse symbiotic clade. MSystems, 3(6).
Biderre-Petit, C., Dugat-Bony, E., Mege, M., Parisot, N., Adrian, L., Moné, A., ... & Peyret, P. (2016). Distribution of Dehalococcoidia in the anaerobic deep water of a remote meromictic crater lake and detection of Dehalococcoidia-derived reductive dehalogenase homologous genes. PloS one, 11, e0145558.
Bowman, J. P., Nichols, C. M., & Gibson, J. A. (2003). Algoriphagus ratkowskyi gen. nov., sp. nov., Brumimicrobium glaciale gen. nov., sp. nov., Cryomorpha ignava gen. nov., sp. nov. and Crocinitomix catalasitica gen. nov., sp. nov., novel flavobacteria isolated from various polar habitats. Journal of Medical Microbiology, 53, 1343-1355.
Bowman, J. P., & McMeekin, T. A. (2015). Marinobacter. Bergey's Manual of Systematics of Archaea and Bacteria, 1-6.
Burganskaya, E. I., Bryantseva, I. A., Gaisin, V. A., Grouzdev, D. S., Rysina, M. S., Barkhutova, D. D., ... & Kuznetsov, B. B. (2018). Benthic phototrophic community from Kiran soda lake, south-eastern Siberia. Extremophiles, 22, 211-220.
Castenholz, R. W. (2015). General characteristics of the cyanobacteria. Bergey's Manual of Systematics of Archaea and Bacteria, 1-23.
Chiang, E., Schmidt, M. L., Berry, M. A., Biddanda, B. A., Burtner, A., Johengen, T. H., ... & Denef, V. J. (2018). Verrucomicrobia are prevalent in north-temperate freshwater lakes and display class-level preferences between lake habitats. PloS one, 13, e0195112.
Cleary, D. F., Becking, L. E., Polónia, A. R., Freitas, R. M., & Gomes, N. C. (2015). Composition and predicted functional ecology of mussel-associated bacteria in Indonesian marine lakes. Antonie van Leeuwenhoek, 107, 821-834.
Dastager, S. G., Tang, S. K., Srinivasan, K., Lee, J. C., & Li, W. J. (2014). Kocuria indica sp. nov., isolated from a sediment sample. International journal of systematic and evolutionary microbiology, 64, 869-874.
Dedysh, S. N., & Yilmaz, P. (2018). Refining the taxonomic structure of the phylum Acidobacteria. International journal of systematic and evolutionary microbiology, 68, 3796-3806.
Dedysh, S. N., & Ivanova, A. A. (2019). Planctomycetes in boreal and subarctic wetlands: diversity patterns and potential ecological functions. FEMS microbiology ecology, 95, fiy227.
Deeg, C. M., Zimmer, M. M., George, E. E., Husnik, F., Keeling, P. J., & Suttle, C. A. (2019). Chromulinavorax destructans, a pathogen of microzooplankton that provides a window into the enigmatic candidate phylum Dependentiae. PLoS pathogens, 15, e1007801.
Dohra, H., Arai, K., Urakawa, H., & Fujiwara, T. (2019). Draft Genome Sequence of Nitrosococcus oceani Strain NS58, a Marine Ammonia-Oxidizing Gammaproteobacterium Isolated from Tokyo Bay Sediment. Microbiology Resource Announcements, 8, e00923-19.
Dombrowski, N., Seitz, K. W., Teske, A. P., & Baker, B. J. (2017). Genomic insights into potential interdependencies in microbial hydrocarbon and nutrient cycling in hydrothermal sediments. Microbiome, 5, 1-13.
Doronina, N. V., Poroshina, M. N., Kaparullina, E. N., Ezhov, V. A., & Trotsenko, Y. A. (2013). Methyloligella halotolerans gen. nov., sp. nov. and Methyloligella solikamskensis sp. nov., two non-pigmented halotolerant obligately methylotrophic bacteria isolated from the Ural saline environments. Systematic and applied microbiology, 36, 148-154.
Drancourt, M., & Raoult, D. (2015). Coxiella. Bergey's Manual of Systematics of Archaea and Bacteria, 1-11.
Dréno, B., Pécastaings, S., Corvec, S., Veraldi, S., Khammari, A., & Roques, C. (2018). Cutibacterium acnes (Propionibacterium acnes) and acne vulgaris: a brief look at the latest updates. Journal of the European Academy of Dermatology and Venereology, 32, 5-14.
Dubinina, G., Grabovich, M., Leshcheva, N., Rainey, F. A., & Gavrish, E. (2011). Spirochaetaperfilievii sp. nov., an oxygen-tolerant, sulfide-oxidizing, sulfur-and thiosulfate-reducing spirochaete isolated from a saline spring. International journal of systematic and evolutionary microbiology, 61(1), 110-117.
Dupont, C. L., Rusch, D. B., Yooseph, S., Lombardo, M. J., Richter, R. A., Valas, R., ... & Halpern, A. L. (2012). Genomic insights to SAR86, an abundant and uncultivated marine bacterial lineage. The ISME journal, 6, 1186-1199.
Fadhlaoui, K., Hania, W. B., Postec, A., Fauque, G., Hamdi, M., Ollivier, B., & Fardeau, M. L. (2015). Fusibacter fontis sp. nov., a sulfur-reducing, anaerobic bacterium isolated from a mesothermic Tunisian spring. International journal of systematic and evolutionary microbiology, 65, 3501-3506.
Fahrbach, M., Kuever, J., Remesch, M., Huber, B. E., Kämpfer, P., Dott, W., & Hollender, J. (2008). Steroidobacter denitrificans gen. nov., sp. nov., a steroidal hormone-degrading gammaproteobacterium. International Journal of Systematic and Evolutionary Microbiology, 58, 2215-2223.
Falagán, C., & Johnson, D. B. (2014). Acidibacter ferrireducens gen. nov., sp. nov.: an acidophilic ferric iron-reducing gammaproteobacterium. Extremophiles, 18, 1067-1073.
Farmer III, J. J., & Michael Janda, J. (2015). Vibrionaceae. Bergey's Manual of Systematics of Archaea and Bacteria, 1-7.
Fernandez, A. B., Rasuk, M. C., Visscher, P. T., Contreras, M., Novoa, F., Poire, D. G., ... & Farias, M. E. (2016). Microbial diversity in sediment ecosystems (evaporites domes, microbial mats, and crusts) of hypersaline Laguna Tebenquiche, Salar de Atacama, Chile. Frontiers in microbiology, 7, 1284.
Flombaum, P., Gallegos, J. L., Gordillo, R. A., Rincón, J., Zabala, L. L., Jiao, N., ... & Vera, C. S. (2013). Present and future global distributions of the marine Cyanobacteria Prochlorococcus and Synechococcus. Proceedings of the National Academy of Sciences, 110, 9824-9829.
Foti, M., Sorokin, D. Y., Lomans, B., Mussman, M., Zacharova, E. E., Pimenov, N. V., ... & Muyzer, G. (2007). Diversity, activity, and abundance of sulfate-reducing bacteria in saline and hypersaline soda lakes. Applied and environmental microbiology, 73, 2093-2100.
Garcia, R., Gemperlein, K., & Müller, R. (2014). Minicystis rosea gen. nov., sp. nov., a polyunsaturated fatty acid-rich and steroid-producing soil myxobacterium. International journal of systematic and evolutionary microbiology, 64, 3733-3742.
García-Ruiz, A., González-Rompinelli, E. M., Bartolomé, B., & Moreno-Arribas, M. V. (2011). Potential of wine-associated lactic acid bacteria to degrade biogenic amines. International journal of food microbiology, 148, 115-120.
Garrity, G. M., Bell, J. A., & Lilburn, T. (2015). Proteobacteria phyl. nov. Bergey's Manual of Systematics of Archaea and Bacteria, 1-1.
Glöckner, F. O., Kube, M., Bauer, M., Teeling, H., Lombardot, T., Ludwig, W., ... & Rabus, R. (2003). Complete genome sequence of the marine planctomycete Pirellula sp. strain 1. Proceedings of the National Academy of Sciences, 100, 8298-8303.
Gołębiewski, M., Deja-Sikora, E., Cichosz, M., Tretyn, A., & Wróbel, B. (2014). 16S rDNA pyrosequencing analysis of bacterial community in heavy metals polluted soils. Microbial ecology, 67, 635-647.
González, J. M., Mayer, F., Moran, M. A., Hodson, R. E., & Whitman, W. B. (1997). Microbulbifer hydrolyticus gen. nov., sp. nov., and Marinobacterium georgiense gen. nov., sp. nov., two marine bacteria from a lignin-rich pulp mill waste enrichment community. International Journal of Systematic and Evolutionary Microbiology, 47, 369-376.
Grouzdev, D. S., Kuznetsov, B. B., Keppen, O. I., Krasil’nikova, E. N., Lebedeva, N. V., & Ivanovsky, R. N. (2015). Reconstruction of bacteriochlorophyll biosynthesis pathways in the filamentous anoxygenic phototrophic bacterium Oscillochloris trichoides DG-6 and evolution of anoxygenic phototrophs of the order Chloroflexales. Microbiology, 161, 120-130.
Guermazi, S., Daegelen, P., Dauga, C., Rivière, D., Bouchez, T., Godon, J. J., ... & Le Paslier, D. (2008). Discovery and characterization of a new bacterial candidate division by an anaerobic sludge digester metagenomic approach. Environmental microbiology, 10, 2111-2123.
Hammes, W. P., & Hertel, C. (2015). Lactobacillus. Bergey's manual of systematics of archaea and bacteria, 1-76.
Ben Hania, W., Joseph, M., Bunk, B., Spröer, C., Klenk, H. P., Fardeau, M. L., & Spring, S. (2017). Characterization of the first cultured representative of a Bacteroidetes clade specialized on the scavenging of cyanobacteria. Environmental microbiology, 19, 1134-1148.
Hu, D., Gao, C., Sun, C., Jin, T., Fan, G., Mok, K. M., & Lee, S. M. Y. (2019). Genome-guided and mass spectrometry investigation of natural products produced by a potential new actinobacterial strain isolated from a mangrove ecosystem in Futian, Shenzhen, China. Scientific reports, 9(1), 1-12.
Huber, K. J., & Overmann, J. (2018). Vicinamibacteraceae fam. nov., the first described family within the subdivision 6 Acidobacteria. International Journal of Systematic and Evolutionary Microbiology, 68, 2331-2334.
Hug, L. A., Castelle, C. J., Wrighton, K. C., Thomas, B. C., Sharon, I., Frischkorn, K. R., ... & Banfield, J. F. (2013). Community genomic analyses constrain the distribution of metabolic traits across the Chloroflexi phylum and indicate roles in sediment carbon cycling. Microbiome, 1, 1-17.
Iino, T., Sakamoto, M., & Ohkuma, M. (2015). Prolixibacter denitrificans sp. nov., an iron-corroding, facultatively aerobic, nitrate-reducing bacterium isolated from crude oil, and emended descriptions of the genus Prolixibacter and Prolixibacter bellariivorans. International journal of systematic and evolutionary microbiology, 65, 2865-2869.
Imhoff, J. F. (2015). Rhodobacter. Bergey's Manual of Systematics of Archaea and Bacteria, 1-12.
Janssen, P. H. (2006). Identifying the dominant soil bacterial taxa in libraries of 16S rRNA and 16S rRNA genes. Applied and environmental microbiology, 72, 1719-1728.
Kadnikov, V. V., Mardanov, A. V., Beletsky, A. V., Banks, D., Pimenov, N. V., Frank, Y. A., ... & Ravin, N. V. (2018). A metagenomic window into the 2-km-deep terrestrial subsurface aquifer revealed multiple pathways of organic matter decomposition. FEMS microbiology ecology, 94, fiy152.
Kallscheuer, N., Wiegand, S., Peeters, S. H., Jogler, M., Boedeker, C., Heuer, A., ... & Jogler, C. (2019). Description of three bacterial strains belonging to the new genus Novipirellula gen. nov., reclassificiation of Rhodopirellula rosea and Rhodopirellula caenicola and readjustment of the genus threshold of the phylogenetic marker rpoB for Planctomycetaceae. Antonie van Leeuwenhoek, 1-17.
Kawaichi, S., Ito, N., Kamikawa, R., Sugawara, T., Yoshida, T., & Sako, Y. (2013). Ardenticatena maritima gen. nov., sp. nov., a ferric iron-and nitrate-reducing bacterium of the phylum ‘Chloroflexi’isolated from an iron-rich coastal hydrothermal field, and description of Ardenticatenia classis nov. International journal of systematic and evolutionary microbiology, 63, 2992-3002.
Kielak, A. M., Barreto, C. C., Kowalchuk, G. A., van Veen, J. A., & Kuramae, E. E. (2016). The ecology of Acidobacteria: moving beyond genes and genomes. Frontiers in microbiology, 7, 744.
Kraiselburd, I., Brüls, T., Heilmann, G., Kaschani, F., Kaiser, M., & Meckenstock, R. U. (2019). Metabolic reconstruction of the genome of candidate Desulfatiglans TRIP_1 and identification of key candidate enzymes for anaerobic phenanthrene degradation. Environmental microbiology, 21, 1267-1286.
Kuang, W., Li, J., Zhang, S., & Long, L. (2015). Diversity and distribution of Actinobacteria associated with reef coral Porites lutea. Frontiers in microbiology, 6, 1094.
Kurahashi, M., Fukunaga, Y., Sakiyama, Y., Harayama, S., & Yokota, A. (2010). Euzebya tangerina gen. nov., sp. nov., a deeply branching marine actinobacterium isolated from the sea cucumber Holothuria edulis, and proposal of Euzebyaceae fam. nov., Euzebyales ord. nov. and Nitriliruptoridae subclassis nov. International journal of systematic and evolutionary microbiology, 60, 2314-2319.
Lage, O. M., & Bondoso, J. (2014). Planctomycetes and macroalgae, a striking association. Frontiers in microbiology, 5, 267.
Lawson, P. A. (2015). Anaerotruncus. Bergey's Manual of Systematics of Archaea and Bacteria, 1-4.
Lazarev, V. N., Levitskii, S. A., Basovskii, Y. I., Chukin, M. M., Akopian, T. A., Vereshchagin, V. V., ... & Vitreschak, A. G. (2011). Complete genome and proteome of Acholeplasma laidlawii. Journal of bacteriology, 193, 4943-4953.
Leung, Y. H., Ng, A. M., Xu, X., Shen, Z., Gethings, L. A., Wong, M. T., ... & Lee, P. K. (2014). Mechanisms of antibacterial activity of MgO: non‐ROS mediated toxicity of MgO nanoparticles towards Escherichia coli. Small, 10, 1171-1183.
Long, M. R., Zhang, D. F., Yang, X. Y., Zhang, X. M., Zhang, Y. G., Zhang, Y. M., ... & Li, W. J. (2013). Halomonas nanhaiensis sp. nov., a halophilic bacterium isolated from a sediment sample from the South China Sea. Antonie van Leeuwenhoek, 103, 997-1005.
Louyakis, A. S., Gourlé, H., Casaburi, G., Bonjawo, R. M., Duscher, A. A., & Foster, J. S. (2018). A year in the life of a thrombolite: comparative metatranscriptomics reveals dynamic metabolic changes over diel and seasonal cycles. Environmental microbiology, 20, 842-861.
Makita, H., Kikuchi, S., Mitsunobu, S., Takaki, Y., Yamanaka, T., Toki, T., ... & Yamamoto, M. (2016). Comparative analysis of microbial communities in iron-dominated flocculent mats in deep-sea hydrothermal environments. Applied and environmental microbiology, 82, 5741-5755.
Matsumoto, A., Kasai, H., Matsuo, Y., Ōmura, S., Shizuri, Y., & Takahashi, Y. (2009). Ilumatobacter fluminis gen. nov., sp. nov., a novel actinobacterium isolated from the sediment of an estuary. The Journal of general and applied microbiology, 55, 201-205.
McIlroy, S. J., Porter, K., Seviour, R. J., & Tillett, D. (2009). Extracting nucleic acids from activated sludge which reflect community population diversity. Antonie Van Leeuwenhoek, 96, 593.
Mizuno, C. M., Rodriguez-Valera, F., & Ghai, R. (2015). Genomes of planktonic acidimicrobiales: widening horizons for marine actinobacteria by metagenomics. MBio, 6.
Mohr, K. I., Garcia, R. O., Gerth, K., Irschik, H., & Müller, R. (2012). Sandaracinus amylolyticus gen. nov., sp. nov., a starch-degrading soil myxobacterium, and description of Sandaracinaceae fam. nov. International journal of systematic and evolutionary microbiology, 62, 1191-1198.
Monchamp, M. E., Spaak, P., & Pomati, F. (2019). Long term diversity and distribution of non-photosynthetic cyanobacteria in peri-alpine lakes. Frontiers in microbiology, 9, 3344.
Mori, J. F., Chen, L. X., Jessen, G. L., Rudderham, S. B., McBeth, J. M., Lindsay, M. B., ... & Warren, L. A. (2019). Putative mixotrophic nitrifying-denitrifying Gammaproteobacteria implicated in nitrogen cycling within the ammonia/oxygen transition zone of an oil sands pit lake. Frontiers in microbiology, 10, 2435.
Munoz, R., Rosselló-Móra, R., & Amann, R. (2016). Revised phylogeny of Bacteroidetes and proposal of sixteen new taxa and two new combinations including Rhodothermaeota phyl. nov. Systematic and applied microbiology, 39, 281-296.
Nakasaki, K., Hirai, H., Mimoto, H., Quyen, T. N. M., Koyama, M., & Takeda, K. (2019). Succession of microbial community during vigorous organic matter degradation in the primary fermentation stage of food waste composting. Science of The Total Environment, 671, 1237-1244.
Nepomnyashaya, Y. N., Slobodkina, G. B., Kolganova, T. V., Bonch-Osmolovskaya, E. A., Netrusov, A. I., & Slobodkin, A. I. (2010). Phylogenetic composition of enrichment cultures of thermophilic prokaryotes reducing poorly crystalline Fe (III) oxide with and without direct contact between the cells and mineral. Microbiology, 79, 663-671.
Park, M. J., Oh, J. H., Yang, S. H., & Kwon, K. K. (2019). Roseithermus sacchariphilus gen. nov., sp. nov. and proposal of Salisaetaceae fam. nov., representing new family in the order Rhodothermales. International journal of systematic and evolutionary microbiology, 69, 1213-1219.
Pérez-Cataluña, A., Elizaquível, P., Carrasco, P., Espinosa, J., Reyes, D., Wacher, C., & Aznar, R. (2018). Diversity and dynamics of lactic acid bacteria in Atole agrio, a traditional maize-based fermented beverage from South-Eastern Mexico, analysed by high throughput sequencing and culturing. Antonie Van Leeuwenhoek, 111, 385-399.
Pérez‐Pantoja, D., Donoso, R., Agulló, L., Córdova, M., Seeger, M., Pieper, D. H., & González, B. (2012). Genomic analysis of the potential for aromatic compounds biodegradation in Burkholderiales. Environmental microbiology, 14, 1091-1117.
Poindexter, J. S. (2015). Caulobacter. Bergey's Manual of Systematics of Archaea and Bacteria, 1-25.
Pot, B., & Gillis, M. (2015). Incertae Sedis XII.Sporospirillum. Bergey's Manual of Systematics of Archaea and Bacteria, 1-2.
Radwan, M., Hanora, A., Zan, J., Mohamed, N. M., Abo-Elmatty, D. M., Abou-El-Ela, S. H., & Hill, R. T. (2010). Bacterial community analyses of two Red Sea sponges. Marine biotechnology, 12, 350-360.
Ravot, G., Magot, M., Fardeau, M. L., Patel, B. K., Thomas, P., Garcia, J. L., & Ollivier, B. (1999). Fusibacter paucivorans gen. nov., sp. nov., an anaerobic, thiosulfate-reducing bacterium from an oil-producing well. International Journal of Systematic and Evolutionary Microbiology, 49, 1141-1147.
Reichenbach, H. (2015). Myxococcales. Bergey's Manual of Systematics of Archaea and Bacteria, 1-31.
Rosales, S. M., Miller, M. W., Williams, D. E., Traylor-Knowles, N., Young, B., & Serrano, X. M. (2019). Microbiome differences in disease-resistant vs. susceptible Acropora corals subjected to disease challenge assays. Scientific reports, 9, 1-11.
Roush, D., A Elias, D., & R Mormile, M. (2014). Metabolic capabilities of the members of the order Halanaerobiales and their potential biotechnological applications. Current Biotechnology, 3, 3-9.
Schattenhofer, M., Fuchs, B. M., Amann, R., Zubkov, M. V., Tarran, G. A., & Pernthaler, J. (2009). Latitudinal distribution of prokaryotic picoplankton populations in the Atlantic Ocean. Environmental Microbiology, 11, 2078-2093.
Schink, B., & Janssen, P. H. (2015). Propionigenium. Bergey's Manual of Systematics of Archaea and Bacteria, 1-3.
Schleifer, K. H., & Bell, J. A. (2015). Staphylococcus. Bergey's Manual of Systematics of Archaea and Bacteria, 1-43.
Schneider, D., Arp, G., Reimer, A., Reitner, J., & Daniel, R. (2013). Phylogenetic analysis of a microbialite-forming microbial mat from a hypersaline lake of the Kiritimati Atoll, Central Pacific. PloS one, 8, e66662.
Schouw, A., Vulcano, F., Roalkvam, I., Hocking, W. P., Reeves, E., Stokke, R., ... & Steen, I. H. (2018). Genome analysis of Vallitalea guaymasensis strain L81 isolated from a deep-sea hydrothermal vent system. Microorganisms, 6, 63.
Sekiguchi, Y., Yamada, T., Hanada, S., Ohashi, A., Harada, H., & Kamagata, Y. (2003). Anaerolinea thermophila gen. nov., sp. nov. and Caldilinea aerophila gen. nov., sp. nov., novel filamentous thermophiles that represent a previously uncultured lineage of the domain Bacteria at the subphylum level. International journal of systematic and evolutionary microbiology, 53, 1843-1851.
Sheik, C. S., Jain, S., & Dick, G. J. (2014). Metabolic flexibility of enigmatic SAR 324 revealed through metagenomics and metatranscriptomics. Environmental microbiology, 16, 304-317.
Shin, N. R., Roh, S. W., Kim, M. S., Yun, B., Whon, T. W., Kim, Y. O., & Bae, J. W. (2012). Tropicimonas sediminicola sp. nov., isolated from marine sediment. International journal of systematic and evolutionary microbiology, 62, 2424-2429.
Skennerton, C. T., Haroon, M. F., Briegel, A., Shi, J., Jensen, G. J., Tyson, G. W., & Orphan, V. J. (2016). Phylogenomic analysis of Candidatus ‘Izimaplasma’species: free-living representatives from a Tenericutes clade found in methane seeps. The ISME journal, 10, 2679-2692.
Solden, L., Lloyd, K., & Wrighton, K. (2016). The bright side of microbial dark matter: lessons learned from the uncultivated majority. Current opinion in microbiology, 31, 217-226.
Sorokin, D. Y., Tourova, T. P., Braker, G., & Muyzer, G. (2007). Thiohalomonas denitrificans gen. nov., sp. nov. and Thiohalomonas nitratireducens sp. nov., novel obligately chemolithoautotrophic, moderately halophilic, thiodenitrifying Gammaproteobacteria from hypersaline habitats. International journal of systematic and evolutionary microbiology, 57, 1582-1589.
Sorokin, D. Y., van Pelt, S., Tourova, T. P., & Evtushenko, L. I. (2009). Nitriliruptor alkaliphilus gen. nov., sp. nov., a deep-lineage haloalkaliphilic actinobacterium from soda lakes capable of growth on aliphatic nitriles, and proposal of Nitriliruptoraceae fam. nov. and Nitriliruptorales ord. nov. International journal of systematic and evolutionary microbiology, 59, 248-253.
Stams, A. J. M., Hansen, T. A., & Skyring, G. W. (1985). Utilization of amino acids as energy substrates by two marineDesulfovibrio strains. FEMS Microbiology Letters, 31, 11-15.
Storesund, J. E., & Øvreås, L. (2013). Diversity of Planctomycetes in iron-hydroxide deposits from the Arctic Mid Ocean Ridge (AMOR) and description of Bythopirellula goksoyri gen. nov., sp. nov., a novel Planctomycete from deep sea iron-hydroxide deposits. Antonie Van Leeuwenhoek, 104, 569-584.
Sun, J., Steindler, L., Thrash, J. C., Halsey, K. H., Smith, D. P., Carter, A. E., ... & Giovannoni, S. J. (2011). One carbon metabolism in SAR11 pelagic marine bacteria. PloS one, 6(8), e23973.
Suzuki, D., Ueki, A., Amaishi, A., & Ueki, K. (2007). Desulfopila aestuarii gen. nov., sp. nov., a Gram-negative, rod-like, sulfate-reducing bacterium isolated from an estuarine sediment in Japan. International journal of systematic and evolutionary microbiology, 57, 520-526.
Thoms, C., Horn, M., Wagner, M., Hentschel, U., & Proksch, P. (2003). Monitoring microbial diversity and natural product profiles of the sponge Aplysina cavernicola following transplantation. Marine Biology, 142, 685-692.
Van der Maarel, M. J., van Bergeijk, S., van Werkhoven, A. F., Laverman, A. M., Meijer, W. G., Stam, W. T., & Hansen, T. A. (1996). Cleavage of dimethylsulfoniopropionate and reduction of acrylate by Desulfovibrio acrylicus sp. nov. Archives of microbiology, 166, 109-115.
Vavourakis, C. D., Andrei, A. S., Mehrshad, M., Ghai, R., Sorokin, D. Y., & Muyzer, G. (2018). A metagenomics roadmap to the uncultured genome diversity in hypersaline soda lake sediments. Microbiome, 6, 1-18.
Vreeland, R. H. (2015). Halomonas. Bergey's Manual of Systematics of Archaea and Bacteria, 1-19.
Vuillemin, A., Friese, A., Alawi, M., Henny, C., Nomosatryo, S., Wagner, D., ... & Kallmeyer, J. (2016). Geomicrobiological features of ferruginous sediments from Lake Towuti, Indonesia. Frontiers in microbiology, 7, 1007.
Wang, Z. J., Liu, Q. Q., Zhao, L. H., Du, Z. J., & Chen, G. J. (2015). Bradymonas sediminis gen. nov., sp. nov., isolated from coastal sediment, and description of Bradymonadaceae fam. nov. and Bradymonadales ord. nov. International Journal of Systematic and Evolutionary Microbiology, 65, 1542-1549.
Waters, J. L., & Ley, R. E. (2019). The human gut bacteria Christensenellaceae are widespread, heritable, and associated with health. BMC biology, 17, 83.
Wiese, J., Imhoff, J. F., Horn, H., Borchert, E., Kyrpides, N. C., Göker, M., ... & Hentschel, U. (2019). Genome analysis of the marine bacterium Kiloniella laminariae and first insights into comparative genomics with related Kiloniella species. Archives of Microbiology, 1-10.
Xia, Y., Wang, Y., Wang, Y., Chin, F. Y., & Zhang, T. (2016). Cellular adhesiveness and cellulolytic capacity in Anaerolineae revealed by omics-based genome interpretation. Biotechnology for biofuels, 9, 1-13.
Xia, Y., Lü, C., Hou, N., Xin, Y., Liu, J., Liu, H., & Xun, L. (2017). Sulfide production and oxidation by heterotrophic bacteria under aerobic conditions. The ISME journal, 11(12), 2754-2766.
Yabuuchi, E., & Kosako, Y. (2015). Sphingomonas. Bergey's Manual of Systematics of Archaea and Bacteria, 1-39.
Yamamura, S., Sudo, T., Watanabe, M., Tsuboi, S., Soda, S., Ike, M., & Amachi, S. (2018). Effect of extracellular electron shuttles on arsenic-mobilizing activities in soil microbial communities. Journal of hazardous materials, 342, 571-578.
Zhang, Y., & Gladyshev, V. N. (2008). Molybdoproteomes and evolution of molybdenum utilization. Journal of molecular biology, 379, 881-899.
Zhang, X., Tu, B., Dai, L. R., Lawson, P. A., Zheng, Z. Z., Liu, L. Y., ... & Cheng, L. (2018). Petroclostridium xylanilyticum gen. nov., sp. nov., a xylan-degrading bacterium isolated from an oilfield, and reclassification of clostridial cluster III members into four novel genera in a new Hungateiclostridiaceae fam. nov. International journal of systematic and evolutionary microbiology, 68, 3197…
Zhu, B., Liu, C., Liu, S., Cong, H., Chen, Y., Gu, L., & Ma, L. Z. (2016). Membrane association of SadC enhances its diguanylate cyclase activity to control exopolysaccharides synthesis and biofilm formation in Pseudomonas aeruginosa. Environmental microbiology, 18, 3440-3452.
Zhu, L., Xu, H., Xiao, W., Lu, J., Lu, D., Chen, X., ... & Wang, L. (2020). Ecotoxicological effects of sulfonamide on and its removal by the submerged plant Vallisneria natans (Lour.) Hara. Water Research, 170, 115354.
